# Supplementary material for: Chemical control of spin–lattice relaxation to discover a room temperature molecular qubit
Source: Chem Sci. 2022 May 17;13(23):7034–45. doi: 10.1039/d1sc06130e (PMC9200133; doi:10.1039/d1sc06130e)
Supplement: SC-013-D1SC06130E-s001 [file SC-013-D1SC06130E-s001.pdf]

**Supplementary Information:**

# **Chemical Control of Spin-Lattice Relaxation to Create Room Temperature Molecular Qubit Candidates**

**M. Jeremy Amdur,<sup>1</sup> Kathleen R. Mullin,<sup>2</sup> Michael J. Waters,<sup>2</sup> Danilo Puggioni,<sup>2</sup> Michael K. Wojnar,<sup>1</sup> Mingqiang Gu,<sup>2</sup> Lei Sun,<sup>3</sup> Paul H. Oyala,<sup>4</sup> James M. Rondinelli,<sup>2\*</sup> Danna E. Freedman<sup>1,5\*</sup>**

<sup>1</sup>Department of Chemistry, Massachusetts Institute of Technology, Cambridge, Massachusetts, 02139,  
United States

<sup>2</sup>Department of Materials Science and Engineering, Northwestern University, Evanston, Illinois, 60208,  
United States

<sup>3</sup>Center for Nanoscale Materials, Argonne National Laboratory, Argonne, Illinois, 60439, United States

<sup>4</sup>Division of Chemistry and Chemical Engineering, California Institute of Technology, Pasadena,  
California, 91125, United States

<sup>5</sup>Department of Chemistry, Northwestern University, Evanston, Illinois, 60208, United States

## Table of Contents

|                                                                                                                                 |                |
|---------------------------------------------------------------------------------------------------------------------------------|----------------|
| <b>Full Experimental Details</b>                                                                                                | <b>S4</b>      |
| <b>Table S1</b>   Summary of crystallographic data for <b>1</b>                                                                 | <b>S14</b>     |
| <b>Table S2</b>   Summary of crystallographic data for <b>4</b>                                                                 | <b>S15</b>     |
| <b>Table S3</b>   Summary of crystallographic data for <b>2</b>                                                                 | <b>S16</b>     |
| <b>Table S4</b>   Summary of crystallographic data for <b>5</b>                                                                 | <b>S17</b>     |
| <b>Table S5</b>   Select structural parameters for <b>1–3</b>                                                                   | <b>S18</b>     |
| <b>Table S6–S7</b>   Select structural parameters for calculated structures of <b>1–3</b> using the B3LYP and PBE functionals   | <b>S19</b>     |
| <b>Figure S1</b>   Compliance ellipsoids for <b>1–3</b>                                                                         | <b>S20</b>     |
| <b>Table S8–S10</b>   Calculated d-orbital splitting for <b>1–3</b>                                                             | <b>S21–S23</b> |
| <b>Figure S2–S4</b>   Calculated d-orbital splitting for <b>1–3</b>                                                             | <b>S21–S23</b> |
| <b>Table S11</b>   cw-EPR parameters for <b>1'–3'</b> and <b>1''–3''</b>                                                        | <b>S24</b>     |
| <b>Table S12</b>   Computed cw-EPR parameters for <b>1–3</b>                                                                    | <b>S24</b>     |
| <b>Table S13</b>   Spin density on the copper center and the ligand in <b>1–3</b>                                               | <b>S24</b>     |
| <b>Table S14–S19</b>   $T_1$ saturation recovery fit parameters for <b>1'–3'</b> and <b>1''–3''</b>                             | <b>S25–S29</b> |
| <b>Table S20–S25</b>   $T_m$ 2 pulse Hahn echo decay fit parameters for <b>1'–3'</b> and <b>1''–3''</b>                         | <b>S30–S32</b> |
| <b>Table S26</b>   Parameters for Debye model fit of $T_1$ data for <b>1'–3'</b> and <b>1''–3''</b>                             | <b>S33</b>     |
| <b>Table S27</b>   Room Temperature Rabi rate at variable microwave power attenuation for <b>3'</b>                             | <b>S33</b>     |
| <b>Table S28–S33</b>   Linear and quadratic fits for dg/dq coupling across all vibrational modes                                | <b>S34–S39</b> |
| <b>Table S34–S39</b>   Linear and quadratic fits for $dA_{Cu}/dq$ coupling across all vibrational modes                         | <b>S40–S45</b> |
| <b>Table S40–S45</b>   Linear and quadratic fits for $dA_N/dq$ coupling across all vibrational modes                            | <b>S46–S51</b> |
| <b>Figure S5–7</b>   PXRD for <b>1–3</b>                                                                                        | <b>S52–S54</b> |
| <b>Figure S8</b>   Visualization of the spin density in <b>1</b>                                                                | <b>S55</b>     |
| <b>Figure S9</b>   cw-EPR and simulations for OTP glasses of for <b>1–3</b>                                                     | <b>S56</b>     |
| <b>Figure S10–S12</b>   EDFS spectra for <b>1'–3'</b> and <b>1''–3''</b>                                                        | <b>S57–S59</b> |
| <b>Figure S13–S15</b>   Saturation recovery and Hahn Echo decay data for <b>1'–3'</b> and <b>1''–3''</b>                        | <b>S60–S62</b> |
| <b>Figure S16–S18</b>   $T_1$ and $T_m$ data vs temperature for <b>1'–3'</b> and <b>1''–3''</b>                                 | <b>S63–S65</b> |
| <b>Figure S19–S21</b>   Fits of $T_1$ data to the Debye model vs temperature for <b>1'–3'</b> and <b>1''–3''</b>                | <b>S66–S68</b> |
| <b>Figure S22–S24</b>   Variation in $g_x$ , $g_y$ , and $g_z$ during vibrational motion for highly coupled modes in <b>1–3</b> | <b>S69–S71</b> |
| <b>Figure S25</b>   Histograms representing the vibrational modes within certain spin-phonon coupling regimes                   | <b>S72</b>     |
| <b>Figure S26–S27</b>   Comparison of $T_1$ obtained from experiment with calculated values                                     | <b>S73–S74</b> |
| <b>Figure S28</b>   Cu–E bond length changes during vibrational displacement for <b>1–3</b>                                     | <b>S75</b>     |
| <b>Figure S29</b>   Visualization of the highly coupled low energy vibrational modes in <b>2</b>                                | <b>S76</b>     |
| <b>Figure S30</b>   Visualization of the modes with the highest SPC coefficient in <b>1–3</b>                                   | <b>S77</b>     |
| <b>Figure S31</b>   UV-Vis spectra of <b>1–3</b> in toluene                                                                     | <b>S78</b>     |
| <b>Figure S32–S34</b>   IR and Raman Spectra of <b>1–3</b> , shown with their calculated vibrational spectra.                   | <b>S79–S81</b> |
| <b>Figure S35–S37</b>   Nutation experiments for <b>1'–3'</b> at 5 K.                                                           | <b>S82–S83</b> |
| <b>Figure S38</b>   Visualization of the 70% spin density in <b>1–3</b> .                                                       | <b>S84</b>     |
| <b>References</b>                                                                                                               | <b>S85</b>     |

## Full Experimental Details

**General considerations.** Manipulations and syntheses of air sensitive complexes were performed under a N<sub>2</sub> atmosphere with either an MBraun Unilab Pro glovebox, Vacuum Atmosphere Nexus II glovebox, or using Schlenk techniques. Glassware was either oven-dried at 150 °C for at least four hours and/or flame-dried prior to use. Tetrahydrofuran (THF), *n*-hexanes, diethylether (Et<sub>2</sub>O), and dichloromethane (DCM) were dried using a commercial solvent purification system from Pure Process Technology and stored over 3 or 4 Å sieves prior to use. Et<sub>2</sub>O was subjected to a test with a standard purple solution of sodium benzophenone ketyl in THF to confirm low O<sub>2</sub> and H<sub>2</sub>O content prior to use. Bis(acetylacetonate) ethylene diamine (acacen), N,N'-dimethyl-4-amino-3-penten-2-imine (Me<sub>2</sub>Nac)<sup>1</sup>, copper tetramethyltetraazaannulene (Cu(tmtaa), **3**)<sup>2</sup> and nickel tetramethyltetraazaannulene (Ni(tmtaa), **6**)<sup>2</sup> were synthesized by literature methods. All other reagents were used as received.

**Cu[(CH<sub>3</sub>)<sub>2</sub>C<sub>5</sub>H<sub>7</sub>N<sub>2</sub>]<sub>2</sub> Cu(Me<sub>2</sub>Nac)<sub>2</sub> (**1**).** A 25 mL Schlenk flask with charged with a magnetic stirbar, 5 mL of THF, and Me<sub>2</sub>Nac (0.130 g, 1.03 mmol). The solution was cooled to 0 °C and <sup>n</sup>BuLi was added with stirring. A separate 25 mL Schlenk flask was charged with CuCl<sub>2</sub> (0.067 g, 0.52 mmol) and 10 mL THF and cooled to -78 °C. After 30 minutes of stirring, the lithiated Me<sub>2</sub>Nac solution was added to the CuCl<sub>2</sub> solution under N<sub>2</sub>. The solution was slowly warmed to room temperature overnight. The solvent was then evaporated and replaced with *n*-hexanes. The deep purple solution was filtered through alumina, concentrated, and left at -35 °C overnight. Decanting off the solvent and drying afforded pure, dark crystals of **1** (120 mg, 38% yield) that were suitable for single crystal X-ray diffraction. FTIR (cm<sup>-1</sup>): 444.7, 714.3, 998.4, 1023.1, 1060.2, 1134.3, 1231, 1231, 1249.6, 1290.7, 1354.6, 1371, 1424.6, 1424.6, 1443.1, 1463.7, 1523.4, 1552.2. UV-Vis (toluene) (λ (nm), ε (mM<sup>-1</sup> cm<sup>-1</sup>)): (315, 8.3) (353, 8.0) (415, 8.6) (510, 0.8). ESI-MS (*m/z*): [M]<sup>+</sup> calcd. for C<sub>14</sub>H<sub>27</sub>N<sub>4</sub>Cu, 313.14; found 314.15)

**Zn[(CH<sub>3</sub>)<sub>2</sub>C<sub>5</sub>H<sub>7</sub>N<sub>2</sub>]<sub>2</sub> Zn(Me<sub>2</sub>Nac)<sub>2</sub> (**4**).** A 25 mL Schlenk flask was charged with a magnetic stirbar, 5 mL of THF, and Me<sub>2</sub>Nac (0.130 g, 1.03 mmol). The solution was cooled to 0 °C and <sup>n</sup>BuLi was added with stirring. A separate 25 mL Schlenk flask was charged with ZnCl<sub>2</sub> (0.068 g, 0.52 mmol) and 10mL THF and cooled to -78 °C. After 30 minutes of stirring, the lithiated Me<sub>2</sub>Nac solution was added to the CuCl<sub>2</sub> solution under N<sub>2</sub>. The solution was slowly warmed to room temperature overnight. The solvent was then evaporated and replaced with *n*-hexanes. The clear solution was filtered through alumina, concentrated, and left at -35 °C overnight. The solvent was then removed to afford translucent crystals. To remove unreacted Me<sub>2</sub>Nac, these crystals were redissolved in *n*-hexanes and the crystallization procedure was repeated. Decanting off the solvent and drying afforded pure, pale crystals of **4** (110 mg, 35%) that were suitable for single crystal X-ray diffraction. <sup>1</sup>HNMR (400 MHz, CDCl<sub>3</sub>): δ 4.30 (s, 2H), 2.95 (s, 6H), 1.93 (s 6H). FTIR: UV-Vis (toluene) (λ (nm), ε (mM<sup>-1</sup> cm<sup>-1</sup>)): (418, 1.30). IR: 631.7, 667.4, 679.9, 713.7, 842.9, 997.2, 1012.6, 1022.3, 1066.6, 1138.0, 1357.9, 1372.4, 1409.0, 1430.2, 1481.3, 2336.8, 2361.8, 2911.5, 2973.3, 2982.0 ESI-MS (*m/z*): [M]<sup>+</sup> calcd. for C<sub>14</sub>H<sub>27</sub>N<sub>4</sub>Zn, 314.15; found 314.20).

**Cu[C<sub>12</sub>H<sub>18</sub>N<sub>2</sub>O<sub>2</sub>] Cu(acacen) (**2**).** The acacen ligand (1.0 g, 4.4 mmol) and excess potassium carbonate (2.0 g, 14.8 mmol) were dissolved in 50 mL of H<sub>2</sub>O in a 250 mL round bottom flask and heated to reflux with stirring. To this solution was added a solution of CuCl<sub>2</sub> (0.78 g, 4.4 mmol) in 15 mL of H<sub>2</sub>O which immediately precipitated a purple solid. The solution was stirred at reflux for 1 hour, allowed to cool, and then filtered. The solid was redissolved in DCM and filtered through a silica plug. The solvent was then

evaporated to afford **2** (1.0 g, 81%). Crystals suitable for single crystal X-ray diffraction were obtained by layering water over an acetone solution of **2**. FTIR (cm<sup>-1</sup>): 455, 648.5, 737, 751.3, 944.9, 1012.8, 1039.6, 1274.3, 1282.5, 1352.5, 1416.3, 1516.3, 1476, 1502.8, 1513, 1589.2. UV-Vis (toluene) ( $\lambda$  (nm),  $\epsilon$  (mM<sup>-1</sup> cm<sup>-1</sup>)): (538, 0.6). ESI-MS ( $m/z$ ): [M-H]<sup>+</sup> calcd. for C<sub>12</sub>H<sub>19</sub>N<sub>2</sub>O<sub>2</sub>Cu, 286.07; found 286.06)

**Ni[C<sub>12</sub>H<sub>18</sub>N<sub>2</sub>O<sub>2</sub>] Ni(acacen) (5).** The acacen ligand (1.0 g, 4.4 mmol) and excess potassium carbonate (2.0 g, 14.8 mmol) were dissolved in 50 mL of H<sub>2</sub>O in a 250 mL round bottom flask and heated to reflux with stirring. To this solution was added a solution of NiCl<sub>2</sub> (0.95 g, 4.4 mmol) in 15 mL of H<sub>2</sub>O which immediately precipitated an orange solid. The solution was stirred at reflux for 1 hour, allowed to cool, and then filtered. The solid was redissolved in 25 mL of DCM and filtered through a silica plug. The solvent was then evaporated to afford **5** (1.0 g, 81%). Crystals suitable for single crystal X-ray diffraction were obtained by layering water over an acetone solution of **5**. <sup>1</sup>HNMR (400 MHz, CDCl<sub>3</sub>):  $\delta$  4.91 (s, 2H), 2.03 (s, 6H), 1.88 (s, 6H). FTIR (cm<sup>-1</sup>): 614.3, 691.4, 766.7, 815.9, 950.0, 1016.5, 1048.3, 1073.3, 1106.2, 1126.4, 1220.0, 1238.6, 1402.3, 1506.4, 1587.4. UV-Vis (toluene) ( $\lambda$  (nm),  $\epsilon$  (mM<sup>-1</sup> cm<sup>-1</sup>)): (538, 0.6). ESI-MS ( $m/z$ ): [M-H]<sup>+</sup> calcd. for C<sub>12</sub>H<sub>19</sub>N<sub>2</sub>O<sub>2</sub>Ni, 281.08; found 281.02)

**Preparation of diluted powder EPR Samples:** EPR samples **2'** and **3'** were prepared through dissolution of the paramagnetic center and its diamagnetic analogue in a 1:100 mass ratio (**2:5**, **3:6**) in acetone. Then, with aggressive stirring, this solution was added to water to precipitate a mixed powder approximately 1% paramagnetic center by mass. For **1'**, this approach did not succeed, so diluted powders were instead prepared by taking a concentrated solution of 1:100 **1** to **4** in *n*-hexanes, and leaving it at -35 °C overnight. This yielded pale pink mixed single crystals. These crystals were then recovered, thoroughly crushed, and then dried to yield the dilute mixed powder of **1'**.

**Preparation of glass phase measurements with o-terphenyl.** This study focused on manipulation of the local molecular phonons (vibrations). However, lattice phonons are important in determining the relaxation dynamics of spin systems. To ensure that subtle differences in lattice modes did not impact our results, we needed to compare relaxation dynamics in an identical glassing solvent matrix as well. When all three complexes are dissolved in the same solution, they couple to the same lattice modes, ensuring any differences in observed dynamics are due to differences in the molecules themselves. Many conventional glassing solvents either melt well below room temperature (toluene, 2-methyltetrahydrofuran), or are too polar to solubilize the complexes investigated in this report. Ortho-terphenyl (OTP) overcomes these challenges. OTP is a solid at room temperature with a melting temperature of 60 °C and a glass transition temperature ( $T_g$ ) of -30 °C.<sup>3</sup> We prepared 1% by weight solutions of each of the complexes in OTP (hereafter referred to as **1''-3''**) and 0.1% by dilutions (hereafter referred to as **1'''-3'''**), and show values for the dynamics of these solutions in the SI as well. OTP glasses are not stable for long periods of time. Between 12 hours and 4 days later, the glasses would eventually form crystallites. For compounds with many aromatic groups (such as **3**), we observed no change in cw-EPR spectra before and after the glass crystallized, likely due to retention of homogenous mixing after crystallization. For compounds with a non-zero dipole moment across the molecule (**2**) although no features within the cw-EPR spectra changed during crystallization of OTP, signal intensity decreased drastically, to the point where no detectable signal remained after 5 days. Upon remelting and refreezing of the sample, signal intensity returned to previous values. To minimize any effects of OTP crystallization on measurements, we glassed all solutions in OTP immediately prior to measurement. Occasionally, we observed orientation effects in glassed systems of **3**,

suppressing certain transitions and increasing the intensity of others. On those occasions, the glasses were remade prior to measurement. This preferred orientation was infrequently observed.

For all three systems,  $T_1$  was shorter in the glassy matrix than in the solid state at 5 K (5 ms in **1'** compared to 3 ms in **1''**, 14 ms in **2'** compared to 7 ms in **2''**, and 11 ms in **3'** compared to 1 ms in **3''**). However, these differences disappeared at higher temperatures. In the regime where relaxation was dominated by local mode relaxation,  $T_1$  was largely independent of the matrix. This highlights an important facet of spin-lattice relaxation in  $S = 1/2$  first row transition metal systems: low temperature dynamics are dominated by lattice phonons whereas high temperature dynamics are dominated by intrinsic molecular properties. At low temperatures, therefore, the unique phonon densities of different matrices can have large impacts on relaxation behavior. At high temperatures, local mode mediated relaxation dominates, and dynamics can be largely considered matrix agnostic.  $T_m$  increases in OTP solutions due to the low nuclear spin density of OTP.<sup>4</sup> This effect is most strongly observed in **1**, where removing the methyl group rich environment of **4** enhances  $T_m$  by nearly 2 orders of magnitude (at 5 K,  $T_m = 0.32 \mu\text{s}$  in **1'** compared to  $T_m = 14 \mu\text{s}$  in **1''**).

We observe the same trends observed in the relaxation dynamics of **1'–3'** in **1''–3''** (Table S7). However, there are some slight changes in magnitude of the relaxation parameters.  $A_{\text{Dir}}$  increases in OTP, which is expected from the shorter  $T_1$  in the glass. While we observe a change in  $B_{\text{Ram}}$ , it is important to note that  $B_{\text{Ram}}$  can be selected somewhat arbitrarily for a given value of  $\Theta_D$ .<sup>5</sup> Since the  $\Theta_D$  of the OTP glass was assigned an arbitrary value of 65 K for all three fits, whereas  $\Theta_D$  in the solid state systems was a fit parameter unique to each system, changes in  $B_{\text{Ram}}$  could be attributed to changes in  $\Theta_D$  that we cannot model. Deviations in  $C_{\text{Loc}}$  and  $A_{\text{Loc}}$  are small and frequently within the error of the fit, further reinforcing that local mode relaxation is matrix agnostic.

**Electron Paramagnetic Resonance Measurements.** Samples were prepared for analysis by a solid-state dilution in their respective diamagnetic analogues. Solid-state dilutions were prepared in a 1:100 (1%) ratio to suppress the influence of intermolecular electronic spin interactions on  $T_m$  and  $T_1$ . All samples were loaded into 4 mm OD quartz tubes (Wilma 707-SQ-250M), restrained with eicosane, and flame-sealed under high vacuum. Solution phase measurements were prepared in a 1% by weight dilution with OTP. Though this leads to varying spin concentrations of spin/unit volume, the variation in terms is small (between 1 and 4% spin/volume). The effects of these concentration differences are minimal, and our  $T_m$  times are more heavily influenced by the nuclear spin concentration of the matrix (as discussed above). Additionally, the effects of cross relaxation are naturally suppressed at the higher temperatures of interest in this study (70 K).<sup>6</sup>

Spectroscopic data were obtained on either a Bruker E580 X/Q-band spectrometer or a Bruker E560 X-band spectrometer, both with a split ring resonator (ER4118X-MS5) and a 1 kW TWT amplifier (Applied Systems Engineering). Prior to all pulsed measurements, the resonator was over-coupled to minimize ringdown following application of the microwave pulses. Temperature was controlled with an Oxford Instruments CF935 helium cryostat and an Oxford Instruments ITC503 temperature controller. All EPR data were processed by a combination of XEpr (data collection),<sup>7</sup> Matlab (phasing and normalization of EPR data),<sup>8</sup> Easyspin (modeling and simulation of cw-EPR spectra),<sup>9</sup> and Origin (fitting of decay curves).<sup>10</sup> Absolute intensities of the cw-EPR spectra were normalized between 0 and 1 then, simulated using the pepper function in EasySpin.

Spin-lattice relaxation times were obtained using saturation recovery sequences at the highest intensity peaks in the echo-detected spectrum. These sequences achieved saturation by applying a picket-fence

saturation sequence of twenty consecutive 12 ns pulses. Following a delay time  $T$  beginning at 100 ns, Hahn echo detection was used to monitor the recovery from saturation with  $\pi/2$  and  $\pi$  pulses of 16 and 32 ns, respectively. Four-step phase cycling was used on these measurements. All data was phased by maximization of the sum of the square of the data in the real component of the spectrum. For **2'–3'** and **1''–3''**, data was collected with logarithmic spacing, allowing for data to quickly be taken across orders of magnitude change in time. The  $T_1$  of **1'** was collected using a slightly different detection scheme wherein data was collected with linear spacing, allowing us to capture more points in the regions of largest change. The best fit was obtained using a monoexponential fitting function<sup>11</sup> using the following equation,

$I = -A(e^{-\left(\frac{t}{T_1}\right)} - I_0 - 1)$ . The fit to low temperature data could be improved by including a stretch factor ( $\sigma$ ) to account for the influence of multiple processes with slightly different  $T_1$  constants using the equation

$I = -A(e^{-\left(\frac{t}{T_1}\right)^\sigma} - I_0 - 1)$ . This distribution of  $T_1$  relaxation times has been attributed to a handful of factors, most likely in this report are inequivalences between magnetic sites, causing slight deviation in relaxation rates.<sup>12</sup> A Stretch factor was often required to adequately fit low temperature data. At higher temperatures where single phonon relaxation becomes less prominent, these inequivalences matter less and the stretch factor trends towards 1 as shown in **Tables S14–S19**.

The temperature dependence of  $T_1$  was fit to account for the direct process, Raman process, and local modes using the following expression,

$$\frac{1}{T_1} = A_{Dir}T + B_{Ram}\left(\frac{T}{\Theta_D}\right)^9 J_8\left(\frac{\Theta_D}{T}\right) + C_{Loc} \frac{e^{\Delta_{Loc}/T}}{(e^{\Delta_{Loc}/T} - 1)^2}$$

Where  $T$  is temperature,  $A_{Dir}$  is the coefficient for the direct process,  $B_{Ram}$  is the coefficient for the Raman process,  $J_8$  is the transport integral,<sup>13</sup>  $\Theta_D$  is the Debye temperature,  $C_{Loc}$  is the coefficient for local modes, and  $\Delta_{loc}$  is the energy of the active local modes of vibration. See below for further discussion of the fitting process of the temperature dependence of  $T_1$  across **1'–3'** and **1''–3''**.

Phase memory times ( $T_m$ ) were obtained using a two-pulse Hahn echo sequence,  $\pi/2$ - $\tau$ - $\pi$ - $\tau$ -echo, where  $\tau$  is the time delay between pulses, and  $\pi/2$  or  $\pi$  denote microwave pulses, 16 ns and 32 ns, respectively. Starting delay times were selected to minimize the effects of any observed ringdown. These delays ranged from 100 to 200 ns for all complexes. Four step phase cycling was employed for these experiments as well.

Most systems were modeled using a simple monoexponential decay function  $I = Ae^{\left(\frac{2\tau}{T_2}\right)} - I_0$ . Some systems also exhibited electron spin echo envelope modulation (ESEEM) of the echo intensity, primarily from weakly coupled  $^1\text{H}$  nuclei. Due to the inherent errors in adding the necessary fit parameters to the relaxation equation to model ESEEM, we chose to ignore the ESEEM in our fits.

Nutation experiments were performed by applying a tipping pulse ( $\tau_p$ ) to generate a superposition state, followed by a Hahn-echo detection sequence ( $\tau_p$ - $T$ - $\pi/2$ - $\tau$ - $\pi$ - $\tau$ -echo). For constant  $\tau$  and microwave power, the echo intensity varies with the length of the tipping pulse. As  $\tau_p$  is incremented, the spin samples all superposition states, resulting in a sinusoidal oscillation of echo intensity. Plotting the oscillation in echo intensity versus the tipping pulse length gives a decaying sinusoidal curve, known as a Rabi oscillation – the hallmark of qubit viability.<sup>14,15</sup> For our experiments,  $\tau_p$  was incremented in 2 ns steps

with  $T = 340$  ns, and  $\pi/2$  and  $\pi$  pulse lengths of 16 ns and 32 ns respectively. For the room temperature measurements of **3'**, a large baseline needed to be subtracted from the data. This baseline was only present for these high temperature measurements, suggesting it results from the weak echo intensity.

The Fourier transform of nutation data yields plots of the frequency of oscillation in the experiment. At low temperatures, we observe a secondary peak at approximately 14 MHz, the Larmor frequency of the nearby proton nuclei, as a result of the Hartman-Hahn effect.<sup>16</sup> To demonstrate room temperature qubit manipulation of **3'**, we measured the rate of Rabi oscillations (known as the Rabi rate) at three microwave powers. The relative microwave power was calculated as:

$$\text{relative power} = \sqrt{10^{-0.1(A)} / 10^{-0.1(Z)}}$$

where  $A$  is the microwave power attenuation and  $Z$  is the lowest microwave power attenuation in the set of three molecules examined in the experiment (7.2 dB). Although the trend between Rabi rate and relative microwave power attenuation is expected to be linear, we observe a small deviation from linearity ( $R^2 = 0.988$ ). We attribute this to the weak echo intensity of **3'** at low microwave powers. Because the echo intensity is so weak, we are only able to observe one period of the oscillation, leading to error in our estimation of its Rabi rate.

**X-ray Structure Determination.** All diffraction data were collected in the X-ray crystallography lab of the Integrated Molecular Structure Education and Research Center (IMSERC) at Northwestern University. Single crystals of **1**, **2**, **4**, and **5** suitable for X-ray diffraction analysis were coated in Paratone N oil and mounted on a MiTeGen MicroLoopTM. Crystallographic data for **1** and **2** were collected on a Rigaku diffractometer equipped with a MoK $\alpha$  sealed tube diffraction source with a graphite monochromator, and a Bruker APEX II detector. Data for **4** and **5** were acquired on a Rigaku XtaLab Synergy, single source at home/near, HyPix diffractometer equipped with a MoK $\alpha$  PhotonJet X-ray source. All datasets were collected at 100 K. Raw data were integrated and corrected for Lorentz and polarization effects with SAINT v8.27B.10 (for **1** and **2**) or CrysAlisPro 1.171.40.53 (for **4** and **5**)<sup>17</sup> Absorption corrections were applied using SADABS.<sup>18</sup> Space group assignments were determined by examination of systematic absences, E-statistics, and successive refinement of the structures. Structures were solved using direct methods in SHELXT and further refined with SHELXL-2013<sup>19</sup> operated with the OLEX2 interface.<sup>20</sup> Hydrogen atoms were placed in ideal positions and refined using a riding model for all structures. Structural parameters for **1–2** were obtained from single crystal X-ray diffraction experiments. (**Table S1–2**). Structural parameters for **3** were obtained from the literature reported crystal structure.<sup>21</sup> To ensure crystallographic similarity, powder X-ray diffraction samples of **3** were compared to simulated powder X-ray diffraction patterns obtained from Mercury with a full-width half-max of  $0.5^\circ$   $2\theta$ . A well-ground powder sample of **3** was sandwiched between pieces of Kapton tape. Powder X-ray diffraction patterns were collected on a STOE STADI MP diffractometer equipped with CuK $\alpha$  radiation.

The provided crystal structure of **1** shows a positional disorder of the complex in the unit cell with approximately 90% of the complexes of one orientation, and 10% with the antiparallel orientation. Solving the structure without the inclusion of this second orientation leads to a significant amount of unmodeled electron density, but because of the low occupation, there is significant disorder in modeling this orientation, resulting in an A-level and B-level alert. In **2**, there is a difficult to model, disordered, partially occupied water molecule in the crystal structure. The exact orientation of the oxygen atom causes a B-level alert, likely due to occupational disorder. In **2**, additional alerts were caused by the size of the crystal. Due

to the thinness of the crystal, we decided not to cut it in order to maximize our sample exposure to X-rays. This did however lead to a larger than ideal crystal, causing an A-level alert.

The reported structure of **3** was taken at room temperature (298 K) and is being compared to structures at 100 K. Though this temperature difference does make exact comparison of bond lengths difficult – our assignment of relative  $\tau_4'$  values are validated by comparison of the computed relaxed geometries (**Table S20**).

To confirm our determined crystal structure, we performed powder X-ray diffraction experiments on **1–3** at room temperature with CuK $\alpha$  (1.54065 Å) radiation (**Figure S5–S7**). The resulting diffraction patterns were compared to the predicted spectra from their single crystal structures. There is a slight shift in peak  $2\theta$  present in **1–2**, resulting from comparing powder patterns obtained at 300 K to crystal structures obtained at 100 K.

**Other Physical Measurements.** Infrared spectra were recorded on a Bruker Alpha FTIR spectrometer equipped with an attenuated total reflectance accessory and diamond anvil. Electrospray ionization mass spectrometry measurements were performed on MeOH/DCM solutions of **1–6** with Bruker AmaZon SL ESI-Ion Trap Mass Spectrometers at the IMSERC facility of Northwestern. UV-Vis spectra were collected on toluene solutions of **1–6** with a Varian Cary 5000 spectrophotometer.

**Discussion of sources of error in fitting variable temperature  $T_1$ .** In modeling these data, we focused on the direct process, the Raman process, and the local mode process. As all complexes are monometallic and  $S = \frac{1}{2}$ , an Orbach mechanism, which necessitates accessible low-lying spin states only available in higher spin systems or exchange coupled systems with multiple spin centers, is physically unreasonable and would lead to overparameterization.<sup>22,23</sup> Because the model used to fit the data (The Debye model) was derived for extended solid systems of much higher crystallographic symmetry (the highest symmetry examined in this report is orthorhombic whereas the Debye model was developed for cubic systems) there is a large degree of inherent error associated with the fit parameters for these systems.<sup>23,24</sup> The Debye temperature obtained from these fits is not an analogous parameter to the Debye temperature of ideal solids. In these systems, it is far better understood as metric representing the phonon energy of an individual lattice. Additionally, the Debye temperature and Raman coefficient  $B_{\text{Ram}}$  are heavily interdependent. It has been demonstrated that a change in  $B_{\text{Ram}}$  of approximately one order of magnitude can be offset by a change in the Debye temperature by approximately 30%.<sup>5</sup> This is typically corrected for by limiting the range of acceptable Debye temperatures to a range typically associated with molecular solids (between 50 K – and 120 K).<sup>22,24</sup> We use this to our advantage in fitting the OTP data to hold lattice phonon contributions constant. We first fit the data for **3''** with no parameters held constant, and with the aforementioned constraint on  $\Theta_D$ . This led to a fit  $\Theta_D$  of 65 K. We then used this as a representative  $\Theta_D$  for the OTP matrix, refit the data for **3''** with  $\Theta_D$  now held constant at 65 K, as well as fitting the  $T_1$  data for **1''–2''** as well.

Additionally, significant errors are associated with the direct process, because this mechanism is operative at the lowest temperatures of measurements and is typically fit to only the few data points below 10 K. The  $\Delta_{\text{Loc}}$  parameter heavily discussed in the main text represents some weighted average of all local modes contributing to spin-lattice relaxation. By the strictest definition, the term represents a single mode in the system. However, as we and others demonstrate, modeling these systems with only a single impactful local

mode is not accurate.<sup>25</sup> Technically, one could add additional  $C_{Loc} \frac{e^{\Delta_{Loc}/T}}{(e^{\Delta_{Loc}/T} - 1)^2}$  terms – one for each mode being modeled.<sup>26</sup> However, adding additional terms to the Debye model leads to problematic overparameterization.<sup>27</sup> Therefore, convention is to fit relaxation to a single  $\Delta_{loc}$  term, with the caveat that it is likely not representative of a true mode in the system, and instead gives information about the average of all modes in the system. As we demonstrate in the main text, this method does give partial information about vibrational modes responsible for relaxation, but does not paint a complete picture of the local modes process in molecular qubit candidates.

**Modeling of cw-EPR Spectra** cw-EPR spectra were modeled through the program EasySpin, run through MatLab.<sup>8</sup> In all systems, anisotropy in the  $g$ -tensors and hyperfine interaction ( $A$ -tensors) were considered. The hyperfine interaction is strongly distance dependence, and is generally only significant for the primary coordination sphere in transition metal systems. Therefore, the only atoms treated as having measurable hyperfine interactions in our model were the metal center and the nuclear spin bearing atoms of the primary coordination sphere (nitrogen in all systems). In an attempt to further reduce spin-spin broadening, we performed cw-EPR on 0.1 % by weight solutions of **1–3** in OTP (**1'''–3'''**). Linewidths remained largely consistent with the higher electronic spin concentration **1'–3'**, suggesting cw-EPR linewidths are not limited by interelectronic interactions, and are instead limited by interactions with nearby nuclear spins.

Both **1** and **3** were modeled with an anisotropic line broadening term. EasySpin supports modeling anisotropic strain with several different methods. To reduce the parameter space, we chose to model the systems with only a single source of line broadening. It should be noted, however, that likely a combination of many sources of anisotropy contribute to line broadening in each system. For **1'** and **1'''**, the most success was found using an “H-strain” term, an anisotropic smearing of magnetic parameters within the system causing broadening of the observed transitions. The choice to model with H-strain was made as there is no clear chemical origin of the anisotropy.

**3'** was best modeled with a “ $g$ -strain” parameter, which models an anisotropic distribution of  $g$  tensors existing in the crystal causing an anisotropic broadening of transitions. In the case of **3'**, the use of  $g$ -strain makes particular sense as, in the crystal structure of both **3** and **6**, the molecule occupies two unique positions in the solid-state crystal. In **3'**, **3** can occupy either of the two sites, and therefore has a cw-EPR spectra composited of 2 different molecules, with similar but distinct magnetic parameters. It is very likely that an even more accurate simulation could be made from specifically modeling two unique, uncoupled copper sites in the system. The existence of this broadening is highlighted by the significant decrease in anisotropic broadening in **3'''**, wherein the large “smear” of transitions around 340 mT is resolved into several distinguishable peaks. In **3'''**, the system could now be modeled with an isotropic Lorentzian.

Although the crystal structure of **2** also has two unique sites in the crystal, **2'** is well modeled with an isotropic Lorentzian. This is best understood as an effect of the different matrices the spins are in. Both **3** and **6** crystalize into the  $P2_1/c$  space group with two unique molecule sites per unit cell.<sup>21,28</sup> Although **2** and **5** both crystalize into the  $C2/c$  space group, the unit cell of **5** has one molecular site in the cell. When **2** is diluted into **5** to make **2'**, it substitutes into the crystal structure of **5**, and there is only 1 magnetic site the molecule can occupy. Therefore, strain effects are not observed, and we obtained the well resolved cw-EPR spectra reported in the main text (**Figure 2**). **2'''** was similarly modeled with a simple isotropic Lorentzian.

**Notes on Comparing Geometries of Different Complexes** The dihedral angle cited in the main text and in figures was defined as follows: A single subunit is defined as a 5-carbon chain with a main group donor atom located on the 2 and 4 carbons. In all three complexes, a plane was defined as the plane created by the two donor atoms on a NacNac or NacAc subunit and the metal center. Since each complex contained two subunits, the dihedral angle discussed in the paper is the angle between these two intersecting planes. As one would expect, it is large for a tetrahedral or pseudo tetrahedral molecule, and small for a square planar molecule.

There exist 2 common parameters which compare the geometry of four coordinate molecules to rank how similar they are to those geometric extremes –  $\tau_4$  and  $\tau_4'$ , defined as follows:

$$\begin{aligned}\tau_4 &= -0.00709\alpha - 0.00709\beta + 2.55 \\ \tau_4' &= -0.00399\alpha - 0.01019\beta + 2.55\end{aligned}$$

Where  $\alpha$  and  $\beta$  are the two largest valence angles in the complex.<sup>29,30</sup> Although the parameters are similar at the extreme (0 being perfectly square planar, 1 being perfectly tetrahedral),  $\tau_4'$  uniquely identifies the  $\alpha$  and  $\beta$  angles of the complex, and therefore better highlights the unique distortions between structures.

**Computational Details** Vibrational modes, stiffness, and spin density for each of the molecules was calculated using the  $\Gamma$ -point version of VASP<sup>31–33</sup> with the Perdew–Burke–Ernzerhof (PBE) functional. A plane wave cutoff of 600 eV, an augmentation grid plane wave cutoff of 2400 eV, and an energy convergence of  $10^{-8}$  eV was used for all VASP calculations. Molecular structures were extracted from experimental crystal structures, giving a gas phase approximation. The structures were relaxed with a force convergence of  $5 \times 10^{-5}$  meV/Å and a minimum of 10 Å gap between the molecule and its periodic images was used. The vibrational modes were calculated from a dynamical matrix populated using finite displacements of 0.01 Å of each atom. The vibrational density of states was calculated via a gaussian folding method with a width of 4  $\text{cm}^{-1}$ .<sup>34</sup> The intensities of each mode were normalized to one. Eigenvalues of each mode were projected onto individual atoms and then summed by atom type to give the full atom projected density of states.

Local stiffness of the Cu atoms was found by fitting the local potential energy  $U$ , with the equation:

$$U = U_0 + \frac{1}{2}(\Delta r)^T H(\Delta r) \quad (1)$$

Where  $U_0$  is reference potential energy,  $\Delta r$  is the finite displacement vector from the equilibrium position, and  $H$  is the matrix of second order polynomial terms approximating the Hessian matrix. Finite displacements were evaluated on a  $5 \times 5 \times 5$  grid around the equilibrium position in increments of 0.01 Å. Spin density is shown with an isosurface containing 70 percent of the density.

The structures were re-relaxed with ORCA<sup>35</sup> version 4.0.1.2 using the B3LYP functional<sup>36–39</sup> and the def2-TZVP<sup>40</sup> basis set with the def2-JK<sup>41</sup> auxiliary basis set. Hyperfine coupling and g-tensor calculations were performed on these re-relaxed structures using the ORCA program. All g-tensor calculations used the same functional and basis set as the relaxations. For hyperfine coupling the functional and basis set remained the same as other ORCA calculations with the exception that the triply polarized basis set CP(PPP)<sup>12</sup> was used for the Cu atom. For all ORCA calculations, tight SCF convergence criteria (giving an energy change of  $2.7211 \times 10^{-7}$  eV) and DFT integration grid 6 (Lebedev 590 points for the angular grid and

the IntAcc parameter set to 5.34 for the radial grid) were used. A tighter DFT integration, grid 7, was used around the Cu atom (Lebedev 770 points for the angular grid and the IntAcc parameter set to 5.67 for the radial grid). These settings allowed for calculation of  $g$ -tensor values that were converged to  $1 \times 10^{-4}$ . The  $g$ -tensor and hyperfine couplings to the vibrational modes were calculated for each normal mode with five amplitudes, four between 0.02 and 0.08 Å. One additional amplitude at  $-0.08$  Å was also computed to indicate if the changes in the  $g$ -tensor with respect to mode amplitude were even or odd for a given mode. All  $g$ -tensor data for distorted structures was fit to a linear model and a quadratic model to determine the best fit for each mode. For the linear model the data was fit to **Equation 2**, where  $g_{eq}$  is the equilibrium  $g$ -tensor value,  $d_{amplitude}$  is the amplitude of the distortion applied to the equilibrium structure, and  $g_{dis}$  is the  $g$ -tensor value for the distorted structure.

$$g_{dis} = (b * d_{amplitude}) + g_{eq} \quad (2)$$

For the quadratic model a similar method was used with **Equation 3**.

$$g_{dis} = (a * d_{amplitude}^2) + g_{eq} \quad (3)$$

The calculated  $g$ -tensors for each distorted structure showed that modes with significant coupling, greater than  $10^{-3}$  Å<sup>-1</sup>, were well described by a linear approximation with most modes having an  $r^2$  value above 0.95 (**Table 27-S29**). Several of these strongly coupled modes for **1** show a “V-shaped” behavior and are identified in **Table S27**. Modes that were well described by a quadratic approximation all have coupling constants below  $10^{-3}$  Å<sup>-1</sup>. Occasionally a mode could not be fit to a quadratic approximation due to the value being constant with respect to displacement. Displacements where this occurs are notated with “nan” in **Table S27–S44**. The linear approximation of the first derivative of the  $g$ -tensor with respect to the phonon modes, was then used to calculate a weighted spin phonon coupling (**Equation 4**)

$$V_{sph}^2 = \sum_{Q=0}^{Q=n} \left( \left( \frac{\partial g}{\partial Q} \right)^2 \int_{Tmin}^{Tmax} \frac{1}{\frac{\omega_Q}{k_b T} - 1} dT \right) \quad (4)$$

Where  $\omega$ , is the frequency of the mode and  $k_b$  is Boltzmann’s constant. Temperature,  $T$ , ranges from 0–300 K and  $Q$  ranges from 0 to  $n$  where  $n$  is the number of real modes in the frequency range 0–500 cm<sup>-1</sup>. This range was chosen as representative of all modes with a realistic thermal occupancy.

To analyze the perturbation of the primary coordination sphere during relaxation, we applied a bond distance that computes the average distance between the copper cation (C) and every nitrogen donor (N) with respect to each axis (**Equation 5**).

$$d_{Cu-N} = \frac{\sum_{k=1}^4 \left( \sum_{i=1}^3 (C_i - N_{k_i})^2 \right)^{\frac{1}{2}}}{4} \quad (5)$$

This metric was calculated for every distorted structure and then fit to a linear model with the distortion amplitude to determine the change in the bond length metric with respect to distortion amplitude. Larger  $d_{Cu-N}$  values indicate more distortion in the primary coordination sphere along a vibrational mode. For **2**, this metric was altered slightly to include the perturbation in the donor oxygen atoms as well. The description and calculation are identical, treating oxygen displacement identically to nitrogen displacement. To identify the unique environment, the parameters was termed  $d_{Cu-E}$ .

A simple thermal model based off the work of Kazmierczak et al<sup>42</sup> was used to calculate  $T_1$  for all three molecules. The model weights the SPC coefficients by their Bose-Einstein occupancy and then is normalized with experimental  $T_1$  data for Cu(tmtaa) in o-Terphenyl (eq. 6). A constant normalization factor ( $a$ ) was determined from the data at 160K.

$$T_1 = \frac{a}{\sum_{Q=0}^N \left( \frac{\partial g}{\partial Q} \right)^2 \frac{e^{\frac{w_Q}{k_b T}}}{(e^{\frac{w_Q}{k_b T}} - 1)^2}} \quad (6)$$

$$a = \frac{SPC_{weighted}(160\text{ K})}{T_{1,exp}(160\text{ K})}$$

**Comparison of PDOS with Experimental Raman and IR Spectra:** The gas phase approximation was used for phonon calculations. This has been demonstrated to cause discrepancies at very low frequencies due to the lack of lattice modes present in the approximation.<sup>27</sup>

Direct comparison of predicted vibrational behavior to experimental results is difficult. While calculations necessitate ignoring the local matrix environment to prevent the exponential scaling of computational difficulty, these factors necessarily impact vibrational modes, both in energy and in oscillator strength. As such, we wish to stress that our results from DFT calculations cannot be 1:1 mapped onto experimental results in real matrices. For example, the vibrational modes predicted at 129  $\text{cm}^{-1}$  for **2** that is heavily discussed in the main text, may be shifted by tens of wavenumbers in energy in a real matrix, and these shifts could also shift the predicted spin-phonon coupling of those vibrational terms. As such, we only use our model to guide our understanding of experimental results, and stress that a direct comparison of experimental and theoretical vibrational energies is non-trivial.

Despite these approximations, most Raman modes match closely with a computed mode, giving an overall low root mean square error of 19.73, 17.13, and 11.74  $\text{cm}^{-1}$  for **1–3** respectively. This error is similar to that found in other four coordinate copper complexes.<sup>43</sup>

**Table S1** | Crystallographic information for the structural refinement of **1**.

|                                                                 |                                                                                                                             |
|-----------------------------------------------------------------|-----------------------------------------------------------------------------------------------------------------------------|
| Empirical Formula                                               | C <sub>12</sub> H <sub>26</sub> N <sub>4</sub> Cu                                                                           |
| Formula weight                                                  | 313.93                                                                                                                      |
| Temperature                                                     | 101.0(2)K                                                                                                                   |
| Wavelength                                                      | 0.71073 Å                                                                                                                   |
| Crystal System                                                  | Orthorhombic                                                                                                                |
| Space Group                                                     | <i>Pbcn</i>                                                                                                                 |
| Unit Cell Dimensions                                            | $a = 11.819(2)$ Å, $\alpha = 90^\circ$<br>$b = 12.632(2)$ Å, $\beta = 90^\circ$<br>$c = 10.1183(16)$ Å, $\gamma = 90^\circ$ |
| Volume                                                          | 1510.7(4) Å <sup>3</sup>                                                                                                    |
| Z                                                               | 4                                                                                                                           |
| Density (calculated)                                            | 1.493 Mg/m <sup>3</sup>                                                                                                     |
| Absorption coefficient                                          | 1.436 mm <sup>-1</sup>                                                                                                      |
| $F_{000}$                                                       | 732.0                                                                                                                       |
| Crystal color                                                   | Purple                                                                                                                      |
| Crystal size                                                    | 0.378 × 0.133 × 0.061 mm <sup>3</sup>                                                                                       |
| $\theta$ range                                                  | 4.018 to 48.464°                                                                                                            |
| Index ranges                                                    | $-19 \leq h \leq 19$<br>$-20 \leq k \leq 20$<br>$-6 \leq l \leq 16$                                                         |
| Reflections collected                                           | 45870                                                                                                                       |
| Independent reflections                                         | 3754 [ $R_{\text{int}} = 0.0461$ ]                                                                                          |
| Completeness to $\theta = 52.48^\circ$                          | 100 %                                                                                                                       |
| Absorption correction                                           | Multi-scan                                                                                                                  |
| Maximum and minimum transmission                                | 0.655 and 0.745                                                                                                             |
| Refinement method                                               | Full-matrix least-squares on $F^2$                                                                                          |
| Data / restraints / parameters                                  | 3754 / 0 / 191                                                                                                              |
| Goodness-of-fit on $F^2$ <sup>a</sup>                           | 1.038                                                                                                                       |
| Final $R$ indices [ $I > 2\sigma(I) = 17728$ data] <sup>b</sup> | $R_1 = 3.11$ %, $wR_2 = 7.29$ %                                                                                             |
| $R$ indices (all data, 0.80 Å)                                  | $R_1 = 4.97$ %, $wR_2 = 8.04$ %                                                                                             |
| Largest diff. peak and hole                                     | 0.57 and -0.51 e/Å <sup>-3</sup>                                                                                            |

<sup>a</sup> GooF =  $[\Sigma[w(F_o^2 - F_c^2)^2] / (n-p)]^{1/2}$  where n is the number of reflections and p is the total number of parameters refined. <sup>b</sup>  $R_1 = \Sigma||F_o| - |F_c|| / \Sigma|F_o|$ ;  $wR_2 = [\Sigma[w(F_o^2 - F_c^2)^2] / \Sigma[w(F_o^2)^2]]^{1/2}$

**Table S2** | Crystallographic information for the structural refinement of **2**.

|                                                                |                                                                                                                                       |
|----------------------------------------------------------------|---------------------------------------------------------------------------------------------------------------------------------------|
| Empirical Formula                                              | C <sub>12</sub> H <sub>18</sub> N <sub>2</sub> O <sub>2</sub> Cu·0.25(H <sub>2</sub> O)                                               |
| Formula weight                                                 | 285.82 g/mol                                                                                                                          |
| Temperature                                                    | 100.0(1) K                                                                                                                            |
| Wavelength                                                     | 0.71073 Å                                                                                                                             |
| Crystal System                                                 | Monoclinic                                                                                                                            |
| Space Group                                                    | <i>C2/c</i>                                                                                                                           |
| Unit Cell Dimensions                                           | $a = 34.5263(12)$ Å, $\alpha = 90.0^\circ$<br>$b = 7.5707$ Å, $\beta = 107.444(2)^\circ$<br>$c = 19.7874(7)$ Å, $\gamma = 90.0^\circ$ |
| Volume                                                         | 4935.3(3) Å <sup>3</sup>                                                                                                              |
| Z                                                              | 16                                                                                                                                    |
| Density (calculated)                                           | 1.545 Mg/m <sup>3</sup>                                                                                                               |
| Absorption coefficient                                         | 1.762 mm <sup>-1</sup>                                                                                                                |
| $F_{000}$                                                      | 2395.0                                                                                                                                |
| Crystal color                                                  | Purple Red                                                                                                                            |
| Crystal size                                                   | 1.478 × 0.179 × 0.103 mm <sup>3</sup>                                                                                                 |
| $\theta$ range                                                 | 2.472 to 56.792°                                                                                                                      |
| Index ranges                                                   | $-46 \leq h \leq 46$<br>$-9 \leq k \leq 11$<br>$-28 \leq l \leq 28$                                                                   |
| Reflections collected                                          | 118739                                                                                                                                |
| Independent reflections                                        | 7387 [ $R_{\text{int}} = 0.0562$ ]                                                                                                    |
| Completeness to $\theta = 52.48^\circ$                         | 100.0 %                                                                                                                               |
| Absorption correction                                          | Multi-scan                                                                                                                            |
| Maximum and minimum transmission                               | 0.7462 and 0.6631                                                                                                                     |
| Refinement method                                              | Full-matrix least-squares on $F^2$                                                                                                    |
| Data / restraints / parameters                                 | 7387 / 0 / 324                                                                                                                        |
| Goodness-of-fit on $F^{2a}$                                    | 0.971                                                                                                                                 |
| Final $R$ indices [ $I > 2\sigma(I) = 4426$ data] <sup>b</sup> | $R_1 = 3.60$ %, $wR_2 = 11.48$ %                                                                                                      |
| $R$ indices (all data, 0.80 Å)                                 | $R_1 = 5.90$ %, $wR_2 = 13.58$ %                                                                                                      |
| Largest diff. peak and hole                                    | 0.85 and $-0.88$ e/Å <sup>-3</sup>                                                                                                    |

<sup>a</sup> GooF =  $[\Sigma[w(F_o^2 - F_c^2)^2] / (n-p)]^{1/2}$  where n is the number of reflections and p is the total number of parameters refined. <sup>b</sup>  $R_1 = \Sigma||F_o| - |F_c|| / \Sigma|F_o|$ ;  $wR_2 = [\Sigma[w(F_o^2 - F_c^2)^2] / \Sigma[w(F_o^2)^2]]^{1/2}$

**Table S4** | Crystallographic information for the structural refinement of **4**.

|                                                                 |                                                                                                                              |
|-----------------------------------------------------------------|------------------------------------------------------------------------------------------------------------------------------|
| Empirical Formula                                               | C <sub>14</sub> H <sub>26</sub> N <sub>4</sub> Zn                                                                            |
| Formula weight                                                  | 315.78 g/mol                                                                                                                 |
| Temperature                                                     | 100.00(1)                                                                                                                    |
| Wavelength                                                      | 0.71073 Å                                                                                                                    |
| Crystal System                                                  | orthorhombic                                                                                                                 |
| Space Group                                                     | <i>Pbcn</i>                                                                                                                  |
| Unit Cell Dimensions                                            | $a = 12.0640(4)$ Å, $\alpha = 90^\circ$<br>$b = 11.9611(5)$ Å, $\beta = 90^\circ$<br>$c = 10.8780(3)$ Å, $\gamma = 90^\circ$ |
| Volume                                                          | 1570.34(9) Å <sup>3</sup>                                                                                                    |
| Z                                                               | 4                                                                                                                            |
| Density (calculated)                                            | 1.326 Mg/m <sup>3</sup>                                                                                                      |
| Absorption coefficient                                          | 1.558 mm <sup>-1</sup>                                                                                                       |
| $F_{000}$                                                       | 672.0                                                                                                                        |
| Crystal color                                                   | White (Transparent)                                                                                                          |
| Crystal size                                                    | 0.364 × 0.095 × 0.072 mm <sup>3</sup>                                                                                        |
| $\theta$ range                                                  | 4.794 to 71.472°                                                                                                             |
| Index ranges                                                    | $-13 \leq h \leq 18$<br>$-16 \leq k \leq 18$<br>$-17 \leq l \leq 15$                                                         |
| Reflections collected                                           | 13850                                                                                                                        |
| Independent reflections                                         | 3287 [ $R_{\text{int}} = 0.0317$ ]                                                                                           |
| Completeness to $\theta = 52.48^\circ$                          | 100 %                                                                                                                        |
| Absorption correction                                           | Multi-scan                                                                                                                   |
| Maximum and minimum transmission                                | 1.000 and 0.561                                                                                                              |
| Refinement method                                               | Full-matrix least-squares on $F^2$                                                                                           |
| Data / restraints / parameters                                  | 3287 / 0 / 91                                                                                                                |
| Goodness-of-fit on $F^2$ <sup>a</sup>                           | 1.025                                                                                                                        |
| Final $R$ indices [ $I > 2\sigma(I) = 19146$ data] <sup>b</sup> | $R_1 = 2.83$ %, $wR_2 = 6.87$ %                                                                                              |
| $R$ indices (all data, 0.80 Å)                                  | $R_1 = 4.47$ %, $wR_2 = 7.57$ %                                                                                              |
| Largest diff. peak and hole                                     | 0.49 and -0.45 e/Å <sup>-3</sup>                                                                                             |

<sup>a</sup> GooF =  $[\Sigma[w(F_o^2 - F_c^2)^2] / (n-p)]^{1/2}$  where n is the number of reflections and p is the total number of parameters refined. <sup>b</sup>  $R_1 = \Sigma||F_o| - |F_c|| / \Sigma|F_o|$ ;  $wR_2 = [\Sigma[w(F_o^2 - F_c^2)^2] / \Sigma[w(F_o^2)^2]]^{1/2}$

**Table S4** | Crystallographic information for the structural refinement of **5**.

|                                                                 |                                                                                                                                         |
|-----------------------------------------------------------------|-----------------------------------------------------------------------------------------------------------------------------------------|
| Empirical Formula                                               | C <sub>12</sub> H <sub>18</sub> NiN <sub>2</sub> O <sub>2</sub> ·0.5(H <sub>2</sub> O)                                                  |
| Formula weight                                                  | 291.01 g/mol                                                                                                                            |
| Temperature                                                     | 100(2) K                                                                                                                                |
| Wavelength                                                      | 0.71073 Å                                                                                                                               |
| Crystal System                                                  | Monoclinic                                                                                                                              |
| Space Group                                                     | C2/c                                                                                                                                    |
| Unit Cell Dimensions                                            | $a = 22.1196(18)$ Å, $\alpha = 90.0^\circ$<br>$b = 8.3402(6)$ Å, $\beta = 128.021(5)^\circ$<br>$c = 17.740(2)$ Å, $\gamma = 90.0^\circ$ |
| Volume                                                          | 2578.1(3) Å <sup>3</sup>                                                                                                                |
| Z                                                               | 8                                                                                                                                       |
| Density (calculated)                                            | 1.499 Mg/m <sup>3</sup>                                                                                                                 |
| Absorption coefficient                                          | 1.502 mm <sup>-1</sup>                                                                                                                  |
| $F_{000}$                                                       | 1232.0                                                                                                                                  |
| Crystal color                                                   | Orange Red                                                                                                                              |
| Crystal size                                                    | 0.564 × 0.115 × 0.078 mm <sup>3</sup>                                                                                                   |
| $\theta$ range                                                  | 4.676 to 57.206°                                                                                                                        |
| Index ranges                                                    | $-29 \leq h \leq 29$<br>$-11 \leq k \leq 11$<br>$-23 \leq l \leq 23$                                                                    |
| Reflections collected                                           | 20696                                                                                                                                   |
| Independent reflections                                         | 3272 [ $R_{\text{int}} = 0.1044$ ]                                                                                                      |
| Completeness to $\theta = 52.48^\circ$                          | 100 %                                                                                                                                   |
| Absorption correction                                           | Multi-scan                                                                                                                              |
| Maximum and minimum transmission                                | 0.7457 and 0.5825                                                                                                                       |
| Refinement method                                               | Full-matrix least-squares on $F^2$                                                                                                      |
| Data / restraints / parameters                                  | 3272 / 0 / 166                                                                                                                          |
| Goodness-of-fit on $F^{2a}$                                     | 1.022                                                                                                                                   |
| Final $R$ indices [ $I > 2\sigma(I) = 10408$ data] <sup>b</sup> | $R_1 = 4.81$ %, $wR_2 = 10.44$ %                                                                                                        |
| $R$ indices (all data, 0.80 Å)                                  | $R_1 = 7.98$ %, $wR_2 = 11.70$ %                                                                                                        |
| Largest diff. peak and hole                                     | 0.64 and $-0.72$ e/Å <sup>-3</sup>                                                                                                      |

<sup>a</sup> GooF =  $[\Sigma[w(F_o^2 - F_c^2)^2] / (n-p)]^{1/2}$  where  $n$  is the number of reflections and  $p$  is the total number of parameters refined. <sup>b</sup>  $R_1 = \Sigma||F_o| - |F_c|| / \Sigma|F_o|$ ;  $wR_2 = [\Sigma[w(F_o^2 - F_c^2)^2] / \Sigma[w(F_o^2)^2]]^{1/2}$

**Table S5** | Highlighted structural parameters for **1–3**. In the case of **1** and **3**, E<sub>1</sub> and E<sub>2</sub> are nitrogen atoms. In the case of **2**, E<sub>1</sub> and E<sub>2</sub> are oxygen atoms. **2** and **3** have two unique positions in the unit cell with slightly different geometries, both of which are described.

| Parameter                               | <b>1</b> | <b>2</b> | <b>3</b> | <b>4</b> | <b>5</b> | <b>6</b> |
|-----------------------------------------|----------|----------|----------|----------|----------|----------|
| Dihedral Angle                          | 60.8°    | 4.2°     | 6.1°     | 75.33°   | 1.86°    | 2.7°     |
| M-N <sub>1</sub>                        | 1.954    | 1.931    | 1.935    | 1.989    | 1.849    | 1.874    |
| M-N <sub>2</sub>                        | 1.955    | 1.928    | 1.926    | 1.995    | 1.845    | 1.874    |
| M-E <sub>1</sub>                        | 1.955    | 1.920    | 1.922    | 1.989    | 1.856    | 1.875    |
| M-E <sub>2</sub>                        | 1.955    | 1.916    | 1.944    | 1.995    | 1.850    | 1.881    |
| M-N/E <sub>avg</sub>                    | 1.955    | 1.924    | 1.932    | 1.992    | 1.850    | 1.876    |
| N <sub>1</sub> -M-E <sub>1</sub>        | 94.83°   | 93.98    | 95.07    | 95.98    | 94.75    | 94.67    |
| N <sub>1</sub> -M-E <sub>2</sub>        | 100.59°  | 175.34°  | 176.53°  | 125.99°  | 177.79°  | 176.83°  |
| N <sub>1</sub> -M-N <sub>2</sub>        | 136.33°  | 85.98°   | 84.19°   | 95.98°   | 87.23°   | 84.81°   |
| N <sub>2</sub> -M-E <sub>1</sub>        | 101.58°  | 86.28°   | 96.14°   | 108.63°  | 94.71°   | 95.20°   |
| N <sub>2</sub> -M-E <sub>2</sub>        | 94.83°   | 174.87°  | 175.19°  | 125.99°  | 177.44°  | 179.32°  |
| E <sub>1</sub> -M-E <sub>2</sub>        | 136.17°  | 86.08°   | 84.32°   | 108.63°  | 83.30°   | 85.30°   |
| $\tau_4'$                               | 0.62     | 0.066    | 0.052    | 0.76     | 0.030    | 0.017    |
| Second Site in Unit Cell                |          |          |          |          |          |          |
| M-N <sub>1</sub>                        | ---      | 1.936    | 1.925    | ---      | ---      | 1.853    |
| M-N <sub>2</sub>                        | ---      | 1.934    | 1.929    | ---      | ---      | 1.871    |
| M-E <sub>1</sub>                        | ---      | 1.919    | 1.927    | ---      | ---      | 1.853    |
| M-E <sub>2</sub>                        | ---      | 1.920    | 1.925    | ---      | ---      | 1.877    |
| Cu-N/E <sub>avg</sub>                   | ---      | 1.925    | 1.927    | ---      | ---      | 1.863    |
| N <sub>1</sub> -M-E <sub>1</sub>        | ---      | 93.70    | 95.79°   | ---      | ---      | 93.98°   |
| N <sub>1</sub> -M-E <sub>2</sub>        | ---      | 177.41°  | 177.15°  | ---      | ---      | 179.09°  |
| N <sub>1</sub> -M-N <sub>2</sub>        | ---      | 85.54°   | 84.019°  | ---      | ---      | 85.60°   |
| N <sub>2</sub> -M-E <sub>1</sub>        | ---      | 177.47°  | 84.46°   | ---      | ---      | 177.40°  |
| N <sub>2</sub> -M-E <sub>2</sub>        | ---      | 93.60°   | 95.45°   | ---      | ---      | 85.27°   |
| E <sub>1</sub> -M-E <sub>2</sub>        | ---      | 93.60°   | 95.45°   | ---      | ---      | 95.10°   |
| $\tau_4'$                               | ---      | 0.030    | 0.049    | ---      | ---      | 0.017    |
| Avg Cu-N between both sites in <b>3</b> | ---      | 1.9245   | 1.9295   | ---      | ---      | 1.870    |

**Table S6** | Highlighted structural parameters for **1–3** relaxed with the B3LYP functional. In the case of **1** and **3**, E<sub>1</sub> and E<sub>2</sub> are nitrogen atoms. In the case of **2**, E<sub>1</sub> and E<sub>2</sub> are oxygen atoms.

| Parameter                         | <b>1</b> | <b>2</b> | <b>3</b> |
|-----------------------------------|----------|----------|----------|
| Dihedral Angle                    | 50.3°    | 10.0°    | 6.1°     |
| Cu-N <sub>1</sub>                 | 1.990    | 1.959    | 1.945    |
| Cu-N <sub>2</sub>                 | 1.990    | 1.959    | 1.944    |
| Cu-E <sub>1</sub>                 | 1.990    | 1.943    | 1.944    |
| Cu-E <sub>2</sub>                 | 1.990    | 1.943    | 1.945    |
| Cu-N/E <sub>avg</sub>             | 1.990    | 1.951    | 1.945    |
| N <sub>1</sub> -Cu-E <sub>1</sub> | 94.41    | 93.80    | 95.69    |
| N <sub>1</sub> -Cu-E <sub>2</sub> | 98.88    | 172.59   | 176.84   |
| N <sub>1</sub> -Cu-N <sub>2</sub> | 140.16   | 85.97    | 84.21    |
| N <sub>2</sub> -Cu-E <sub>1</sub> | 99.07    | 172.62   | 84.22    |
| N <sub>2</sub> -Cu-E <sub>2</sub> | 94.41    | 93.80    | 95.70    |
| E <sub>1</sub> -Cu-E <sub>2</sub> | 140.02   | 87.37    | 176.90   |
| $\tau_4'$                         | 0.5631   | 0.1024   | 0.0418   |

**Table S7** | Highlighted structural parameters for **1–3** relaxed with the PBE functional. In the case of **1** and **3**, E<sub>1</sub> and E<sub>2</sub> are nitrogen atoms. In the case of **2**, E<sub>1</sub> and E<sub>2</sub> are oxygen atoms.

| Parameter                         | <b>1</b> | <b>2</b> | <b>3</b> |
|-----------------------------------|----------|----------|----------|
| Dihedral Angle                    | 56.4°    | 10.0°    | 6.1°     |
| Cu-N <sub>1</sub>                 | 1.971    | 1.949    | 1.938    |
| Cu-N <sub>2</sub>                 | 1.971    | 1.949    | 1.938    |
| Cu-E <sub>1</sub>                 | 1.971    | 1.943    | 1.938    |
| Cu-E <sub>2</sub>                 | 1.971    | 1.943    | 1.938    |
| Cu-N/E <sub>avg</sub>             | 1.990    | 1.946    | 1.938    |
| N <sub>1</sub> -Cu-E <sub>1</sub> | 95.96    | 93.80    | 95.59    |
| N <sub>1</sub> -Cu-E <sub>2</sub> | 101.67   | 172.59   | 179.43   |
| N <sub>1</sub> -Cu-N <sub>2</sub> | 133.87   | 85.97    | 84.41    |
| N <sub>2</sub> -Cu-E <sub>1</sub> | 101.77   | 172.62   | 84.41    |
| N <sub>2</sub> -Cu-E <sub>2</sub> | 95.96    | 93.80    | 95.59    |
| E <sub>1</sub> -Cu-E <sub>2</sub> | 133.87   | 87.37    | 179.45   |
| $\tau_4'$                         | 0.6517   | 0.1024   | 0.0055   |

**a**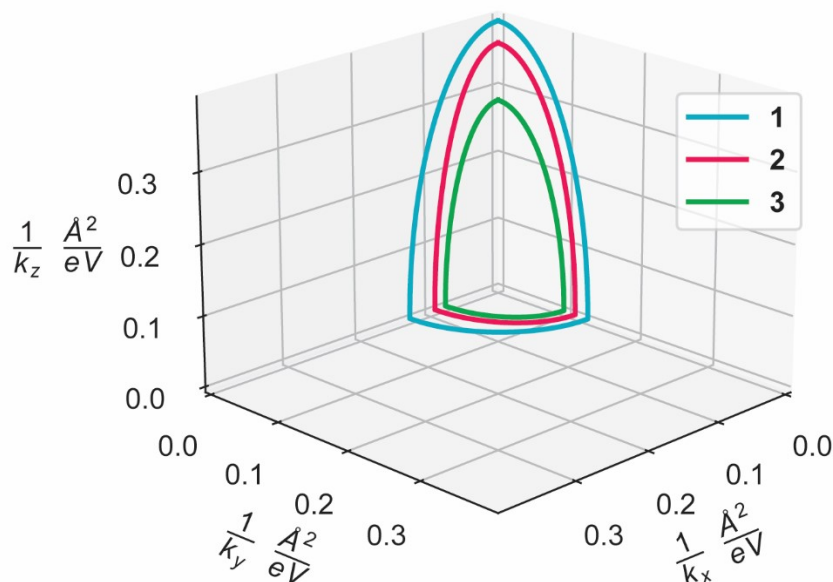**b**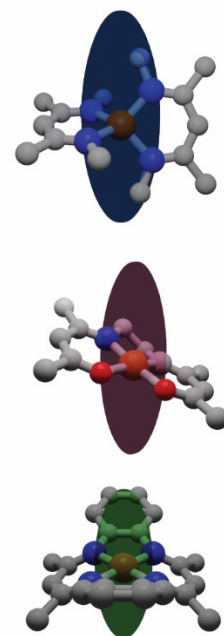

**Figure S1** | Compliance of the copper metal center for **1–3**. A larger value indicates that there is less resistance to motion of the copper along that axis. Though this metric does not fully capture the rigidity of ligand  $\pi$ -bonds, it does demonstrate how tightly bound the spin bearing metal center is in the binding pocket. **(a)** Compliance ellipsoids for **1–3** viewed on the same axis. The compliance increases in the order of **1** < **2** < **3** in all directions. The compliance of **3** is markedly reduced (rigidity increased) compared to **1** and **2** in all directions. **2** and **3** have similar compliance in the xy plane, likely as a result of the square planar geometry. **(b)** Compliance ellipsoids visualized over the molecular structures of **1–3**.

**Table S8** | The energies of the spin-up and spin down molecular orbitals in **1** derived from the atomic d orbitals, as well as the percent-d orbital character of the molecular orbital. The HOMO orbital of the system (the highest energy orbital with an occupancy of 1) is arbitrarily set to 0 eV.

| d Orbital     | Spin-up Orbital<br>Energy (eV) | d Orbital<br>Character (%) | Spin-down Orbital<br>Energy (eV) | d Orbital<br>Character (%) |
|---------------|--------------------------------|----------------------------|----------------------------------|----------------------------|
| $d_{xz}$      | -3.280                         | 35.6                       | -2.843                           | 47.4                       |
| $d_{yz}$      | -3.178                         | 55.0                       | -2.736                           | 74.2                       |
| $d_{xy}$      | -3.042                         | 75.5                       | -2.485                           | 36.3                       |
| $d_z^2$       | -2.335                         | 47.1                       | -1.146                           | 42.4                       |
| $d_{x^2-y^2}$ | 0                              | 20.1                       | 3.952                            | 58.1                       |

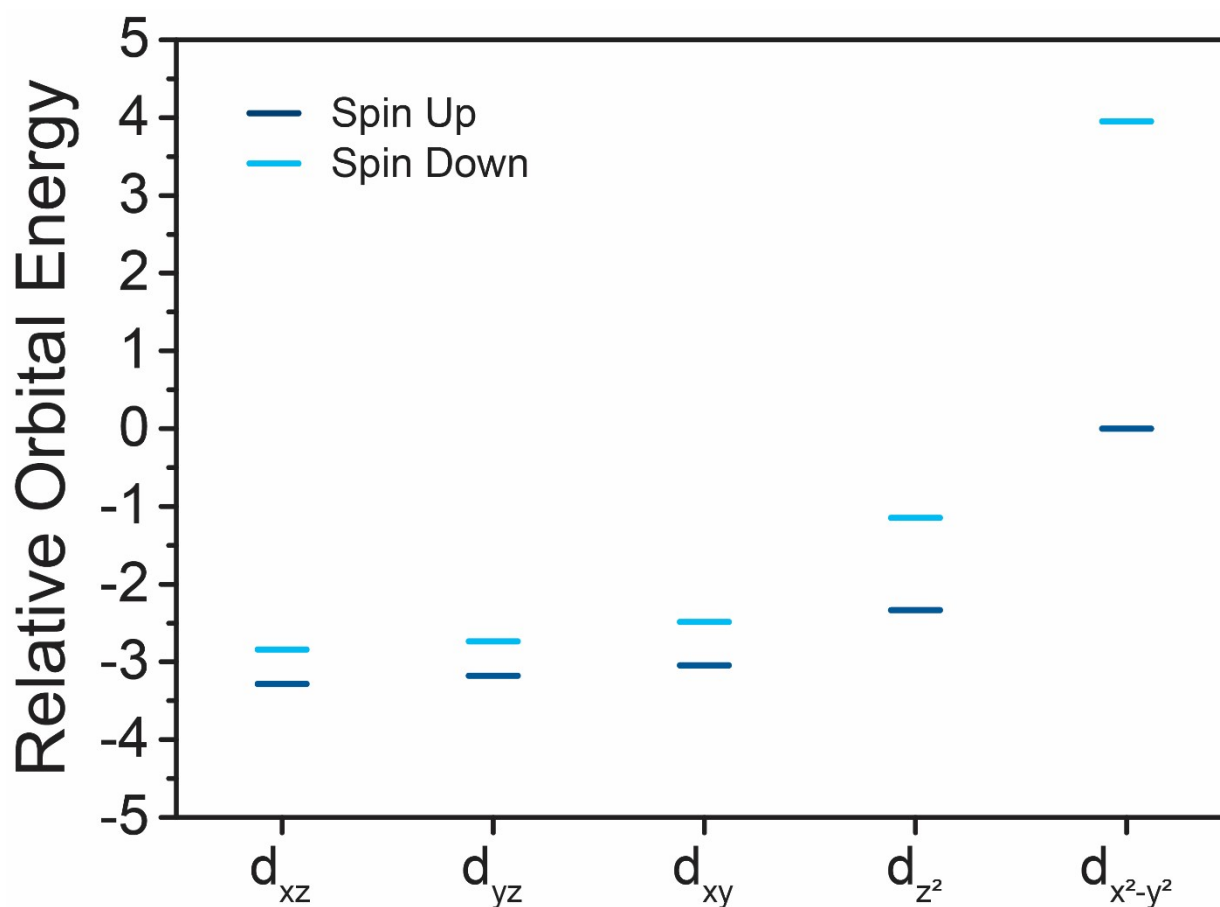

**Figure S2** | Energy of the spin-up and spin-down molecular orbitals derived from the copper d-orbitals in **1** (in eV), and the percent character of the molecular orbital comprised of the atomic d-orbital. Numbers index molecular orbitals in ascending energy. The HOMO orbital is assigned to 0 eV. The displayed orbitals are the five orbitals with the highest %d-orbital character.

**Table S9** | The energies of the spin-up and spin down molecular orbitals in **2** derived from the atomic d orbitals, as well as the percent-d orbital character of the molecular orbital. The HOMO orbital of the system (the highest energy orbital with an occupancy of 1) is arbitrarily set to 0 eV.

| d Orbital     | Spin-up Orbital<br>Energy (eV) | d Orbital<br>Character (%) | Spin-down Orbital<br>Energy (eV) | d Orbital<br>Character (%) |
|---------------|--------------------------------|----------------------------|----------------------------------|----------------------------|
| $d_{xy}$      | -3.533                         | 56.1                       | -3.240                           | 62.4                       |
| $d_{z^2}$     | -3.145                         | 35.6                       | -2.797                           | 31.8                       |
| $d_{yz}$      | -2.866                         | 39.7                       | -2.600                           | 23.7                       |
| $d_{xz}$      | -2.399                         | 20.7                       | -2.181                           | 35.9                       |
| $d_{x^2-y^2}$ | 0                              | 20.9                       | 3.877                            | 53.4                       |

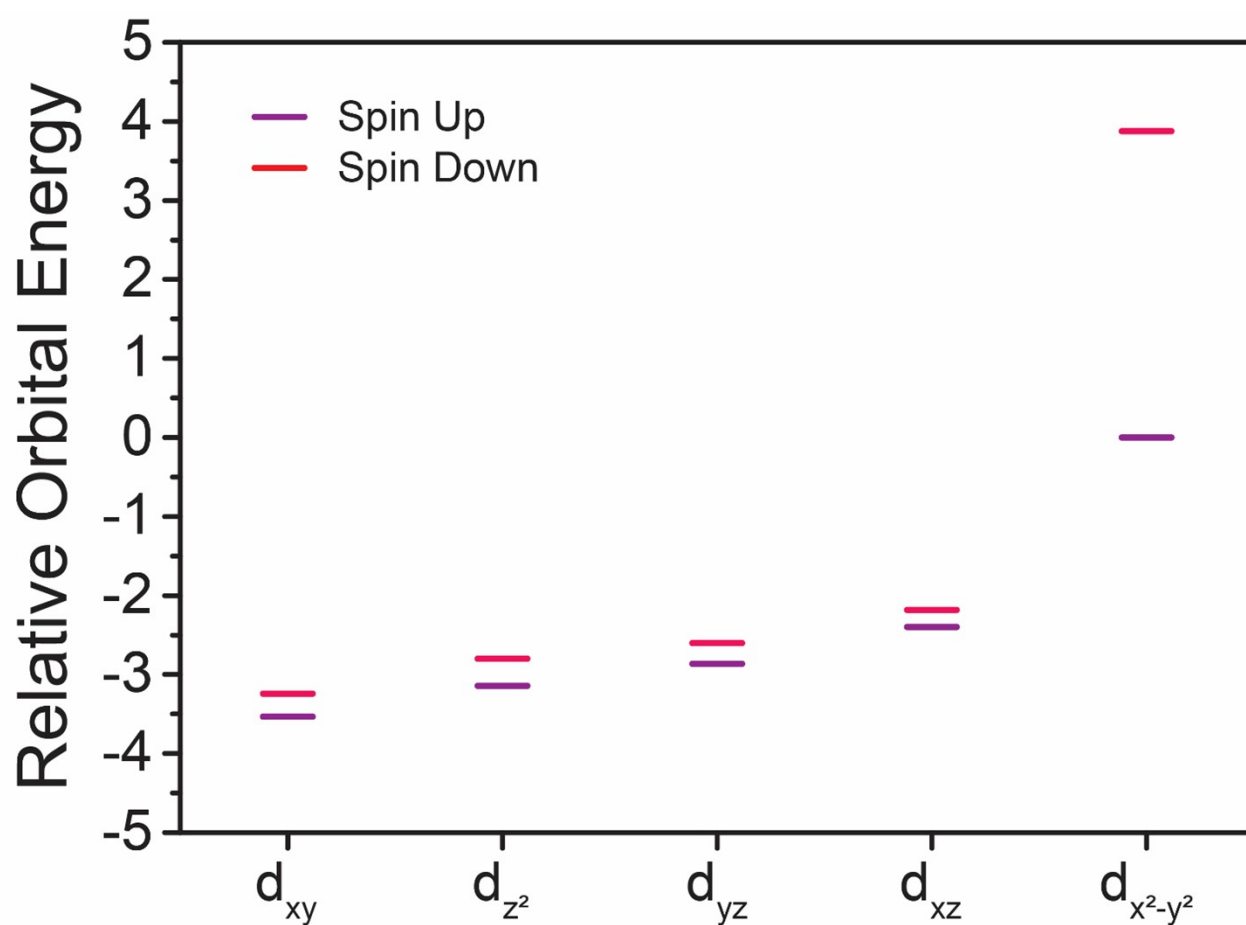

**Figure S3** | Energy of the spin-up and spin-down molecular orbitals derived from the copper d-orbitals in **2** (in eV) and the percent character of the molecular orbital comprised of the atomic d-orbital. Numbers index molecular orbitals in ascending energy. The HOMO orbital is assigned to 0 eV. The displayed orbitals are the five orbitals with the highest %d-orbital character.

**Table S10** | The energies of the spin-up and spin down molecular orbitals in **3** derived from the atomic d orbitals, as well as the percent-d orbital character of the molecular orbital. The HOMO orbital of the system (the highest energy orbital with an occupancy of 1) is arbitrarily set to 0 eV.

| d Orbital     | Spin-up Orbital<br>Energy (eV) | d Orbital<br>Character (%) | Spin-down Orbital<br>Energy (eV) | d Orbital<br>Character (%) |
|---------------|--------------------------------|----------------------------|----------------------------------|----------------------------|
| $d_{xy}$      | -4.089                         | 74.3                       | -3.894                           | 54.8                       |
| $d_z^2$       | -3.344                         | 63.1                       | -2.956                           | 63.5                       |
| $d_{yz}$      | -3.164                         | 66.1                       | -2.685                           | 69.4                       |
| $d_{sz}$      | -2.816                         | 29.8                       | -2.566                           | 28.3                       |
| $d_{x^2-y^2}$ | 0                              | 27.3                       | 4.416                            | 30.8                       |

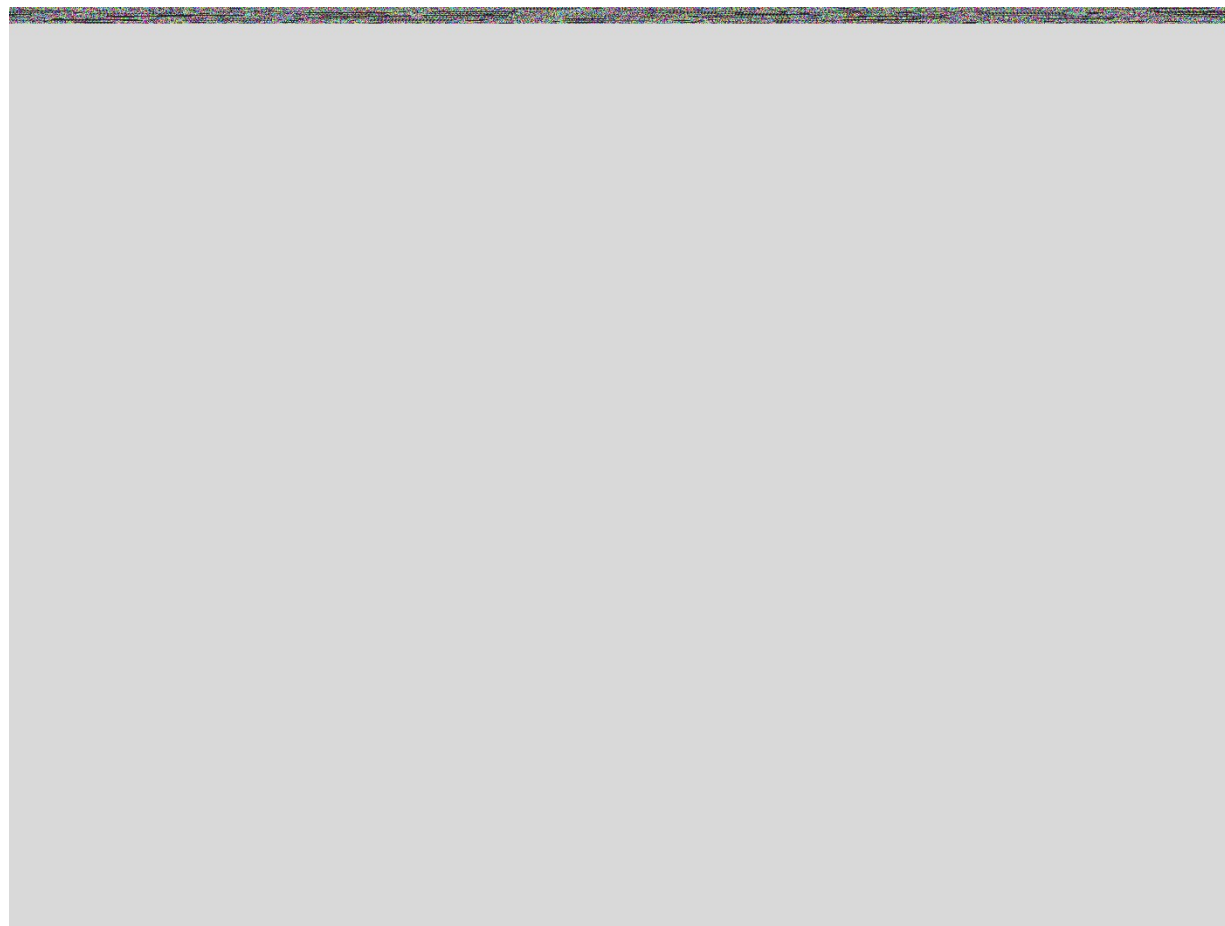

**Figure S4** | Energy of the spin-up and spin-down molecular orbitals derived from the copper d-orbitals in **3** (in eV) and the percent character of the molecular orbital comprised of the atomic d-orbital. Numbers index molecular orbitals in ascending energy. The HOMO orbital is assigned to 0 eV. The displayed orbitals are the five orbitals with the highest %d-orbital character.

**Table S11** | The combined cw-EPR fit parameters for **1'**–**3'** at 5 K, and **1**–**3** in OTP (0.1 weight percent, 60 K, **1'''**–**3'''**). The errors given are approximate errors from simulating the spectra.

|                            | <b>1'</b>        | <b>1'''</b>      | <b>2'</b> | <b>2'''</b> | <b>3'</b>                 | <b>3'''</b> |
|----------------------------|------------------|------------------|-----------|-------------|---------------------------|-------------|
| $g_{\perp}$                | 2.055(5)         | 2.05(5)          | 2.036(4)  | 2.045(5)    | 2.06(2)                   | 2.025(5)    |
| $g_{\parallel}$            | 2.205(5)         | 2.200(5)         | 2.169(1)  | 2.18(1)     | 2.17(1)                   | 2.18(1)     |
| $A_{\text{Cu}, \perp}$     | 40(5)            | 40(10)           | 63(8)     | 100(10)     | 50(20)                    | 65(5)       |
| $A_{\text{Cu}, \parallel}$ | 440(20)          | 460(10)          | 650(20)   | 650(20)     | 630(20)                   | 620(15)     |
| $A_{\text{N}, \perp}$      | 10(5)            | 15(5)            | 50(3)     | 40(5)       | 50(15)                    | 58(3)       |
| $A_{\text{N}, \parallel}$  | 20(5)            | 20(5)            | 45(3)     | 45(5)       | 45(10)                    | 45(3)       |
| Lorentzian Broadening      | ----             | ----             | 0.96      | 1.1         | ----                      | 1.68        |
| H-Strain                   | [140 140<br>190] | [110 110<br>140] | ----      | ----        | ----                      | ----        |
| g-Strain                   | ----             | ----             | ----      | ----        | [0.012<br>0.012<br>0.016] | ----        |

**Table S12** | Computed  $A$  and  $g$  tensors for all three molecules.  $A$  tensor is in MHz.

|                   | <b>1</b> | <b>2</b> | <b>3</b> |
|-------------------|----------|----------|----------|
| $g_x$             | 2.0504   | 2.0390   | 2.0310   |
| $g_y$             | 2.0509   | 2.0411   | 2.0349   |
| $g_z$             | 2.1508   | 2.1355   | 2.1390   |
| $A_{\text{N},x}$  | 28.7     | 40.0     | 34.1     |
| $A_{\text{N},y}$  | 29.8     | 41.5     | 34.8     |
| $A_{\text{N},z}$  | 41.2     | 54.6     | 47.4     |
| $A_{\text{Cu},x}$ | 35.7     | −61.4    | −51.5    |
| $A_{\text{Cu},y}$ | 11.9     | −64.9    | −53.2    |
| $A_{\text{Cu},z}$ | −518.48  | −655.37  | −622     |

**Table S13** | The spin density of the unpaired electron spin on the copper and the directly bound donor atom (O or N). As the antibonding character of the orbital the electron is in increases, the spin becomes increasing localized on the ligand, represented by a decrease in  $\rho_{\text{Cu}}$  and an increase in  $\rho_{\text{E,Avg}}$ . The decreased spin density on the ligand in **2** is a result of weaker resonance in the ligand. In viewing the ligands of **1**–**3**, the acacen ligand in **2** has weaker resonance contributions from structures which place increased spin density on carbon, causing a comparatively greater  $\rho_{\text{E,Avg}}$  than would otherwise be expected.

|                       | <b>1</b> | <b>2</b> | <b>3</b> |
|-----------------------|----------|----------|----------|
| $\rho_{\text{Cu}}$    | 0.599    | 0.591    | 0.541    |
| $\rho_{\text{E,Avg}}$ | 0.088    | 0.096    | 0.092    |

**Table S14** | Saturation recovery fit parameters for **1'**

| Temperature (K) | $T_1$ ( $\mu$ s) | $\sigma$  | A        | $I_0$     |
|-----------------|------------------|-----------|----------|-----------|
| 5               | 5210(360)        | 0.340(10) | 1.16(3)  | 0.10(2)   |
| 10              | 1420(14)         | 0.713(6)  | 0.987(5) | 0.0126(5) |
| 20              | 147.00(7)        | 0.912(4)  | 0.980(3) | 0.0112(3) |
| 30              | 41.77(2)         | 0.957(5)  | 0.981(3) | 0.0018(7) |
| 40              | 16.90(9)         | 0.959(5)  | 0.966(4) | 0.0124(3) |
| 50              | 7.21(6)          | 0.940(8)  | 0.972(6) | 0.0112(4) |
| 60              | 2.98(2)          | 0.97(1)   | 0.984(7) | −0.010(2) |
| 70              | 1.35(5)          | 1.00(3)   | 0.98(3)  | 0.018(2)  |
| 80              | 0.83(12)         | 1.0(1)    | 0.87(12) | 0.945(4)  |
| 90              | 0.47(50)         | 1.0(7)    | 0.845(8) | 0.155(7)  |

**Table S15** | Saturation recovery fit parameters for **1''**

| Temperature (K) | $T_1$ ( $\mu$ s) | $\sigma$ | A        | $I_0$     |
|-----------------|------------------|----------|----------|-----------|
| 5               | 3870(100)        | 0.470(7) | 0.989(5) | 0.008(3)  |
| 10              | 373(14)          | 0.66(2)  | 0.936(8) | 0.024(5)  |
| 20              | 48(2)            | 0.81(4)  | 0.95(1)  | 0.041(5)  |
| 30              | 17.3(8)          | 0.79(5)  | 0.96(1)  | 0.025(6)  |
| 40              | 10.0(8)          | 0.77(8)  | 0.94(3)  | 0.06(1)   |
| 50              | 5.25(8)          | 0.911(7) | 1.090(8) | 0.0101(4) |
| 60              | 2.44(3)          | 0.96(1)  | 0.935(9) | 0.0122(4) |
| 70              | 1.54(4)          | 0.99(2)  | 1.25(2)  | 0.0178(8) |
| 80              | 0.80(3)          | 0.83(3)  | 1.90(3)  | −0.08(1)  |
| 90              | 0.68(3)          | 0.94(9)  | 2.2(2)   | −0.21(4)  |

**Table S16** | Saturation recovery fit parameters for **2'**

| Temperature (K) | $T_1$ ( $\mu$ s) | $\sigma$ | A        | $I_0$     |
|-----------------|------------------|----------|----------|-----------|
| 5               | 14000(300)       | 0.548(6) | 1.006(5) | 0.002(3)  |
| 10              | 1830(10)         | 0.783(6) | 0.994(2) | 0.000(2)  |
| 20              | 172(1)           | 0.864(6) | 0.996(2) | 0.002(2)  |
| 30              | 53.2(4)          | 0.910(8) | 0.997(2) | 0.006(1)  |
| 40              | 22.3(2)          | 0.906(1) | 0.997(2) | 0.009(1)  |
| 50              | 12.0(1)          | 0.936(1) | 0.999(3) | 0.12(1)   |
| 60              | 7.20(7)          | 0.924(1) | 1.016(4) | 0.009(2)  |
| 70              | 4.54(5)          | 0.97(1)  | 1.014(5) | 0.010(1)  |
| 80              | 3.43(1)          | 0.979(6) | 1.025(2) | 0.0021(8) |
| 90              | 2.43(1)          | 0.985(8) | 1.033(3) | 0.0046(9) |
| 100             | 1.92(1)          | 0.98(1)  | 1.050(5) | 0.005(1)  |
| 120             | 1.09(1)          | 0.97(2)  | 1.090(9) | 0.009(2)  |
| 140             | 0.76(1)          | 1.00(1)  | 1.12(1)  | 0.009(1)  |
| 160             | 0.57(2)          | 1.00(4)  | 1.17(2)  | 0.013(2)  |
| 180             | 0.39(3)          | 0.97(8)  | 1.23(6)  | 0.049(4)  |
| 200             | 0.27(7)          | 0.9(2)   | 1.38(3)  | 0.06(1)   |
| 220             | 0.25(1)          | 1.2(3)   | 1.3(3)   | 0.09(1)   |
| 240             | 0.23(8)          | 1.4(7)   | 1.1(4)   | 0.14(2)   |
| 260             | 0.27(3)          | 2.0(8)   | 1.0(2)   | 0.13(2)   |

**Table S17** | Saturation recovery fit parameters for **2''**

| Temperature (K) | $T_1$ ( $\mu$ s) | $\sigma$ | A        | $I_0$     |
|-----------------|------------------|----------|----------|-----------|
| 5               | 7060(80)         | 0.825(9) | 0.993(3) | 0.005(2)  |
| 10              | 960(10)          | 0.86(1)  | 0.992(4) | 0.00(2)   |
| 20              | 126(1)           | 0.930(9) | 0.993(3) | −0.001(1) |
| 30              | 42.9(3)          | 0.932(8) | 0.997(2) | −0.024(1) |
| 40              | 18.5(1)          | 0.94(1)  | 0.994(6) | −0.006(5) |
| 50              | 10.6(2)          | 0.93(1)  | 1.004(7) | 0.017(3)  |
| 60              | 6.7(2)           | 0.93(4)  | 1.00(1)  | 0.02(1)   |
| 70              | 4.2(1)           | 0.90(4)  | 1.02(2)  | 0.021(6)  |
| 80              | 3.2(1)           | 1.05(6)  | 0.99(2)  | 0.025(7)  |
| 90              | 2.10(8)          | 0.98(6)  | 1.01(2)  | 0.044(6)  |
| 100             | 1.43(1)          | 0.97(3)  | 1.071(8) | 0.010(2)  |
| 120             | 1.00(4)          | 0.99(5)  | 1.08(3)  | 0.029(3)  |
| 140             | 0.90(2)          | 1.03(3)  | 1.1(1)   | 0.010(2)  |
| 160             | 0.570(5)         | 0.99(1)  | 1.191(8) | 0.0053(7) |
| 180             | 0.40(2)          | 1.02(2)  | 1.25(5)  | 0.022(3)  |
| 200             | 0.38(1)          | 1.4(1)   | 1.13(4)  | 0.033(4)  |
| 220             | 0.28(2)          | 1.1(1)   | 1.3(1)   | 0.028(5)  |
| 240             | 0.23(6)          | 1.6(8)   | 1.2(4)   | 0.13(2)   |
| 260             | 0.2(1)           | 0.7(4)   | 2(1)     | 0.11(2)   |

**Table S18** | Saturation recovery fit parameters for **3'**

| Temperature (K) | $T_1$ ( $\mu$ s) | $\sigma$  | A        | $I_0$     |
|-----------------|------------------|-----------|----------|-----------|
| 5               | 10700(260)       | 0.635(11) | 0.994(5) | 0.007(3)  |
| 10              | 4060(30)         | 0.727(5)  | 1.000(1) | 0.003(1)  |
| 20              | 764(4)           | 0.870(5)  | 0.993(1) | 0.0051(8) |
| 30              | 280(1)           | 0.928(6)  | 0.991(1) | 0.0062(8) |
| 40              | 136.3(5)         | 0.946(4)  | 0.994(1) | 0.0045(4) |
| 50              | 72.4(4)          | 0.946(6)  | 0.996(2) | 0.0080(9) |
| 60              | 37.1(2)          | 0.958(7)  | 0.990(2) | 0.0114(9) |
| 70              | 23.8(3)          | 0.922(14) | 0.997(4) | 0.078(1)  |
| 80              | 13.9(2)          | 0.91(2)   | 0.981(2) | 0.020(2)  |
| 90              | 8.71(2)          | 0.96(3)   | 0.99(1)  | 0.026(2)  |
| 100             | 5.2(4)           | 0.83(8)   | 0.99(4)  | 0.056(1)  |
| 120             | 4.2(7)           | 0.86(6)   | 0.98(3)  | 0.045(7)  |
| 140             | 2.0(1)           | 0.88(1)   | 1.05(6)  | 0.042(9)  |
| 160             | 1.50(7)          | 1.00(3)   | 1.02(3)  | 0.042(5)  |
| 180             | 0.93(4)          | 1.01(6)   | 1.08(3)  | 0.035(3)  |
| 200             | 0.66(5)          | 1.2(1)    | 1.05(4)  | 0.035(4)  |
| 220             | 0.47(6)          | 1.1(2)    | 1.11(1)  | 0.089(9)  |
| 240             | 0.37(4)          | 1.0(1)    | 1.2(1)   | 0.051(6)  |
| 260             | 0.30(6)          | 1.1(3)    | 1.2(2)   | 0.09(1)   |
| 280             | 0.25(4)          | 1.3(3)    | 1.3(3)   | 0.07(1)   |
| 300             | 0.22(5)          | 1.4(5)    | 1.3(4)   | 0.09(2)   |

**Table S19** | Saturation recovery fit parameters for **3''**

| Temperature (K) | $T_1$ ( $\mu$ s) | $\sigma$ | A        | $I_0$     |
|-----------------|------------------|----------|----------|-----------|
| 5               | 1320(10)         | 0.602(3) | 1.005(8) | 0.004(1)  |
| 10              | 537(6)           | 0.656(6) | 0.990(2) | 0.012(1)  |
| 20              | 162(1)           | 0.734(5) | 0.993(1) | 0.0082(4) |
| 30              | 76.6(8)          | 0.747(7) | 0.996(3) | 0.005(1)  |
| 40              | 39.2(5)          | 0.75(1)  | 0.995(4) | 0.010(1)  |
| 50              | 25.1(3)          | 0.80(1)  | 1.002(4) | 0.006(1)  |
| 60              | 16.7(2)          | 0.85(1)  | 1.000(5) | 0.012(2)  |
| 70              | 11.0(3)          | 0.88(3)  | 0.996(9) | 0.009(4)  |
| 80              | 6.5(1)           | 0.84(2)  | 1.017(9) | 0.016(3)  |
| 90              | 4.2(1)           | 0.86(4)  | 1.02(2)  | 0.029(5)  |
| 100             | 2.90(6)          | 0.84(4)  | 1.05(1)  | 0.019(2)  |
| 120             | 1.85(5)          | 0.90(4)  | 1.05(2)  | 0.020(3)  |
| 140             | 1.17(5)          | 0.96(5)  | 1.07(3)  | 0.027(4)  |
| 160             | 0.76(4)          | 0.92(6)  | 1.13(4)  | 0.019(5)  |
| 180             | 0.54(8)          | 0.92(7)  | 1.19(6)  | 0.037(0)  |
| 200             | 0.43(3)          | 1.0(1)   | 1.22(8)  | 0.025(5)  |
| 220             | 0.36(3)          | 1.3(2)   | 1.2(1)   | 0.058(8)  |
| 240             | 0.3(1)           | 1.0(3)   | 1.2(3)   | 0.10(1)   |
| 260             | 0.2(2)           | 0.7(4)   | 1.9(1)   | 0.11(2)   |
| 280             | 0.30(7)          | 1.8(1)   | 0.9(3)   | 0.22(2)   |

**Table S20** | Fit parameters for 2 pulse Hahn echo decay measurements for **1'**

| Temperature (K) | $T_m$ ( $\mu$ s) | A       | $I_0$     |
|-----------------|------------------|---------|-----------|
| 5               | 0.32(2)          | 1.0(1)  | 0.008(3)  |
| 10              | 0.37(6)          | 1.0(2)  | 0.067(6)  |
| 20              | 0.64(4)          | 1.0(1)  | 0.005(4)  |
| 30              | 0.391(8)         | 0.91(9) | 0.11(3)   |
| 40              | 0.599(6)         | 1.0(2)  | 0.001(4)  |
| 50              | 0.47(7)          | 1.0(3)  | 0.000(2)  |
| 60              | 0.56(2)          | 1.00(4) | -0.015(4) |
| 70              | 0.47(2)          | 1.00(5) | -0.010(3) |
| 80              | 0.32(3)          | 1.0(2)  | -0.004(2) |
| 90              | 0.32(2)          | 1.0(1)  | 0.008(3)  |

**Table S21** | Fit parameters for 2 pulse Hahn echo decay measurements for **1''**

| Temperature (K) | $T_m$ ( $\mu$ s) | A        | $I_0$     |
|-----------------|------------------|----------|-----------|
| 5               | 14.1(2)          | 0.81(1)  | 0.11(1)   |
| 10              | 14.3(6)          | 0.78(1)  | 0.11(1)   |
| 20              | 11.1(2)          | 0.789(9) | 0.068(1)  |
| 30              | 5.3(2)           | 0.77(1)  | -0.004(4) |
| 40              | 2.7(1)           | 0.64(1)  | -0.011(3) |
| 50              | 0.49(2)          | 0.63(3)  | -0.012(4) |
| 60              | 0.32(3)          | 0.54(3)  | -0.003(3) |
| 70              | 0.36(4)          | 0.61(3)  | -0.005(5) |
| 80              | 0.33(1)          | 0.58(1)  | -0.004(2) |
| 90              | 0.33(1)          | 0.59(1)  | -0.012(5) |

**Table S22** | Fit parameters for 2 pulse Hahn echo decay measurements for **2'**

| Temperature (K) | $T_m$ ( $\mu$ s) | A       | $I_0$     |
|-----------------|------------------|---------|-----------|
| 5               | 2.82(6)          | 1.00(9) | 0.014(5)  |
| 10              | 2.88(6)          | 1.00(9) | 0.011(4)  |
| 20              | 2.55(5)          | 1.00(1) | 0.014(4)  |
| 30              | 1.99(9)          | 1.00(2) | 0.04(1)   |
| 40              | 1.37(3)          | 1.00(1) | 0.024(5)  |
| 50              | 1.12(2)          | 1.00(1) | 0.017(3)  |
| 60              | 0.452(6)         | 1.00(9) | -0.004(1) |
| 70              | 0.37(3)          | 1.00(7) | 0.002(3)  |
| 80              | 0.452(6)         | 1.00(1) | 0.001(2)  |
| 90              | 0.485(7)         | 1.00(1) | 0.002(2)  |
| 100             | 0.466(7)         | 1.00(1) | 0.002(2)  |
| 120             | 0.409(6)         | 1.00(1) | 0.001(2)  |
| 140             | 0.43(3)          | 1.00(6) | 0.003(3)  |
| 160             | 0.292(6)         | 1.00(1) | -0.000(1) |
| 180             | 0.257(9)         | 1.00(2) | 0.001(4)  |
| 200             | 0.21(1)          | 1.00(3) | 0.006(5)  |
| 220             | 0.16(1)          | 0.96(5) | 0.002(6)  |
| 240             | 0.19(2)          | 0.99(6) | 0.006(9)  |

**Table S23** | Fit parameters for 2 pulse Hahn echo decay measurements for **2''**

| Temperature<br>(K) | $T_m$ ( $\mu$ s) | A        | $I_0$       |
|--------------------|------------------|----------|-------------|
| 5                  | 6.20(4)          | 1.000(3) | −0.057(1)   |
| 10                 | 5.88(4)          | 1.000(4) | −0.095(1)   |
| 20                 | 7.2(1)           | 1.005(6) | −0.058(4)   |
| 30                 | 3.06(3)          | 0.897(5) | 0.023(2)    |
| 40                 | 2.21(2)          | 0.903(5) | 0.023(1)    |
| 50                 | 1.68(2)          | 0.895(7) | 0.032(1)    |
| 60                 | 1.30(2)          | 0.900(7) | 0.022(3)    |
| 70                 | 1.14(2)          | 0.936(7) | 0.012(3)    |
| 80                 | 1.07(2)          | 0.912(8) | 0.038(3)    |
| 90                 | 1.0(2)           | 1.00(1)  | −0.116(3)   |
| 100                | 1.0679 (3)       | 1.000(1) | −0.00254(6) |
| 120                | 0.66(1)          | 0.954(9) | 0.054(1)    |
| 140                | 0.546(8)         | 1.000(9) | 0.044(2)    |
| 160                | 0.491(6)         | 1.000(8) | −0.044(1)   |
| 180                | 0.43(1)          | 1.00(1)  | 0.000(3)    |
| 200                | 0.41(1)          | 1.00(1)  | 0.002(2)    |
| 220                | 0.33(1)          | 0.999(1) | 0.00206(1)  |
| 240                | 0.316(8)         | 1.00(1)  | 0.006(3)    |
| 260                | 0.275(8)         | 1.00(2)  | −0.001(3)   |

**Table S24** | Fit parameters for 2 pulse Hahn echo decay measurements for **3'**

| Temperature<br>(K) | $T_m$ ( $\mu$ s) | A        | $I_0$      |
|--------------------|------------------|----------|------------|
| 5                  | 1.49(8)          | 0.887(7) | −0.0019(9) |
| 10                 | 1.84(2)          | 0.874(7) | −0.001(1)  |
| 20                 | 2.03(2)          | 0.873(7) | 0.000(1)   |
| 30                 | 2.05(2)          | 0.871(7) | 0.000(1)   |
| 40                 | 2.01(2)          | 0.869(6) | 0.000(1)   |
| 50                 | 1.98(2)          | 0.873(7) | 0.002(1)   |
| 60                 | 1.77(2)          | 0.897(7) | 0.000 (1)  |
| 70                 | 0.80(1)          | 1.00(3)  | −0.001(3)  |
| 80                 | 0.79(1)          | 0.945(9) | 0.0000(1)  |
| 90                 | 0.574(9)         | 1.000(9) | −0.0002(8) |
| 100                | 0.38(3)          | 1.00(7)  | −0.002(3)  |
| 120                | 0.355(8)         | 1.00(1)  | 0.004(3)   |
| 140                | 0.50(1)          | 1.00(1)  | 0.001(3)   |
| 160                | 0.79(2)          | 1.00(1)  | −0.009(5)  |
| 180                | 0.79(2)          | 1.00 (1) | −0.012(5)  |
| 200                | 0.67(2)          | 1.00(1)  | 0.009(4)   |
| 220                | 0.60(1)          | 1.00(1)  | −0.006(4)  |
| 240                | 0.53(1)          | 1.00(1)  | −0.005(4)  |
| 260                | 0.47(1)          | 1.00(2)  | −0.003(3)  |
| 280                | 0.43(1)          | 1.00(2)  | 0.001(3)   |
| 300                | 0.43(1)          | 1.00(2)  | −0.005(4)  |

**Table S25** | Fit parameters for 2 pulse Hahn echo decay measurements for **3''**

| Temperature<br>(K) | $T_m$ ( $\mu$ s) | A        | $I_0$     |
|--------------------|------------------|----------|-----------|
| 5                  | 3.98(4)          | 0.837(5) | 0.0046(1) |
| 10                 | 3.58(3)          | 0.859(5) | 0.004(1)  |
| 20                 | 3.26(3)          | 0.872(5) | 0.001(1)  |
| 30                 | 1.97(2)          | 0.882(6) | 0.005(1)  |
| 40                 | 1.40(2)          | 0.913(7) | 0.0054(9) |
| 50                 | 1.75(2)          | 0.929(5) | 0.006(1)  |
| 60                 | 2.12(2)          | 0.907(5) | 0.006(2)  |
| 70                 | 2.12(2)          | 0.912(6) | 0.007(1)  |
| 80                 | 1.82(2)          | 0.920(6) | 0.004(1)  |
| 90                 | 1.82(2)          | 0.920(6) | 0.004(1)  |
| 100                | 0.70(1)          | 1.000(9) | 0.003(1)  |
| 120                | 0.552(9)         | 1.000(9) | 0.019(2)  |
| 140                | 0.543(9)         | 1.000(1) | 0.019(3)  |
| 160                | 0.75(2)          | 1.00(1)  | 0.006(4)  |
| 180                | 0.75(2)          | 1.00(1)  | 0.004(4)  |
| 200                | 0.67(2)          | 1.00(1)  | 0.001(4)  |
| 220                | 0.59(1)          | 1.00(1)  | 0.005(4)  |
| 240                | 0.50(1)          | 1.00(1)  | 0.002(4)  |
| 260                | 0.47(1)          | 1.00(1)  | 0.001(4)  |
| 280                | 0.44(3)          | 1.00(1)  | -0.005(4) |

**Table 26** | Fit parameters extracted from fits to **1'-3'** and **1''-3''**. When fitting **1''-3''**, the Debye temperature was held to a constant, arbitrary value to reflect that all measurements were performed in the same matrix (OTP). This is signified by boldface text.

|                                      | 1'      | 1''       | 2'      | 2''       | 3'      | 3''       |
|--------------------------------------|---------|-----------|---------|-----------|---------|-----------|
| $A_{Dir}$ ( $s^{-1} K^{-1}$ )        | 39(4)   | 65(25)    | 13.8(4) | 32(6)     | 18(1)   | 160(20)   |
| $B_{Ram}$ ( $s^{-1}$ ) $\times 10^5$ | 15(5)   | 7.3(3)    | 2(1)    | 10.8(5)   | 2.7(2)  | 3.7(1)    |
| $\Theta_D$ (K)                       | 75(10)  | <b>65</b> | 63(8)   | <b>65</b> | 81(4)   | <b>65</b> |
| $C_{Loc}$ ( $s^{-1}$ ) $\times 10^7$ | 18.5(9) | 56(4)     | 0.6(1)  | 0.32(5)   | 1.1(1)  | 0.8(1)    |
| $\Delta_{Loc}$ ( $s^{-1}$ )          | 290(40) | 250(30)   | 213(25) | 192(15)   | 328(15) | 273(18)   |

**Table 27** | Room temperature Rabi rate for **3'** at variable microwave power

|                 | 1 dB | 3 dB | 7.2 dB |
|-----------------|------|------|--------|
| Rabi Rate (MHz) | 27.3 | 19.5 | 11.7   |

**Table S28** | Linear fit for g-tensor for **1** with eq. 1 ( $g_{ii} = (b(g_{ii}) * x) + g_{eq}$ ) for each component of the g-tensor (x, y, and z). The  $r^2$  value is the coefficient of determination for each linear regression.

| Mode | Frequency | $b(g_{xx})$ | $r^2(g_{xx})$ | $b(g_{yy})$ | $r^2(g_{yy})$ | $b(g_{zz})$ | $r^2(g_{zz})$ |
|------|-----------|-------------|---------------|-------------|---------------|-------------|---------------|
| 3    | 7.40      | 0.0000      | 0.784         | 0.0000      | 0.988         | 0.0001      | 0.971         |
| 4    | 14.77     | 0.0000      | 0.814         | 0.0000      | 0.352         | -0.0000     | 0.013         |
| 5    | 20.09     | 0.0000      | 0.485         | -0.0000     | 0.906         | -0.0001     | 0.681         |
| 6    | 38.38     | -0.0005     | 0.688         | 0.0005      | 0.670         | 0.0001      | 0.507         |
| 7    | 40.67     | 0.0007      | 0.999         | 0.0000      | 0.935         | 0.0002      | 0.934         |
| 8    | 56.96     | -0.0014     | 0.999         | -0.0006     | 0.999         | -0.0030     | 0.999         |
| 9    | 74.64     | -0.0001     | 0.000         | 0.0001      | 0.000         | -0.0000     | 0.350         |
| 10   | 90.59     | -0.0002     | 0.939         | 0.0002      | 0.952         | -0.0001     | 0.835         |
| 11   | 112.12    | 0.0026      | 0.999         | 0.0003      | 0.998         | -0.0045     | 0.999         |
| 12   | 115.41    | -0.0011     | 0.999         | -0.0000     | 0.995         | 0.0025      | 0.999         |
| 13   | 132.06    | -0.0001     | 0.996         | -0.0002     | 0.998         | -0.0006     | 0.999         |
| 14   | 133.15    | -0.0002     | 0.999         | 0.0003      | 0.999         | 0.0020      | 1.000         |
| 15   | 143.79    | 0.0002      | 0.997         | 0.0000      | 0.988         | 0.0004      | 0.997         |
| 16   | 145.55    | 0.0004      | 0.984         | -0.0000     | 0.717         | 0.0004      | 0.994         |
| 17   | 149.51    | 0.0102      | 0.999         | 0.0056      | 0.999         | 0.0189      | 1.000         |
| 18   | 158.63    | -0.0001     | 0.985         | 0.0002      | 0.609         | 0.0000      | 0.000         |
| 19   | 161.12    | -0.0026     | 0.040         | 0.0026      | 0.040         | -0.0000     | 0.709         |
| 20   | 188.66    | 0.0019      | 0.999         | 0.0008      | 0.999         | -0.0019     | 0.999         |
| 21   | 189.18    | 0.0000      | 0.150         | -0.0001     | 0.990         | 0.0001      | 0.871         |
| 22   | 211.25    | -0.0066     | 0.055         | 0.0066      | 0.053         | -0.0002     | 0.032         |
| 23   | 219.52    | -0.0002     | 0.999         | -0.0002     | 0.999         | -0.0003     | 0.998         |
| 24   | 225.45    | -0.0011     | 0.354         | 0.0009      | 0.275         | -0.0002     | 0.987         |
| 25   | 227.33    | 0.0001      | 0.509         | -0.0000     | 0.478         | 0.0001      | 0.147         |
| 26   | 230.58    | -0.0077     | 0.999         | -0.0081     | 0.999         | -0.0123     | 1.000         |
| 27   | 252.21    | 0.0000      | 0.335         | -0.0000     | 0.016         | 0.0002      | 0.023         |
| 28   | 259.60    | -0.0000     | 0.013         | 0.0000      | 0.089         | 0.0000      | 0.028         |
| 29   | 275.50    | -0.0027     | 0.998         | 0.0006      | 0.992         | 0.0061      | 0.999         |
| 30   | 292.34    | 0.0001      | 0.197         | 0.0001      | 0.154         | 0.0001      | 0.068         |
| 31   | 305.93    | -0.0000     | 0.034         | 0.0001      | 0.206         | 0.0001      | 0.030         |
| 32   | 312.69    | -0.0035     | 0.073         | 0.0035      | 0.073         | 0.0000      | 0.013         |
| 33   | 336.33    | -0.0005     | 0.756         | 0.0005      | 0.594         | -0.0000     | 0.009         |
| 34   | 339.75    | 0.0000      | 0.298         | 0.0001      | 0.999         | 0.0001      | 0.939         |
| 35   | 341.37    | -0.0014     | 0.999         | -0.0011     | 0.999         | -0.0019     | 0.985         |
| 36   | 341.89    | 0.0021      | 0.999         | 0.0016      | 0.999         | 0.0028      | 0.999         |
| 37   | 387.97    | 0.0001      | 0.003         | -0.0002     | 0.004         | -0.0001     | 0.391         |
| 38   | 391.96    | 0.0002      | 0.867         | 0.0002      | 0.934         | 0.0005      | 0.744         |
| 39   | 420.35    | 0.0126      | 0.999         | 0.0136      | 1.000         | 0.0372      | 0.999         |
| 40   | 426.94    | -0.0000     | 0.006         | -0.0001     | 0.018         | -0.0001     | 0.009         |

**Table S29** | Linear fit for g-tensor for **2** with eq. 1 ( $g_{ii} = (b(g_{ii}) * x) + g_{eq}$ ) for each component of the g-tensor (x, y, and z). The  $r^2$  value is the coefficient of determination for each linear regression.

| Mode | Frequency | $b(g_{xx})$ | $r^2(g_{xx})$ | $b(g_{yy})$ | $r^2(g_{yy})$ | $b(g_{zz})$ | $r^2(g_{zz})$ |
|------|-----------|-------------|---------------|-------------|---------------|-------------|---------------|
| 7    | 34.8      | 0.0000      | 0.946         | -0.0002     | -0.998        | -0.0017     | -0.999        |
| 8    | 35.3      | 0.0000      | -0.970        | 0.0000      | 0.968         | 0.0003      | 0.998         |
| 9    | 85.3      | 0.0000      | 0.971         | 0.0000      | 0.052         | 0.0000      | 0.937         |
| 10   | 96.3      | 0.0000      | 0.999         | 0.0000      | -1.000        | -0.0003     | -0.999        |
| 11   | 99.9      | -0.0014     | -1.000        | -0.0008     | -0.999        | -0.0022     | -0.997        |
| 12   | 105.2     | -0.0000     | -0.970        | -0.0000     | -0.9711       | -0.0000     | -0.995        |
| 13   | 129.3     | 0.0011      | 0.999         | 0.0018      | 0.999         | 0.0076      | 0.999         |
| 14   | 132.7     | -0.0000     | -0.953        | -0.0000     | -0.825        | -0.0001     | -0.956        |
| 15   | 139.3     | -0.0030     | -1.000        | -0.0032     | -0.999        | -0.0131     | -0.999        |
| 16   | 155.2     | -0.0005     | -1.000        | -0.0005     | -1.000        | -0.0014     | -1.000        |
| 17   | 179.2     | 0.0000      | 0.410         | 0.0000      | -0.135        | 0.0000      | 0.475         |
| 18   | 191.3     | -0.0010     | -1.000        | -0.0010     | -1.000        | -0.0039     | -1.000        |
| 19   | 197.1     | 0.0000      | 0.204         | -0.0000     | -0.247        | -0.0000     | -0.327        |
| 20   | 211.2     | 0.0002      | 0.291         | -0.0002     | -0.290        | 0.0000      | 0.268         |
| 21   | 241.5     | 0.0014      | 0.999         | 0.0002      | 0.999         | 0.0067      | 0.999         |
| 22   | 260       | 0.0033      | 1.000         | 0.0041      | 1.000         | 0.0107      | 1.000         |
| 23   | 265       | 0.0000      | 0.108         | -0.0001     | -0.307        | -0.0001     | -0.357        |
| 24   | 272.1     | 0.0000      | 0.202         | -0.0001     | -0.277        | -0.0001     | -0.497        |
| 25   | 293.6     | 0.0000      | -0.886        | -0.0000     | -0.425        | -0.0000     | -0.337        |
| 26   | 298.1     | -0.0014     | -0.999        | -0.0011     | -0.999        | -0.0037     | -0.999        |
| 27   | 331.9     | 0.0052      | 0.999         | 0.0058      | 0.999         | 0.0233      | 0.999         |
| 28   | 384       | 0.0000      | 0.729         | -0.0000     | -0.365        | -0.0000     | -0.298        |
| 29   | 399.1     | 0.0077      | 1.000         | 0.0084      | 1.000         | 0.0294      | 0.999         |
| 30   | 439.9     | 0.0001      | 0.354         | 0.0001      | 0.462         | 0.0003      | 0.376         |
| 31   | 447.2     | -0.0076     | -1.000        | -0.0091     | -0.999        | -0.0253     | -0.999        |

**Table S30** | Linear fit for g-tensor for **3** with eq. 1 ( $g_{ii} = (b(g_{ii}) * x) + g_{eq}$ ) for each component of the g-tensor (x, y, and z). The  $r^2$  value is the coefficient of determination for each linear regression.

| Mode | Frequency | $b(g_{xx})$ | $r^2(g_{xx})$ | $b(g_{yy})$ | $r^2(g_{yy})$ | $b(g_{zz})$ | $r^2(g_{zz})$ |
|------|-----------|-------------|---------------|-------------|---------------|-------------|---------------|
| 7    | 49.4      | -0.0009     | 0.999         | -0.0009     | 0.999         | -0.0006     | 0.999         |
| 8    | 49.8      | 0.0000      | 0.760         | 0.0000      | 0.265         | 0.0000      | 0.097         |
| 9    | 69.4      | 0.0012      | 0.999         | 0.0004      | 0.999         | -0.0036     | 0.999         |
| 10   | 78.8      | 0.0000      | 0.060         | 0.0000      | 0.000         | 0.0000      | 0.061         |
| 11   | 93.5      | 0.0000      | 0.080         | 0.0000      | 0.533         | 0.0000      | 0.071         |
| 12   | 101.9     | 0.0000      | 0.000         | 0.0000      | 0.003         | 0.0000      | 0.007         |
| 13   | 123.6     | 0.0000      | 0.043         | 0.0000      | 0.036         | 0.0000      | 0.031         |
| 14   | 150.6     | 0.0000      | 0.054         | 0.0000      | 0.055         | 0.0000      | 0.055         |
| 15   | 180.4     | 0.0000      | 0.064         | 0.0000      | 0.034         | 0.0000      | 0.026         |
| 16   | 185.6     | -0.0004     | 0.998         | 0.0004      | 0.999         | 0.0042      | 0.999         |
| 17   | 190.7     | 0.0000      | 0.633         | 0.0000      | 0.057         | -0.0002     | 0.044         |
| 18   | 199.3     | 0.0036      | 0.993         | 0.0044      | 0.997         | 0.0035      | 0.953         |
| 19   | 225.1     | -0.0028     | 0.999         | -0.0024     | 0.999         | -0.0083     | 0.999         |
| 20   | 228.3     | 0.0000      | 0.018         | 0.0000      | 0.136         | 0.0000      | 0.051         |
| 21   | 230       | 0.0000      | 0.991         | 0.0000      | 0.958         | 0.0000      | 0.981         |
| 22   | 231.8     | 0.0012      | 1.000         | 0.0010      | 1.000         | 0.0031      | 1.000         |
| 23   | 233.1     | 0.0000      | 0.064         | 0.0000      | 0.065         | 0.0000      | 0.304         |
| 24   | 247.9     | -0.0000     | 0.129         | 0.0000      | 0.046         | -0.0000     | 0.016         |
| 25   | 251       | 0.0000      | 0.052         | 0.0000      | 0.053         | 0.0000      | 0.039         |
| 26   | 260.8     | -0.0001     | 0.036         | 0.0001      | 0.052         | 0.0000      | 0.006         |
| 27   | 267.6     | 0.0000      | 0.039         | 0.0000      | 0.041         | 0.0000      | 0.543         |
| 28   | 309       | 0.0026      | 1.000         | -0.0029     | 1.000         | -0.0179     | 0.999         |
| 29   | 315.2     | 0.0000      | 0.072         | 0.0000      | 0.027         | 0.0000      | 0.025         |
| 30   | 316.6     | -0.0000     | 0.055         | 0.0000      | 0.000         | -0.0000     | 0.049         |
| 31   | 339.8     | 0.0000      | 0.06522       | 0.0000      | 0.076         | 0.0000      | 0.053         |
| 32   | 350.1     | -0.0000     | 0.04305       | -0.0000     | 0.047         | -0.0001     | 0.043         |
| 33   | 368.3     | 0.0040      | 0.99978       | 0.0049      | 0.999         | 0.0202      | 0.999         |
| 34   | 380.2     | -0.0000     | 0.05372       | -0.0000     | 0.051         | -0.0001     | 0.050         |
| 35   | 385       | 0.0062      | 1.00000       | -0.0062     | 1.000         | -0.0266     | 1.000         |
| 36   | 409.2     | 0.0000      | 0.11536       | 0.0000      | 0.000         | -0.0000     | 0.010         |
| 37   | 465.7     | -0.0000     | 0.05517       | -0.0000     | 0.047         | -0.0000     | 0.050         |
| 38   | 482.2     | 0.0020      | 0.99995       | 0.0016      | 0.999         | 0.0067      | 0.998         |
| 39   | 494.4     | -0.0000     | 0.05013       | 0.0000      | 0.064         | 0.0000      | 0.041         |

**Table S31** | Quadratic fit for g-tensor for **1** with eq. 2 ( $g_{ii} = (a(g_{ii}) * x^2) + g_{eq}$ ) for each component of the g-tensor (x, y, and z). The  $r^2$  value is the coefficient of determination for each quadratic regression.

| Mode | Frequency | $a(g_{xx})$ | $r^2(g_{xx})$ | $a(g_{yy})$ | $r^2(g_{yy})$ | $a(g_{zz})$ | $r^2(g_{zz})$ |
|------|-----------|-------------|---------------|-------------|---------------|-------------|---------------|
| 3    | 7.4       | 0.0003      | 0.399         | 0.0003      | 0.101         | 0.0007      | 0.141         |
| 4    | 14.77     | 0.0004      | 0.377         | 0.0003      | 0.829         | 0.0006      | 0.886         |
| 5    | 20.09     | 0.0003      | 0.717         | 0.0001      | 0.009         | 0.0004      | 0.139         |
| 6    | 38.38     | -0.0063     | 0.524         | 0.0065      | 0.542         | 0.0008      | 0.702         |
| 7    | 40.67     | 0.0004      | 0.038         | 0.0003      | 0.208         | 0.0015      | 0.210         |
| 8    | 56.96     | -0.0039     | 0.041         | -0.0017     | 0.039         | -0.0087     | 0.044         |
| 9    | 74.64     | -0.0547     | 0.964         | 0.0558      | 0.962         | 0.0006      | 0.425         |
| 10   | 90.59     | -0.0010     | 0.202         | 0.0010      | 0.179         | -0.0006     | 0.345         |
| 11   | 112.12    | 0.0080      | 0.051         | 0.0011      | 0.066         | -0.0135     | 0.048         |
| 12   | 115.41    | -0.0033     | 0.042         | -0.0002     | 0.021         | 0.0070      | 0.043         |
| 13   | 132.06    | -0.0003     | 0.023         | -0.0005     | 0.064         | -0.0018     | 0.041         |
| 14   | 133.15    | -0.0005     | 0.034         | 0.0007      | 0.034         | 0.0060      | 0.046         |
| 15   | 143.79    | 0.0009      | 0.073         | 0.0001      | 0.012         | 0.0008      | 0.026         |
| 16   | 145.55    | 0.0005      | 0.008         | 0.0005      | 0.114         | 0.0007      | 0.022         |
| 17   | 149.51    | 0.0291      | 0.043         | 0.0183      | 0.056         | 0.0560      | 0.046         |
| 18   | 158.63    | -0.0007     | 0.112         | 0.0022      | 0.606         | 0.0062      | 0.951         |
| 19   | 161.12    | -0.1748     | 0.991         | 0.1778      | 0.991         | 0.0002      | 0.116         |
| 20   | 188.66    | 0.0054      | 0.044         | 0.0021      | 0.038         | -0.0060     | 0.052         |
| 21   | 189.18    | -0.00037    | 0.66715       | 0.00057     | 0.09711       | -0.00013    | 0.018         |
| 22   | 211.25    | -0.39286    | 0.95859       | -0.39128    | 0.95863       | -0.01265    | 0.999         |
| 23   | 219.52    | -0.00034    | 0.01482       | -0.00056    | 0.03104       | -0.00076    | 0.042         |
| 24   | 225.45    | -0.02322    | 0.78371       | 0.02310     | 0.84847       | -0.00061    | 0.071         |
| 25   | 227.33    | -0.00205    | 0.33483       | -0.00158    | 0.67685       | -0.00235    | 0.720         |
| 26   | 230.58    | -0.01769    | 0.02642       | -0.01702    | 0.02206       | -0.02788    | 0.026         |
| 27   | 252.21    | 0.00092     | 0.80081       | 0.00290     | 0.92047       | 0.01934     | 0.999         |
| 28   | 259.6     | -0.00165    | 0.99807       | -0.00071    | 0.80073       | -0.00055    | 0.847         |
| 29   | 275.5     | -0.00796    | 0.04241       | 0.00063     | 0.00519       | 0.01416     | 0.027         |
| 30   | 292.34    | -0.00252    | 0.65894       | -0.00183    | 0.70960       | -0.00624    | 0.831         |
| 31   | 305.93    | -0.00227    | 0.99922       | -0.00139    | 0.65276       | 0.01017     | 0.999         |
| 32   | 312.69    | -0.17799    | 0.96274       | 0.17951     | 0.96308       | 0.00539     | 0.997         |
| 33   | 336.33    | -0.00500    | 0.38975       | 0.00659     | 0.56317       | 0.00125     | 0.931         |
| 34   | 339.75    | -0.00012    | 0.50210       | 0.00015     | 0.03316       | 0.00033     | 0.134         |
| 35   | 341.37    | -0.00272    | 0.01995       | -0.00195    | 0.01605       | -0.00098    | 0.001         |
| 36   | 341.89    | 0.00486     | 0.02715       | 0.00394     | 0.02985       | 0.00781     | 0.038         |
| 37   | 387.97    | -0.03685    | 0.92937       | 0.03857     | 0.92293       | 0.00140     | 0.391         |
| 38   | 391.96    | 0.00128     | 0.30890       | 0.00123     | 0.21000       | 0.00579     | 0.462         |
| 39   | 420.35    | 0.03586     | 0.04311       | 0.03981     | 0.04578       | 0.10709     | 0.044         |
| 40   | 426.94    | -0.00539    | 0.98097       | -0.00513    | 0.99297       | -0.01493    | 0.985         |

**Table S32** | Quadratic fit for g-tensor for **2** with eq. 2 ( $g_{ii} = (a(g_{ii}) * x^2) + g_{eq}$ ) for each component of the g-tensor (x, y, and z). The  $r^2$  value is the coefficient of determination for each quadratic regression.

| Mode | Frequency | $a(g_{xx})$ | $r^2(g_{xx})$ | $a(g_{yy})$ | $r^2(g_{yy})$ | $a(g_{zz})$ | $r^2(g_{zz})$ |
|------|-----------|-------------|---------------|-------------|---------------|-------------|---------------|
| 7    | 34.8      | 0.0003      | 0.474         | -0.0000     | 0.002         | -0.0035     | 0.027         |
| 8    | 35.3      | 0.0000      | 0.001         | 0.0003      | 0.361         | 0.0016      | 0.115         |
| 9    | 85.3      | -0.0000     | 0.049         | 0.0001      | 0.9447        | -0.0000     | 0.303         |
| 10   | 96.3      | 0.0001      | 0.034         | -0.0000     | 0.061         | -0.0011     | 0.054         |
| 11   | 99.9      | -0.0038     | 0.045         | -0.0015     | 0.022         | -0.0012     | 0.002         |
| 12   | 105.2     | 0.0000      | 0.080         | 0.0000      | 0.150         | -0.0000     | 0.005         |
| 13   | 129.3     | 0.0042      | 0.067         | 0.0076      | 0.080         | 0.0267      | 0.059         |
| 14   | 132.7     | 0.0001      | 0.229         | 0.0003      | 0.776         | 0.0003      | 0.233         |
| 15   | 139.3     | -0.0083     | 0.043         | -0.0086     | 0.040         | -0.0346     | 0.039         |
| 16   | 155.2     | -0.0015     | 0.047         | -0.0015     | 0.048         | -0.0043     | 0.048         |
| 17   | 179.2     | 0.0001      | 0.927         | 0.0001      | 0.994         | 0.0003      | 0.905         |
| 18   | 191.3     | -0.0031     | 0.043         | -0.0030     | 0.046         | -0.0117     | 0.047         |
| 19   | 197.1     | -0.0033     | 0.998         | 0.0075      | 0.999         | 0.0038      | 0.999         |
| 20   | 211.2     | -0.0204     | 0.999         | 0.0190      | 0.999         | -0.0020     | 0.999         |
| 21   | 241.5     | 0.0042      | 0.037         | 0.0004      | 0.018         | 0.0245      | 0.056         |
| 22   | 260       | 0.0060      | 0.024         | 0.0075      | 0.026         | 0.0197      | 0.026         |
| 23   | 265       | -0.0054     | 0.994         | 0.0114      | 0.999         | 0.0189      | 0.998         |
| 24   | 272.1     | -0.0048     | 0.999         | 0.0052      | 0.999         | 0.0023      | 0.983         |
| 25   | 293.6     | -0.000      | 0.563         | 0.0005      | 0.995         | 0.0016      | 0.999         |
| 26   | 298.1     | -0.0049     | 0.065         | -0.0030     | 0.044         | -0.0105     | 0.045         |
| 27   | 331.9     | 0.0133      | 0.037         | 0.0141      | 0.033         | 0.0610      | 0.039         |
| 28   | 384       | -0.0001     | 0.880         | 0.0011      | 0.998         | 0.0019      | 0.999         |
| 29   | 399.1     | 0.0226      | 0.045         | 0.0252      | 0.047         | 0.0909      | 0.050         |
| 30   | 439.9     | -0.0097     | 0.998         | -0.0031     | 0.990         | -0.0203     | 0.997         |
| 31   | 447.2     | -0.0213     | 0.042         | -0.0252     | 0.041         | -0.0651     | 0.036         |

**Table S33** | Quadratic fit for g-tensor for **3** with eq. 2 ( $g_{ii} = (a(g_{ii}) * x^2) + g_{eq}$ ) for each component of the g-tensor (x, y, and z). The  $r^2$  value is the coefficient of determination for each quadratic regression.

| Mode | Frequency | $a(g_{xx})$ | $r^2(g_{xx})$ | $a(g_{yy})$ | $r^2(g_{yy})$ | $a(g_{zz})$ | $r^2(g_{zz})$ |
|------|-----------|-------------|---------------|-------------|---------------|-------------|---------------|
| 7    | 49.4      | -0.0009     | 1.000         | -0.0009     | 1.000         | -0.0006     | 0.999         |
| 8    | 49.8      | 0.0000      | 0.998         | 0.0000      | 0.999         | 0.0000      | 0.999         |
| 9    | 69.4      | 0.0012      | 1.000         | 0.0004      | 1.000         | -0.0036     | 1.000         |
| 10   | 78.8      | 0.0000      | 0.993         | 0.0000      | 0.880         | 0.0000      | 0.992         |
| 11   | 93.5      | 0.0000      | 0.882         | 0.0000      | 0.860         | 0.0000      | 0.999         |
| 12   | 101.9     | 0.0000      | 0.910         | 0.0000      | 0.944         | -0.0000     | 0.999         |
| 13   | 123.6     | 0.0000      | 0.999         | 0.0000      | 0.999         | 0.0000      | 0.999         |
| 14   | 150.6     | 0.0000      | 0.999         | 0.0000      | 0.999         | 0.0000      | 0.999         |
| 15   | 180.4     | 0.0000      | 0.995         | 0.0000      | 0.997         | 0.0000      | 0.990         |
| 16   | 185.6     | -0.0004     | 1.000         | 0.0004      | 1.000         | 0.0042      | 1.000         |
| 17   | 190.7     | 0.0000      | 0.995         | 0.0000      | 0.999         | 0.0000      | 1.000         |
| 18   | 199.3     | 0.0035      | 1.000         | 0.0043      | 1.000         | 0.0033      | 1.000         |
| 19   | 225.1     | -0.0029     | 1.000         | -0.0024     | 1.000         | -0.0084     | 1.000         |
| 20   | 228.3     | 0.0000      | 0.970         | 0.0000      | 0.861         | 0.0000      | 0.985         |
| 21   | 230       | 0.0000      | 0.999         | 0.0000      | 0.998         | 0.0000      | 0.999         |
| 22   | 231.8     | 0.0012      | 1.000         | 0.0010      | 1.000         | 0.0031      | 1.000         |
| 23   | 233.1     | 0.0000      | 0.963         | 0.0000      | 0.921         | 0.0000      | 0.923         |
| 24   | 247.9     | 0.0000      | 0.979         | 0.0000      | 0.999         | 0.0000      | 0.999         |
| 25   | 251       | 0.0000      | 0.999         | 0.0000      | 0.999         | 0.0000      | 0.999         |
| 26   | 260.8     | 0.0000      | 0.999         | 0.0000      | 0.999         | 0.0000      | 0.999         |
| 27   | 267.6     | 0.0000      | 0.999         | 0.0000      | 0.999         | 0.0000      | 0.755         |
| 28   | 309       | -0.0026     | 1.00000       | -0.0029     | 1.000         | -0.0179     | 1.000         |
| 29   | 315.2     | 0.0000      | 0.99667       | 0.0000      | 0.999         | -0.0000     | 0.999         |
| 30   | 316.6     | 0.0000      | 0.99541       | 0.0000      | 0.000         | 0.0000      | 0.999         |
| 31   | 339.8     | 0.0000      | 0.13022       | 0.0000      | 0.999         | 0.0000      | 0.999         |
| 32   | 350.1     | 0.0000      | 0.99972       | 0.0000      | 0.999         | 0.0000      | 0.999         |
| 33   | 368.3     | 0.0040      | 1.00000       | 0.0049      | 1.000         | 0.0202      | 1.000         |
| 34   | 380.2     | 0.0000      | 0.99979       | 0.0000      | 0.999         | 0.0000      | 0.999         |
| 35   | 385       | -0.0062     | 1.00000       | -0.0062     | 1.000         | -0.0266     | 1.000         |
| 36   | 409.2     | 0.0000      | 0.99707       | 0.0000      | 0.996         | 0.0000      | 0.999         |
| 37   | 465.7     | 0.0000      | 0.99997       | 0.0000      | 0.999         | 0.0000      | 0.999         |
| 38   | 482.2     | 0.0020      | 1.00000       | 0.0016      | 1.000         | 0.0067      | 1.000         |
| 39   | 494.4     | 0.0000      | 0.99985       | 0.0000      | 0.963         | 0.0000      | 0.999         |

**Table S34** | Linear fit for Cu  $A$ -tensor for **1** with eq. 2 ( $A_{ii} = (a(A_{ii}) * x) + A_{eq}$ ) for each component of the  $A$ -tensor (x, y, and z). The  $r^2$  value is the coefficient of determination for each linear regression.

| Mode | Frequency | $b(A_{xx})$ | $r^2(A_{xx})$ | $b(A_{yy})$ | $r^2(A_{yy})$ | $b(A_{zz})$ | $r^2(A_{zz})$ |
|------|-----------|-------------|---------------|-------------|---------------|-------------|---------------|
| 3    | 7.40      | -155.02     | 0.157         | 155.14      | 0.157         | -0.04       | 0.348         |
| 4    | 14.77     | -155.14     | 0.157         | 154.78      | 0.156         | 0.23        | 0.959         |
| 5    | 20.09     | -155.07     | 0.157         | 154.71      | 0.156         | 0.23        | 0.799         |
| 6    | 38.38     | -155.43     | 0.157         | 155.33      | 0.157         | 0.09        | 0.348         |
| 7    | 40.67     | -154.64     | 0.156         | 155.75      | 0.158         | -0.77       | 0.978         |
| 8    | 56.96     | -158.18     | 0.162         | 147.98      | 0.145         | 5.90        | 1.000         |
| 9    | 74.64     | -154.78     | 0.155         | 154.54      | 0.154         | 0.07        | 0.011         |
| 10   | 90.59     | -154.92     | 0.156         | 155.33      | 0.157         | -0.37       | 0.811         |
| 11   | 112.12    | -140.29     | 0.132         | 177.05      | 0.195         | -29.68      | 1.000         |
| 12   | 115.41    | -162.42     | 0.169         | 144.21      | 0.138         | 14.90       | 1.000         |
| 13   | 132.06    | -155.92     | 0.158         | 153.78      | 0.154         | 0.50        | 0.958         |
| 14   | 133.15    | -152.21     | 0.152         | 158.25      | 0.162         | 0.45        | 0.914         |
| 15   | 143.79    | -155.02     | 0.157         | 155.38      | 0.157         | -0.18       | 0.628         |
| 16   | 145.55    | -154.97     | 0.156         | 155.21      | 0.157         | -0.05       | 0.136         |
| 17   | 149.51    | -156.98     | 0.160         | 169.61      | 0.182         | -3.96       | 0.983         |
| 18   | 158.63    | -155.37     | 0.157         | 154.70      | 0.156         | 0.00        | 0.000         |
| 19   | 161.12    | -155.41     | 0.152         | 155.28      | 0.152         | -0.07       | 0.002         |
| 20   | 188.66    | -146.92     | 0.143         | 165.16      | 0.174         | -21.18      | 1.000         |
| 21   | 189.18    | -155.38     | 0.157         | 154.57      | 0.156         | 0.87        | 0.903         |
| 22   | 211.25    | -98.16      | 0.055         | 108.43      | 0.055         | -5.86       | 0.038         |
| 23   | 219.52    | -95.95      | 0.054         | 94.08       | 0.052         | 1.50        | 0.996         |
| 24   | 225.45    | -95.90      | 0.054         | 95.27       | 0.053         | 0.45        | 0.810         |
| 25   | 227.33    | -94.72      | 0.053         | 95.18       | 0.054         | -0.34       | 0.406         |
| 26   | 230.58    | -126.08     | 0.090         | 65.48       | 0.026         | 49.34       | 1.000         |
| 27   | 252.21    | -94.98      | 0.053         | 94.73       | 0.053         | -0.46       | 0.012         |
| 28   | 259.60    | -94.95      | 0.053         | 95.18       | 0.053         | -0.26       | 0.129         |
| 29   | 275.50    | -117.33     | 0.079         | 63.92       | 0.025         | 51.03       | 1.000         |
| 30   | 292.34    | -94.92      | 0.053         | 95.67       | 0.054         | -0.81       | 0.717         |
| 31   | 305.93    | -95.27      | 0.053         | 95.12       | 0.053         | -0.08       | 0.008         |
| 32   | 312.69    | -97.72      | 0.055         | 97.49       | 0.055         | -0.18       | 0.047         |
| 33   | 336.33    | -95.52      | 0.054         | 95.11       | 0.053         | 0.14        | 0.045         |
| 34   | 339.75    | -95.03      | 0.053         | 95.12       | 0.053         | -0.04       | 0.080         |
| 35   | 341.37    | -98.81      | 0.057         | 91.58       | 0.050         | 1.70        | 0.963         |
| 36   | 341.89    | -89.50      | 0.048         | 100.19      | 0.059         | -2.56       | 0.992         |
| 37   | 387.97    | -154.50     | 0.155         | 154.84      | 0.156         | 0.01        | 0.007         |
| 38   | 391.96    | -155.07     | 0.157         | 155.02      | 0.156         | -0.26       | 0.088         |
| 39   | 420.35    | -158.55     | 0.162         | 156.53      | 0.159         | -23.18      | 1.000         |
| 40   | 426.94    | -154.79     | 0.157         | 154.73      | 0.157         | 0.13        | 0.019         |

**Table S35** | Linear fit for Cu *A*-tensor for **2** with eq. 2 ( $A_{ii} = (a(A_{ii}) * x) + A_{eq}$ ) for each component of the *A*-tensor (x, y, and z). The  $r^2$  value is the coefficient of determination for each linear regression.

| Mode | Frequency | b( $A_{xx}$ ) | $r^2$ ( $A_{xx}$ ) | b( $A_{yy}$ ) | $r^2$ ( $A_{yy}$ ) | b( $A_{zz}$ ) | $r^2$ ( $A_{zz}$ ) |
|------|-----------|---------------|--------------------|---------------|--------------------|---------------|--------------------|
| 7    | 34.8      | 2.93          | 0.998              | 2.74          | 1.000              | 5.74          | 0.999              |
| 8    | 35.3      | -0.63         | 0.921              | -0.52         | 0.958              | -1.08         | 0.997              |
| 9    | 85.3      | 0.04          | 0.348              | 0.03          | 0.065              | 0.00          | nan                |
| 10   | 96.3      | 0.41          | 0.939              | 0.47          | 0.983              | 0.99          | 0.996              |
| 11   | 99.9      | -1.63         | 0.973              | -1.83         | 0.997              | 1.89          | 0.895              |
| 12   | 105.2     | -0.03         | 0.065              | 0.04          | 0.348              | 0.10          | 0.543              |
| 13   | 129.3     | -10.11        | 0.991              | -8.93         | 0.993              | -17.63        | 0.990              |
| 14   | 132.7     | 0.01          | 0.004              | 0.11          | 0.272              | 0.01          | 0.002              |
| 15   | 139.3     | 1.32          | 0.957              | 0.28          | 0.735              | 12.44         | 0.997              |
| 16   | 155.2     | 0.39          | 0.935              | 0.34          | 0.950              | -0.04         | 0.345              |
| 17   | 179.2     | -0.06         | 0.141              | 0.00          | nan                | -0.04         | 0.340              |
| 18   | 191.3     | 1.19          | 0.996              | 0.71          | 0.989              | 3.34          | 1.000              |
| 19   | 197.1     | -1.72         | 0.056              | 1.32          | 0.059              | -0.38         | 0.042              |
| 20   | 211.2     | -7.52         | 0.027              | 1.43          | 0.045              | -3.27         | 0.024              |
| 21   | 241.5     | -6.54         | 0.990              | 3.56          | 0.955              | -9.46         | 0.998              |
| 22   | 260       | 0.85          | 0.971              | 2.28          | 0.999              | -11.56        | 1.000              |
| 23   | 265       | 0.06          | 0.022              | -0.20         | 0.032              | -0.66         | 0.046              |
| 24   | 272.1     | -1.38         | 0.026              | 1.12          | 0.026              | -0.25         | 0.018              |
| 25   | 293.6     | -0.60         | 0.076              | -0.32         | 0.050              | -0.55         | 0.053              |
| 26   | 298.1     | 12.60         | 1.000              | 11.22         | 1.000              | 7.35          | 0.991              |
| 27   | 331.9     | 8.66          | 0.898              | -11.40        | 0.988              | -12.48        | 1.000              |
| 28   | 384       | -0.62         | 0.047              | 0.03          | 0.069              | -0.33         | 0.050              |
| 29   | 399.1     | 9.40          | 0.999              | 8.15          | 0.998              | -30.42        | 0.999              |
| 30   | 439.9     | 0.20          | 0.041              | -0.28         | 0.026              | 0.09          | 0.019              |
| 31   | 447.2     | -14.28        | 1.000              | -15.46        | 1.000              | 16.44         | 0.995              |

**Table S36** | Linear fit for Cu  $A$ -tensor for **3** with eq. 2 ( $A_{ii} = (a(A_{ii}) * x) + A_{eq}$ ) for each component of the  $A$ -tensor (x, y, and z). The  $r^2$  value is the coefficient of determination for each linear regression.

| Mode | Frequency | $b(A_{xx})$ | $r^2(A_{xx})$ | $b(A_{yy})$ | $r^2(A_{yy})$ | $b(A_{zz})$ | $r^2(A_{zz})$ |
|------|-----------|-------------|---------------|-------------|---------------|-------------|---------------|
| 7    | 49.4      | 0.04        | 0.348         | 0.09        | 0.696         | -2.08       | 0.999         |
| 8    | 49.8      | 0.00        | 0.000         | 0.00        | nan           | 0.00        | 0.000         |
| 9    | 69.4      | 3.88        | 0.999         | 3.46        | 0.999         | 9.62        | 0.999         |
| 10   | 78.8      | -0.03       | 0.065         | 0.00        | nan           | 0.00        | nan           |
| 11   | 93.5      | 0.00        | nan           | 0.00        | nan           | -0.03       | 0.065         |
| 12   | 101.9     | 0.10        | 0.009         | 0.00        | nan           | 0.07        | 0.011         |
| 13   | 123.6     | -0.03       | 0.065         | 0.00        | nan           | -0.03       | 0.022         |
| 14   | 150.6     | -0.07       | 0.071         | -0.03       | 0.022         | -0.13       | 0.104         |
| 15   | 180.4     | 0.00        | nan           | 0.00        | nan           | -0.03       | 0.022         |
| 16   | 185.6     | -13.61      | 1.000         | -11.21      | 0.999         | -17.87      | 0.999         |
| 17   | 190.7     | -0.80       | 0.022         | 0.33        | 0.013         | -0.97       | 0.047         |
| 18   | 199.3     | 9.60        | 0.998         | 9.42        | 0.997         | 23.30       | 0.996         |
| 19   | 225.1     | 0.98        | 0.973         | 4.68        | 0.998         | 10.18       | 0.999         |
| 20   | 228.3     | 0.00        | nan           | 0.00        | nan           | 0.00        | nan           |
| 21   | 230       | 0.14        | 0.019         | -0.01       | 0.002         | 0.05        | 0.026         |
| 22   | 231.8     | 1.26        | 0.999         | 0.42        | 0.981         | -0.14       | 0.918         |
| 23   | 233.1     | 0.00        | nan           | 0.00        | nan           | 0.00        | nan           |
| 24   | 247.9     | 0.14        | 0.023         | -0.01       | 0.001         | 0.05        | 0.001         |
| 25   | 251       | -0.04       | 0.019         | 0.03        | 0.065         | -0.03       | 0.022         |
| 26   | 260.8     | -10.46      | 0.043         | 2.08        | 0.448         | -4.45       | 0.029         |
| 27   | 267.6     | 0.03        | 0.022         | -0.03       | 0.022         | -0.20       | 0.041         |
| 28   | 309       | -1.36       | 0.998         | -2.71       | 0.999         | 10.68       | 0.999         |
| 29   | 315.2     | 0.00        | nan           | 0.00        | 0.000         | -0.04       | 0.022         |
| 30   | 316.6     | 0.04        | 0.010         | -0.20       | 0.038         | -0.06       | 0.027         |
| 31   | 339.8     | 0.09        | 0.178         | -0.10       | 0.038         | -0.06       | 0.027         |
| 32   | 350.1     | -0.54       | 0.060         | 0.19        | 0.044         | -0.14       | 0.038         |
| 33   | 368.3     | 14.04       | 0.999         | 12.86       | 0.999         | 5.04        | 0.989         |
| 34   | 380.2     | 0.00        | 0.000         | 0.11        | 0.060         | -0.04       | 0.010         |
| 35   | 385       | -0.86       | 0.989         | -5.10       | 0.999         | 11.83       | 0.998         |
| 36   | 409.2     | -0.03       | 0.026         | -0.10       | 0.418         | -0.18       | 0.073         |
| 37   | 465.7     | -0.06       | 0.071         | 0.03        | 0.065         | -0.08       | 0.038         |
| 38   | 482.2     | -15.82      | 0.999         | -14.23      | 0.999         | -16.08      | 0.999         |
| 39   | 494.4     | 0.03        | 0.022         | 0.08        | 0.060         | -0.12       | 0.032         |

**Table S37** | Quadratic fit of Cu *A*-tensor for **1** with eq. 2 ( $A_{ii} = (a(A_{ii}) * x^2) + A_{eq}$ ) for each component of the *A*-tensor (x, y, and z). The  $r^2$  value is the coefficient of determination for each quadratic regression.

| Mode | Frequency | $b(A_{xx})$ | $r^2(A_{xx})$ | $b(A_{yy})$ | $r^2(A_{yy})$ | $b(A_{zz})$ | $r^2(A_{zz})$ |
|------|-----------|-------------|---------------|-------------|---------------|-------------|---------------|
| 3    | 7.4       | -4481.23    | 0.694         | 4481.598    | 0.694         | -0.65574    | 0.420         |
| 4    | 14.77     | -4481.6     | 0.694         | 4480.656    | 0.694         | 0.532787    | 0.028         |
| 5    | 20.09     | -4480.57    | 0.694         | 4480.943    | 0.694         | -0.77869    | 0.049         |
| 6    | 38.38     | -4485.33    | 0.694         | 4486.475    | 0.694         | -1.31148    | 0.420         |
| 7    | 40.67     | -4480.12    | 0.694         | 4483.238    | 0.693         | -3.72951    | 0.121         |
| 8    | 56.96     | -4489.8     | 0.692         | 4461.23     | 0.697         | 16.51639    | 0.042         |
| 9    | 74.64     | -4506.72    | 0.697         | 4514.918    | 0.698         | -7.95082    | 0.894         |
| 10   | 90.59     | -4480.04    | 0.694         | 4482.787    | 0.694         | -3.44262    | 0.373         |
| 11   | 112.12    | -4436.84    | 0.700         | 4547.828    | 0.682         | -90.6147    | 0.049         |
| 12   | 115.41    | -4502.17    | 0.690         | 4449.959    | 0.699         | 41.76231    | 0.042         |
| 13   | 132.06    | -4482.99    | 0.693         | 4477.705    | 0.694         | 0.163934    | 0.001         |
| 14   | 133.15    | -4472.25    | 0.695         | 4490.615    | 0.692         | -0.36885    | 0.003         |
| 15   | 143.79    | -4481.23    | 0.694         | 4482.172    | 0.694         | -2.2541     | 0.496         |
| 16   | 145.55    | -4480.7     | 0.694         | 4482.418    | 0.694         | -1.84426    | 0.830         |
| 17   | 149.51    | -4489.1     | 0.693         | 4522.705    | 0.686         | -18.6066    | 0.115         |
| 18   | 158.63    | -4480.82    | 0.694         | 4483.278    | 0.694         | -7.45902    | 0.953         |
| 19   | 161.12    | -4589.67    | 0.705         | 4599.262    | 0.706         | -18.2787    | 0.971         |
| 20   | 188.66    | -4456.43    | 0.697         | 4511.27     | 0.689         | -65.5328    | 0.051         |
| 21   | 189.18    | -4482.17    | 0.694         | 4479.099    | 0.694         | -1.22951    | 0.010         |
| 22   | 211.25    | -4840.18    | 0.672         | 5592.852    | 0.732         | -425.799    | 0.999         |
| 23   | 219.52    | -4748.12    | 0.666         | 4744.169    | 0.666         | 2.076677    | 0.010         |
| 24   | 225.45    | -4754.39    | 0.666         | 4755.391    | 0.666         | -1.95687    | 0.077         |
| 25   | 227.33    | -4743.21    | 0.665         | 4738.338    | 0.665         | 4.872204    | 0.417         |
| 26   | 230.58    | -4817.01    | 0.659         | 4674.92     | 0.665         | 104.6326    | 0.023         |
| 27   | 252.21    | -4731.63    | 0.664         | 4725.759    | 0.664         | -58.3866    | 0.998         |
| 28   | 259.6     | -4744.61    | 0.665         | 4743.69     | 0.665         | -9.98403    | 0.951         |
| 29   | 275.5     | -4799.88    | 0.662         | 4672.364    | 0.665         | 104.6725    | 0.021         |
| 30   | 292.34    | -4762.22    | 0.667         | 4755.95     | 0.666         | 5.071885    | 0.141         |
| 31   | 305.93    | -4762.02    | 0.667         | 4758.706    | 0.667         | -12.9393    | 0.992         |
| 32   | 312.69    | -4855.27    | 0.675         | 4840.295    | 0.674         | -11.5815    | 0.981         |
| 33   | 336.33    | -4742.65    | 0.665         | 4756.27     | 0.667         | -8.70607    | 0.863         |
| 34   | 339.75    | -4745.73    | 0.666         | 4745.767    | 0.666         | -1.67732    | 0.704         |
| 35   | 341.37    | -4754.59    | 0.665         | 4738.578    | 0.666         | -0.79872    | 0.001         |
| 36   | 341.89    | -4733.07    | 0.666         | 4757.947    | 0.665         | -8.70607    | 0.057         |
| 37   | 387.97    | -4494.51    | 0.696         | 4494.959    | 0.695         | -0.86066    | 0.241         |
| 38   | 391.96    | -4480.57    | 0.694         | 4482.541    | 0.694         | -12.0492    | 0.991         |
| 39   | 420.35    | -4495.86    | 0.693         | 4480.697    | 0.692         | -75.2049    | 0.056         |
| 40   | 426.94    | -4463.4     | 0.692         | 4466.189    | 0.692         | 12.95082    | 0.992         |

**Table S38** | Quadratic fit for Cu  $A$ -tensor data for **2** with eq. 2 ( $A_{ii} = (a(A_{ii}) * x^2) + A_{eq}$ ) for each component of the  $A$ -tensor (x, y, and z). The  $r^2$  value is the coefficient of determination for each quadratic regression.

| Mode | Frequency | $b(A_{xx})$ | $r^2(A_{xx})$ | $b(A_{yy})$ | $r^2(A_{yy})$ | $b(A_{zz})$ | $r^2(A_{zz})$ |
|------|-----------|-------------|---------------|-------------|---------------|-------------|---------------|
| 7    | 34.8      | 6.60        | 0.032         | 7.38        | 0.046         | 13.60       | 0.036         |
| 8    | 35.3      | -4.28       | 0.213         | -0.17       | 0.001         | -3.85       | 0.063         |
| 9    | 85.3      | -0.57       | 0.420         | 1.45        | 0.919         | 0.00        | nan           |
| 10   | 96.3      | 0.26        | 0.002         | 2.29        | 0.113         | 3.87        | 0.075         |
| 11   | 99.9      | -7.67       | 0.137         | -6.02       | 0.069         | -2.81       | 0.013         |
| 12   | 105.2     | -1.48       | 0.919         | 0.58        | 0.420         | 1.08        | 0.369         |
| 13   | 129.3     | -44.13      | 0.092         | -37.78      | 0.087         | -79.11      | 0.098         |
| 14   | 132.7     | -2.18       | 0.888         | 2.37        | 0.788         | -3.41       | 0.928         |
| 15   | 139.3     | 0.19        | 0.000         | -1.32       | 0.095         | 26.56       | 0.025         |
| 16   | 155.2     | 0.26        | 0.002         | 1.76        | 0.140         | -0.65       | 0.416         |
| 17   | 179.2     | -1.90       | 0.842         | 0.00        | nan           | -0.67       | 0.412         |
| 18   | 191.3     | 2.78        | 0.028         | 2.83        | 0.079         | 10.23       | 0.048         |
| 19   | 197.1     | -96.28      | 0.999         | 71.68       | 0.999         | -24.45      | 0.999         |
| 20   | 211.2     | -657.36     | 0.998         | 91.43       | 0.887         | -305.66     | 0.999         |
| 21   | 241.5     | -11.58      | 0.013         | 23.25       | 0.173         | -36.89      | 0.064         |
| 22   | 260       | 0.08        | 0.000         | 4.65        | 0.032         | -23.17      | 0.031         |
| 23   | 265       | 8.56        | 0.971         | -26.16      | 0.994         | -71.56      | 1.000         |
| 24   | 272.1     | -110.23     | 0.998         | 89.06       | 0.997         | -24.07      | 0.998         |
| 25   | 293.6     | -28.35      | 0.997         | -18.46      | 0.998         | -31.23      | 0.999         |
| 26   | 298.1     | 37.15       | 0.049         | 34.44       | 0.054         | 13.52       | 0.019         |
| 27   | 331.9     | -13.26      | 0.012         | -16.47      | 0.011         | -37.41      | 0.050         |
| 28   | 384       | -38.69      | 0.999         | 1.62        | 0.926         | -19.72      | 0.998         |
| 29   | 399.1     | 31.53       | 0.059         | 28.87       | 0.066         | -100.19     | 0.057         |
| 30   | 439.9     | 13.73       | 0.998         | -23.35      | 0.996         | 8.37        | 0.985         |
| 31   | 447.2     | -39.15      | 0.041         | -41.05      | 0.038         | 31.41       | 0.020         |

**Table S39** | Quadratic fit for Cu *A*-tensor data for **3** with eq. 2 ( $A_{ii} = (a(A_{ii}) * x^2) + A_{eq}$ ) for each component of the *A*-tensor (x, y, and z). The  $r^2$  value is the coefficient of determination for each quadratic regression.

| Mode | Frequency | $a(A_{xx})$ | $r^2(A_{xx})$ | $a(A_{yy})$ | $r^2(A_{yy})$ | $a(A_{zz})$ | $r^2(A_{zz})$ |
|------|-----------|-------------|---------------|-------------|---------------|-------------|---------------|
| 7    | 49.4      | 0.04        | 0.348         | 0.09        | 0.696         | -2.08       | 0.999         |
| 8    | 49.8      | 0.00        | 0.000         | 0.00        | nan           | 0.00        | 0.000         |
| 9    | 69.4      | 3.88        | 0.999         | 3.46        | 0.999         | 9.62        | 1.000         |
| 10   | 78.8      | -0.03       | 0.065         | 0.00        | nan           | 0.00        | nan           |
| 11   | 93.5      | 0.00        | nan           | 0.00        | nan           | -0.03       | 0.065         |
| 12   | 101.9     | 0.10        | 0.009         | 0.00        | nan           | 0.07        | 0.011         |
| 13   | 123.6     | -0.03       | 0.065         | 0.00        | nan           | -0.03       | 0.022         |
| 14   | 150.6     | -0.07       | 0.071         | -0.03       | 0.022         | -0.13       | 0.104         |
| 15   | 180.4     | 0.00        | nan           | 0.00        | nan           | -0.03       | 0.022         |
| 16   | 185.6     | -13.61      | 1.000         | -11.21      | 1.000         | -17.87      | 1.000         |
| 17   | 190.7     | -0.80       | 0.022         | 0.33        | 0.013         | -0.97       | 0.047         |
| 18   | 199.3     | 9.60        | 0.998         | 9.42        | 0.999         | 23.30       | 0.996         |
| 19   | 225.1     | 0.98        | 0.973         | 4.68        | 0.998         | 10.18       | 1.000         |
| 20   | 228.3     | 0.00        | nan           | 0.00        | nan           | 0.00        | nan           |
| 21   | 230       | 0.14        | 0.019         | -0.01       | 0.002         | 0.05        | 0.026         |
| 22   | 231.8     | 1.26        | 0.999         | 0.42        | 0.981         | -0.14       | 0.918         |
| 23   | 233.1     | 0.00        | nan           | 0.00        | nan           | 0.00        | nan           |
| 24   | 247.9     | 0.14        | 0.023         | -0.01       | 0.001         | 0.05        | 0.001         |
| 25   | 251       | -0.04       | 0.019         | 0.03        | 0.065         | -0.03       | 0.022         |
| 26   | 260.8     | -10.46      | 0.043         | 2.08        | 0.448         | -4.45       | 0.029         |
| 27   | 267.6     | 0.03        | 0.022         | -0.03       | 0.022         | -0.20       | 0.041         |
| 28   | 309       | -1.36       | 0.998         | -2.71       | 1.000         | 10.68       | 1.000         |
| 29   | 315.2     | 0.00        | nan           | 0.00        | 0.000         | -0.04       | 0.022         |
| 30   | 316.6     | 0.04        | 0.010         | -0.20       | 0.038         | -0.06       | 0.027         |
| 31   | 339.8     | 0.09        | 0.178         | -0.10       | 0.038         | -0.06       | 0.027         |
| 32   | 350.1     | -0.54       | 0.060         | 0.19        | 0.044         | -0.14       | 0.038         |
| 33   | 368.3     | 14.04       | 1.000         | 12.86       | 1.000         | 5.04        | 0.989         |
| 34   | 380.2     | 0.00        | 0.000         | 0.11        | 0.060         | -0.04       | 0.010         |
| 35   | 385       | -0.86       | 0.989         | -5.10       | 0.999         | 11.83       | 0.998         |
| 36   | 409.2     | -0.03       | 0.026         | -0.10       | 0.418         | -0.18       | 0.073         |
| 37   | 465.7     | -0.06       | 0.071         | 0.03        | 0.065         | -0.08       | 0.038         |
| 38   | 482.2     | -15.82      | 1.000         | -14.23      | 1.000         | -16.08      | 0.999         |
| 39   | 494.4     | 0.03        | 0.022         | 0.08        | 0.060         | -0.12       | 0.032         |

**Table S40** | Linear fit for N  $A$ -tensor data for **1** with eq. 2 ( $A_{ii} = (a(A_{ii}) * x) + A_{eq}$ ) for each component of the  $A$ -tensor (x, y, and z). The  $r^2$  value is the coefficient of determination for each linear regression.

| Mode | Frequency | $b(A_{xx})$ | $r^2(A_{xx})$ | $b(A_{yy})$ | $r^2(A_{yy})$ | $b(A_{zz})$ | $r^2(A_{zz})$ |
|------|-----------|-------------|---------------|-------------|---------------|-------------|---------------|
| 3    | 7.40      | 0.02        | 0.532         | -0.02       | 0.261         | -0.02       | 0.696         |
| 4    | 14.77     | 0.01        | 0.196         | 0.01        | 0.098         | 0.02        | 0.464         |
| 5    | 20.09     | 0.04        | 0.918         | 0.01        | 0.348         | 0.02        | 0.696         |
| 6    | 38.38     | 0.02        | 0.087         | 0.02        | 0.533         | 0.04        | 0.852         |
| 7    | 40.67     | -0.06       | 0.957         | -0.04       | 0.795         | -0.049      | 0.880         |
| 8    | 56.96     | 0.59        | 0.999         | 0.52        | 0.997         | 0.59        | 0.999         |
| 9    | 74.64     | 0.01        | 0.196         | 0.00        | 0.000         | -0.00       | 0.011         |
| 10   | 90.59     | -0.05       | 0.898         | -0.04       | 0.609         | -0.02       | 0.533         |
| 11   | 112.12    | -3.07       | 0.999         | -3.12       | 0.999         | -2.81       | 0.999         |
| 12   | 115.41    | 1.57        | 0.999         | 1.61        | 0.999         | 1.41        | 0.999         |
| 13   | 132.06    | 0.10        | 0.960         | 0.10        | 0.960         | 0.17        | 0.986         |
| 14   | 133.15    | -0.13       | 0.985         | -0.13       | 0.900         | -0.42       | 0.999         |
| 15   | 143.79    | -0.02       | 0.696         | -0.02       | 0.464         | -0.01       | 0.098         |
| 16   | 145.55    | -0.02       | 0.533         | 0.00        | 0.007         | -0.01       | 0.181         |
| 17   | 149.51    | -0.20       | 0.951         | -0.23       | 0.990         | -0.40       | 0.995         |
| 18   | 158.63    | 0.016       | 0.391         | 0.02        | 0.199         | 0.03        | 0.725         |
| 19   | 161.12    | -0.010      | 0.348         | -0.02       | 0.464         | 0.01        | 0.272         |
| 20   | 188.66    | -2.69       | 0.999         | -2.75       | 0.999         | -2.13       | 0.999         |
| 21   | 189.18    | 0.12        | 0.935         | 0.11        | 0.914         | 0.09        | 0.890         |
| 22   | 211.25    | 0.03        | 0.480         | 0.05        | 0.735         | 0.03        | 0.403         |
| 23   | 219.52    | 0.15        | 0.975         | 0.17        | 0.984         | 0.14        | 0.985         |
| 24   | 225.45    | 0.05        | 0.903         | 0.06        | 0.781         | 0.05        | 0.903         |
| 25   | 227.33    | -0.03       | 0.483         | -0.03       | 0.807         | -0.03       | 0.320         |
| 26   | 230.58    | 4.62        | 0.999         | 4.68        | 0.999         | 4.45        | 0.999         |
| 27   | 252.21    | -0.05       | 0.035         | -0.03       | 0.012         | -0.01       | 0.004         |
| 28   | 259.60    | -0.04       | 0.074         | -0.04       | 0.099         | -0.03       | 0.097         |
| 29   | 275.50    | 8.03        | 0.999         | 8.16        | 0.999         | 6.90        | 0.999         |
| 30   | 292.34    | -0.15       | 0.657         | -0.14       | 0.720         | -0.13       | 0.733         |
| 31   | 305.93    | -0.01       | 0.002         | -0.02       | 0.004         | 0.02        | 0.008         |
| 32   | 312.69    | -0.01       | 0.007         | -0.00       | 0.001         | 0.03        | 0.095         |
| 33   | 336.33    | 0.04        | 0.784         | 0.02        | 0.360         | -0.01       | 0.080         |
| 34   | 339.75    | 0.00        | nan           | -0.01       | 0.040         | -0.01       | 0.250         |
| 35   | 341.37    | -0.59       | 0.997         | -0.62       | 0.995         | -0.43       | 0.993         |
| 36   | 341.89    | 1.04        | 0.999         | 1.06        | 0.999         | 0.79        | 0.999         |
| 37   | 387.97    | 0.03        | 0.438         | 0.01        | 0.043         | 0.05        | 0.785         |
| 38   | 391.96    | -0.07       | 0.880         | -0.08       | 0.932         | -0.06       | 0.809         |
| 39   | 420.35    | -6.25       | 0.999         | -6.34       | 0.999         | -5.73       | 0.999         |
| 40   | 426.94    | -0.00       | 0.007         | 0.00        | nan           | 0.03        | 0.543         |

**Table S41** | Linear fit for N  $A$ -tensor data for **2** with eq. 2 ( $A_{ii} = (a(A_{ii}) * x) + A_{eq}$ ) for each component of the  $A$ -tensor (x, y, and z). The  $r^2$  value is the coefficient of determination for each linear regression.

| Mode | Frequency | b( $A_{xx}$ ) | $r^2$ ( $A_{xx}$ ) | b( $A_{yy}$ ) | $r^2$ ( $A_{yy}$ ) | b( $A_{zz}$ ) | $r^2$ ( $A_{zz}$ ) |
|------|-----------|---------------|--------------------|---------------|--------------------|---------------|--------------------|
| 7    | 34.8      | 0.21          | 0.983              | 0.19          | 0.848              | 0.28          | 0.988              |
| 8    | 35.3      | -0.04         | 0.696              | -0.07         | 0.918              | -0.01         | 0.022              |
| 9    | 85.3      | 0.00          | nan                | -0.01         | 0.087              | 0.00          | nan                |
| 10   | 96.3      | -0.06         | 0.877              | 0.00          | nan                | 0.00          | nan                |
| 11   | 99.9      | -0.75         | 0.999              | -0.87         | 0.996              | -1.14         | 0.998              |
| 12   | 105.2     | -0.02         | 0.348              | -0.03         | 0.272              | 0.00          | nan                |
| 13   | 129.3     | 0.72          | 0.859              | 0.90          | 0.902              | 0.83          | 0.883              |
| 14   | 132.7     | -0.02         | 0.022              | -0.05         | 0.117              | -0.03         | 0.054              |
| 15   | 139.3     | -2.27         | 0.998              | -2.21         | 0.997              | -2.40         | 0.998              |
| 16   | 155.2     | -0.38         | 0.995              | -0.39         | 0.990              | -0.36         | 0.986              |
| 17   | 179.2     | 0.00          | nan                | 0.02          | 0.340              | 0.00          | nan                |
| 18   | 191.3     | 0.26          | 1.000              | 0.23          | 0.959              | 0.33          | 0.996              |
| 19   | 197.1     | -0.04         | 0.533              | -0.02         | 0.065              | 0.00          | nan                |
| 20   | 211.2     | -0.02         | 0.180              | -0.02         | 0.080              | 0.00          | nan                |
| 21   | 241.5     | -3.82         | 0.998              | -4.03         | 0.999              | -3.59         | 0.997              |
| 22   | 260       | -3.29         | 1.000              | -3.26         | 1.000              | -3.17         | 1.000              |
| 23   | 265       | 0.00          | nan                | -0.01         | 0.007              | 0.00          | nan                |
| 24   | 272.1     | 0.01          | 0.029              | -0.01         | 0.006              | 0.00          | 0.000              |
| 25   | 293.6     | -0.02         | 0.340              | 0.00          | 0.000              | 0.00          | nan                |
| 26   | 298.1     | -1.12         | 0.980              | -1.46         | 0.984              | -0.86         | 0.969              |
| 27   | 331.9     | -1.13         | 0.954              | -1.31         | 0.953              | -3.83         | 0.995              |
| 28   | 384       | -0.02         | 0.340              | -0.02         | 0.050              | 0.01          | 0.039              |
| 29   | 399.1     | 1.39          | 0.998              | 1.51          | 1.000              | 3.72          | 1.000              |
| 30   | 439.9     | -0.03         | 0.026              | -0.04         | 0.140              | -0.03         | 0.050              |
| 31   | 447.2     | 17.41         | 1.000              | 17.73         | 1.000              | 19.55         | 1.000              |

**Table S42** | Linear fit for N  $A$ -tensor data for **3** with eq. 2 ( $A_{ii} = (a(A_{ii}) * x) + A_{eq}$ ) for each component of the  $A$ -tensor (x, y, and z). The  $r^2$  value is the coefficient of determination for each linear regression.

| <i>Mode</i> | <i>Frequency</i> | $b(A_{xx})$ | $r^2(A_{xx})$ | $b(A_{yy})$ | $r^2(A_{yy})$ | $b(A_{zz})$ | $r^2(A_{zz})$ |
|-------------|------------------|-------------|---------------|-------------|---------------|-------------|---------------|
| 7           | 49.4             | −0.64       | 0.996         | −0.67       | 0.999         | −0.64       | 0.999         |
| 8           | 49.8             | −0.03       | 0.543         | 0.00        | 0.000         | 0.00        | 0.003         |
| 9           | 69.4             | 0.34        | 0.986         | 0.46        | 0.999         | 0.66        | 0.999         |
| 10          | 78.8             | −0.01       | 0.136         | −0.02       | 0.587         | −0.01       | 0.348         |
| 11          | 93.5             | −0.01       | 0.136         | 0.01        | 0.348         | 0.00        | nan           |
| 12          | 101.9            | −0.02       | 0.157         | −0.01       | 0.070         | −0.02       | 0.199         |
| 13          | 123.6            | −0.01       | 0.022         | −0.01       | 0.065         | −0.02       | 0.139         |
| 14          | 150.6            | 0.04        | 0.852         | 0.01        | 0.196         | −0.02       | 0.278         |
| 15          | 180.4            | −0.01       | 0.070         | −0.02       | 0.532         | −0.01       | 0.065         |
| 16          | 185.6            | −0.34       | 0.980         | −0.49       | 0.999         | −0.99       | 0.999         |
| 17          | 190.7            | −0.20       | 0.067         | −0.19       | 0.064         | −0.15       | 0.049         |
| 18          | 199.3            | 0.90        | 0.996         | 1.21        | 0.999         | 1.08        | 0.999         |
| 19          | 225.1            | 0.77        | 0.997         | 0.78        | 0.995         | 1.01        | 0.999         |
| 20          | 228.3            | 0.01        | 0.022         | 0.00        | 0.157         | −0.01       | 0.098         |
| 21          | 230              | 0.00        | 0.000         | 0.01        | 0.348         | −0.02       | 0.293         |
| 22          | 231.8            | −0.42       | 0.994         | −0.39       | 0.998         | −0.40       | 0.996         |
| 23          | 233.1            | −0.03       | 0.783         | 0.00        | 0.157         | −0.00       | 0.004         |
| 24          | 247.9            | −0.00       | 0.004         | −0.02       | 0.032         | −0.01       | 0.018         |
| 25          | 251              | −0.02       | 0.073         | −0.01       | 0.027         | −0.01       | 0.018         |
| 26          | 260.8            | −0.03       | 0.051         | −0.03       | 0.054         | −0.04       | 0.087         |
| 27          | 267.6            | −0.03       | 0.051         | −0.03       | 0.044         | −0.04       | 0.066         |
| 28          | 309              | 2.48        | 0.999         | 2.48        | 0.999         | 2.52        | 0.999         |
| 29          | 315.2            | 0.00        | 0.000         | −0.00       | 0.007         | −0.02       | 0.391         |
| 30          | 316.6            | −0.06       | 0.414         | −0.03       | 0.126         | −0.03       | 0.084         |
| 31          | 339.8            | −0.04       | 0.328         | −0.01       | 0.087         | −0.02       | 0.107         |
| 32          | 350.1            | −0.07       | 0.161         | −0.05       | 0.078         | −0.03       | 0.015         |
| 33          | 368.3            | −3.76       | 0.999         | −3.40       | 0.999         | −3.34       | 0.999         |
| 34          | 380.2            | −0.02       | 0.355         | −0.02       | 0.261         | −0.01       | 0.065         |
| 35          | 385              | 2.96        | 0.999         | 2.99        | 0.999         | 2.84        | 0.999         |
| 36          | 409.2            | −0.03       | 0.060         | −0.01       | 0.022         | −0.02       | 0.033         |
| 37          | 465.7            | −0.00       | 0.001         | −0.01       | 0.029         | −0.02       | 0.107         |
| 38          | 482.2            | 3.44        | 0.999         | 3.20        | 0.99884       | 2.07582     | 0.997         |
| 39          | 494.4            | 0.03        | 0.029         | 0.05        | 0.05280       | 0.05310     | 0.0654        |

**Table S43** | Quadratic fit for N  $A$ -tensor for **1** with eq. 2 ( $A_{ii} = (a(A_{ii}) * x^2) + A_{eq}$ ) for each component of the  $A$ -tensor (x, y, and z). The  $r^2$  value is the coefficient of determination for each quadratic regression.

| Mode | Frequency | $b(A_{xx})$ | $r^2(A_{xx})$ | $b(A_{yy})$ | $r^2(A_{yy})$ | $b(A_{zz})$ | $r^2(A_{zz})$ |
|------|-----------|-------------|---------------|-------------|---------------|-------------|---------------|
| 3    | 7.4       | 0.26        | 0.512         | -0.14       | 0.107         | 0.00        | 0.000         |
| 4    | 14.77     | 0.09        | 0.133         | -0.17       | 0.237         | 0.27        | 0.369         |
| 5    | 20.09     | 0.13        | 0.070         | -0.16       | 0.420         | 0.00        | 0.000         |
| 6    | 38.38     | 0.51        | 0.455         | -0.07       | 0.040         | 0.14        | 0.064         |
| 7    | 40.67     | -0.14       | 0.029         | -0.23       | 0.113         | 0.02        | 0.001         |
| 8    | 56.96     | 1.70        | 0.045         | 1.39        | 0.039         | 1.71        | 0.045         |
| 9    | 74.64     | 0.09        | 0.133         | -0.27       | 0.369         | 0.26        | 0.512         |
| 10   | 90.59     | -0.30       | 0.197         | -0.47       | 0.496         | -0.26       | 0.512         |
| 11   | 112.12    | -9.41       | 0.050         | -9.44       | 0.048         | -8.31       | 0.046         |
| 12   | 115.41    | 4.61        | 0.046         | 4.58        | 0.043         | 4.20        | 0.047         |
| 13   | 132.06    | 0.40        | 0.080         | 0.07        | 0.003         | 0.30        | 0.017         |
| 14   | 133.15    | -0.46       | 0.063         | -0.71       | 0.135         | -1.40       | 0.059         |
| 15   | 143.79    | 0.00        | 0.000         | -0.27       | 0.370         | 0.17        | 0.237         |
| 16   | 145.55    | -0.26       | 0.512         | -0.22       | 0.241         | -0.22       | 0.241         |
| 17   | 149.51    | -0.25       | 0.007         | -0.80       | 0.064         | -0.87       | 0.024         |
| 18   | 158.63    | -0.12       | 0.118         | -0.29       | 0.184         | 0.04        | 0.009         |
| 19   | 161.12    | 0.16        | 0.420         | -0.27       | 0.369         | 0.13        | 0.139         |
| 20   | 188.66    | -8.27       | 0.050         | -8.37       | 0.049         | -6.40       | 0.048         |
| 21   | 189.18    | -0.05       | 0.001         | -0.09       | 0.003         | -0.10       | 0.007         |
| 22   | 211.25    | -0.32       | 0.273         | -0.27       | 0.097         | -0.35       | 0.326         |
| 23   | 219.52    | 0.44        | 0.044         | 0.18        | 0.006         | 0.21        | 0.011         |
| 24   | 225.45    | -0.07       | 0.001         | -0.27       | 0.073         | 0.25        | 0.125         |
| 25   | 227.33    | 0.31        | 0.219         | -0.09       | 0.043         | 0.48        | 0.409         |
| 26   | 230.58    | 10.33       | 0.025         | 10.46       | 0.025         | 10.37       | 0.027         |
| 27   | 252.21    | -3.94       | 0.997         | -4.10343    | 0.99573       | -2.82548    | 0.984         |
| 28   | 259.6     | -1.80       | 0.977         | -1.75719    | 0.95159       | -1.42772    | 0.933         |
| 29   | 275.5     | 16.57       | 0.021         | 16.92293    | 0.02155       | 14.37700    | 0.022         |
| 30   | 292.34    | -1.69       | 0.430         | -1.46765    | 0.41094       | -1.30791    | 0.386         |
| 31   | 305.93    | -3.41       | 0.968         | -3.37460    | 0.97074       | -3.07508    | 0.935         |
| 32   | 312.69    | -0.78       | 0.884         | -1.02835    | 0.89196       | -0.99840    | 0.761         |
| 33   | 336.33    | 0.06        | 0.012         | 0.11981     | 0.11502       | 0.03994     | 0.026         |
| 34   | 339.75    | 0.00        | nan           | -0.19968    | 0.31949       | -0.12979    | 0.135         |
| 35   | 341.37    | -0.86       | 0.011         | -0.91853    | 0.01094       | -0.51917    | 0.007         |
| 36   | 341.89    | 2.45        | 0.028         | 2.22644     | 0.02197       | 1.81709     | 0.027         |
| 37   | 387.97    | 0.01        | 0.000         | -0.20492    | 0.32787       | 0.23566     | 0.108         |
| 38   | 391.96    | -0.03       | 0.001         | -0.14344    | 0.01530       | 0.18443     | 0.0408        |
| 39   | 420.35    | 17.16       | 0.040         | 17.72541    | 0.04142       | 15.75820    | 0.040         |
| 40   | 426.94    | 0.32        | 0.525         | 0.00000     | nan           | 0.30738     | 0.369         |

**Table S44** | Quadratic fit for N  $A$ -tensor for **2** with eq. 2 ( $A_{ii} = (a(A_{ii}) * x^2) + A_{eq}$ ) for each component of the  $A$ -tensor (x, y, and z). The  $r^2$  value is the coefficient of determination for each quadratic regression.

| Mode | Frequency | $b(A_{xx})$ | $r^2(A_{xx})$ | $b(A_{yy})$ | $r^2(A_{yy})$ | $b(A_{zz})$ | $r^2(A_{zz})$ |
|------|-----------|-------------|---------------|-------------|---------------|-------------|---------------|
| 7    | 34.8      | 0.34        | 0.017         | -0.38       | 0.021         | 0.68        | 0.038         |
| 8    | 35.3      | 0.00        | 0.000         | -0.28       | 0.069         | -0.02       | 0.002         |
| 9    | 85.3      | 0.00        | nan           | -0.07       | 0.026         | 0.00        | nan           |
| 10   | 96.3      | -0.20       | 0.044         | 0.00        | nan           | 0.00        | nan           |
| 11   | 99.9      | -2.07       | 0.048         | -3.01       | 0.075         | -3.63       | 0.064         |
| 12   | 105.2     | 0.29        | 0.419         | -0.23       | 0.139         | 0.00        | nan           |
| 13   | 129.3     | -1.84       | 0.028         | -1.35       | 0.010         | -1.64       | 0.017         |
| 14   | 132.7     | -1.40       | 0.971         | -1.78       | 0.945         | -1.47       | 0.972         |
| 15   | 139.3     | -7.96       | 0.068         | -7.73       | 0.068         | -8.39       | 0.068         |
| 16   | 155.2     | -1.20       | 0.054         | -1.31       | 0.058         | -1.53       | 0.096         |
| 17   | 179.2     | 0.00        | nan           | -0.33       | 0.411         | 0.00        | nan           |
| 18   | 191.3     | 0.77        | 0.046         | 0.56        | 0.028         | 1.05        | 0.051         |
| 19   | 197.1     | -0.48       | 0.512         | -0.78       | 0.919         | 0.00        | nan           |
| 20   | 211.2     | -0.19       | 0.129         | -0.876      | 0.704         | 0.00        | nan           |
| 21   | 241.5     | 10.08       | 0.029         | 11.37       | 0.034         | -9.00       | 0.026         |
| 22   | 260       | -5.95       | 0.025         | -6.25       | 0.028         | -5.65       | 0.024         |
| 23   | 265       | 0.00        | nan           | -1.94       | 0.595         | 0.00        | nan           |
| 24   | 272.1     | -1.01       | 0.862         | -1.28       | 0.892         | -0.66       | 0.658         |
| 25   | 293.6     | -0.29       | 0.409         | -1.07       | 0.785         | 0.00        | nan           |
| 26   | 298.1     | -5.45       | 0.132         | -6.89       | 0.125         | -4.55       | 0.154         |
| 27   | 331.9     | -6.53       | 0.176         | -7.55       | 0.175         | 14.51       | 0.079         |
| 28   | 384       | -0.31       | 0.409         | -0.73       | 0.557         | -0.40       | 0.331         |
| 29   | 399.1     | 4.86        | 0.064         | 4.49        | 0.046         | 11.80       | 0.053         |
| 30   | 439.9     | 2.12        | 0.862         | 1.29        | 0.673         | 1.47        | 0.795         |
| 31   | 447.2     | 55.55       | 0.055         | 56.03       | 0.054         | 62.02       | 0.054         |

**Table S45** | Quadratic fit for N  $A$ -tensor for **3** with eq. 2 ( $A_{ii} = (a(A_{ii}) * x^2) + A_{eq}$ ) for each component of the  $A$ -tensor (x, y, and z). The  $r^2$  value is the coefficient of determination for each quadratic regression.

| Mode | Frequency | $b(A_{xx})$ | $r^2(A_{xx})$ | $b(A_{yy})$ | $r^2(A_{yy})$ | $b(A_{zz})$ | $r^2(A_{zz})$ |
|------|-----------|-------------|---------------|-------------|---------------|-------------|---------------|
| 7    | 49.4      | -0.6        | 0.997         | -0.67       | 0.999         | -0.634      | 0.999         |
| 8    | 49.8      | -0.02       | 0.755         | 0.00        | 0.387         | 0.012       | 0.713         |
| 9    | 69.4      | 0.34        | 0.987         | 0.46        | 0.999         | 0.663       | 0.999         |
| 10   | 78.8      | -0.01       | 0.861         | -0.03       | 0.608         | -0.009      | 0.632         |
| 11   | 93.5      | -0.01       | 0.861         | 0.01        | 0.632         | 0.000       | nan           |
| 12   | 101.9     | -0.01       | 0.743         | -0.00       | 0.762         | -0.013      | 0.856         |
| 13   | 123.6     | 0.00        | 0.656         | -0.00       | 0.921         | -0.013      | 0.531         |
| 14   | 150.6     | 0.04        | 0.855         | 0.01        | 0.272         | -0.019      | 0.363         |
| 15   | 180.4     | -0.00       | 0.644         | -0.02       | 0.860         | -0.002      | 0.921         |
| 16   | 185.6     | -0.33       | 0.991         | -0.49       | 0.999         | -0.994      | 0.999         |
| 17   | 190.7     | -0.04       | 0.999         | -0.03       | 0.999         | -0.005      | 0.999         |
| 18   | 199.3     | 0.91        | 0.999         | 1.21        | 0.999         | 1.089       | 0.999         |
| 19   | 225.1     | 0.76        | 0.998         | 0.77        | 0.999         | 0.999       | 0.999         |
| 20   | 228.3     | 0.00        | 0.052         | 0.00        | 0.743         | -0.007      | 0.104         |
| 21   | 230       | 0.01        | 0.880         | 0.01        | 0.977         | -0.021      | 0.366         |
| 22   | 231.8     | -0.42       | 0.994         | -0.39       | 0.998         | -0.392      | 0.996         |
| 23   | 233.1     | -0.03       | 0.783         | 0.00        | 0.743         | 0.001       | 0.172         |
| 24   | 247.9     | 0.02        | 0.975         | -0.00       | 0.997         | 0.004       | 0.970         |
| 25   | 251       | -0.01       | 0.971         | 0.00        | 0.976         | 0.008       | 0.970         |
| 26   | 260.8     | -0.00       | 0.991         | -0.00       | 0.972         | -0.011      | 0.974         |
| 27   | 267.6     | -0.00       | 0.991         | 0.00        | 0.997         | -0.008      | 0.913         |
| 28   | 309       | 2.48        | 0.999         | 2.48        | 0.999         | 2.521       | 0.999         |
| 29   | 315.2     | -0.01       | 0.445         | -0.01       | 0.586         | -0.023      | 0.631         |
| 30   | 316.6     | -0.05       | 0.942         | -0.01       | 0.911         | -0.009      | 0.945         |
| 31   | 339.8     | -0.03       | 0.922         | -0.00       | 0.736         | -0.009      | 0.948         |
| 32   | 350.1     | -0.04       | 0.902         | -0.01       | 0.976         | 0.022       | 0.973         |
| 33   | 368.3     | -3.76       | 0.999         | -3.40       | 0.999         | -3.334      | 0.999         |
| 34   | 380.2     | -0.03       | 0.511         | -0.02       | 0.310         | -0.002      | 0.921         |
| 35   | 385       | 2.96        | 0.999         | 2.98        | 0.999         | 2.833       | 0.999         |
| 36   | 409.2     | -0.02       | 0.969         | -0.00       | 0.855         | -0.007      | 0.985         |
| 37   | 465.7     | 0.01        | 0.976         | 0.00        | 0.917         | -0.008      | 0.948         |
| 38   | 482.2     | 3.46        | 0.999         | 3.22        | 1.000         | 2.100       | 0.999         |
| 39   | 494.4     | -0.01       | 0.988         | 0.00        | 0.997         | 0.009       | 0.996         |

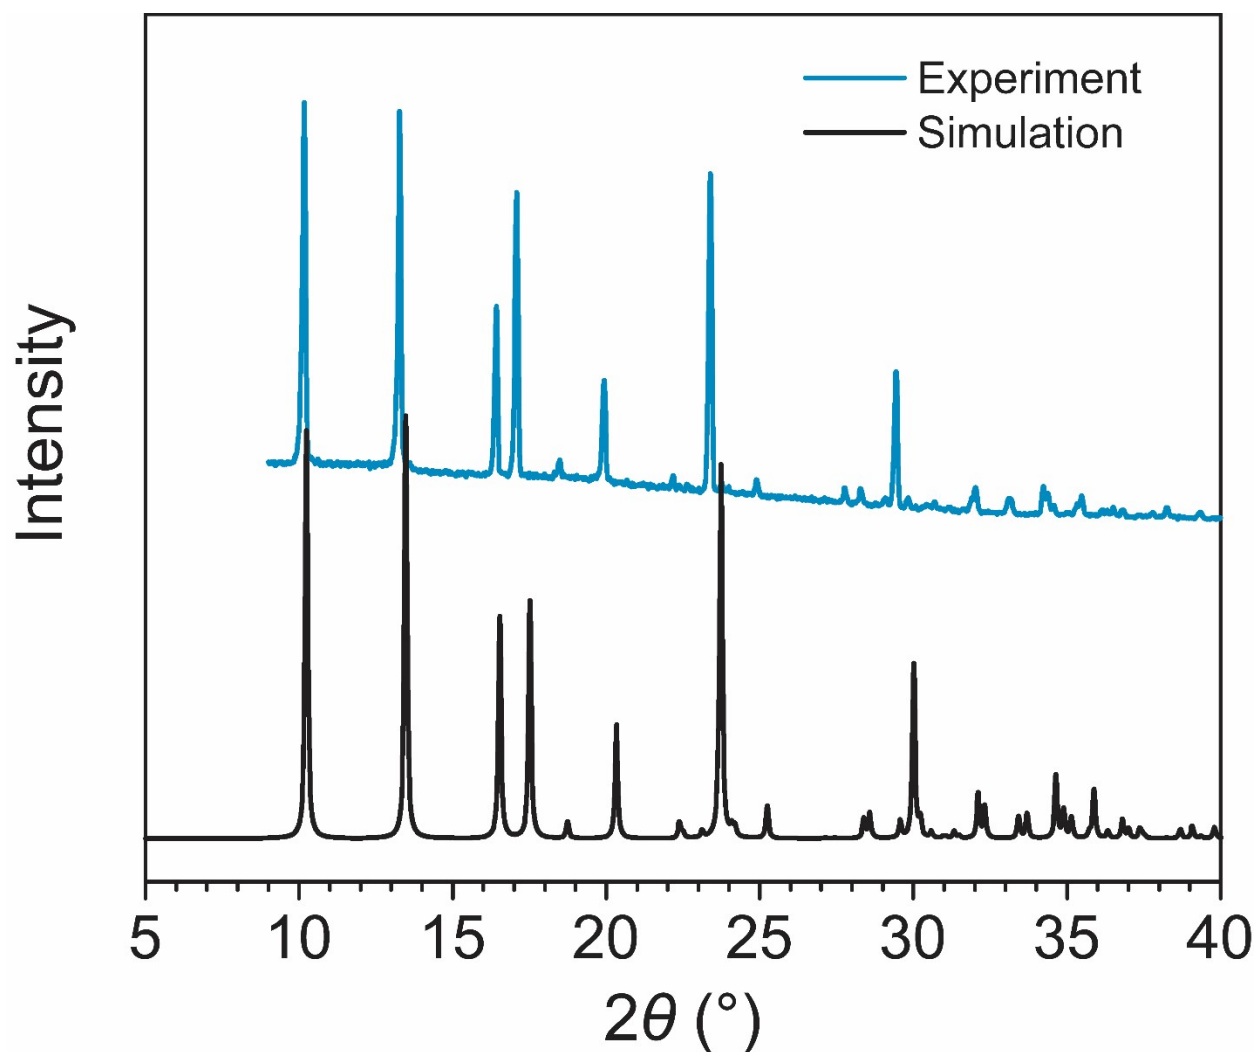

**Figure S5** | PXRD comparison between ground crystals of **1** and the calculated pattern from our obtained crystal structure. The experimental pattern was collected at 298 K, and the simulation is calculated from the single crystal data taken at 100 K. Powder diffraction data were collected with pure CuK $\alpha$  (1.54065 Å) radiation.

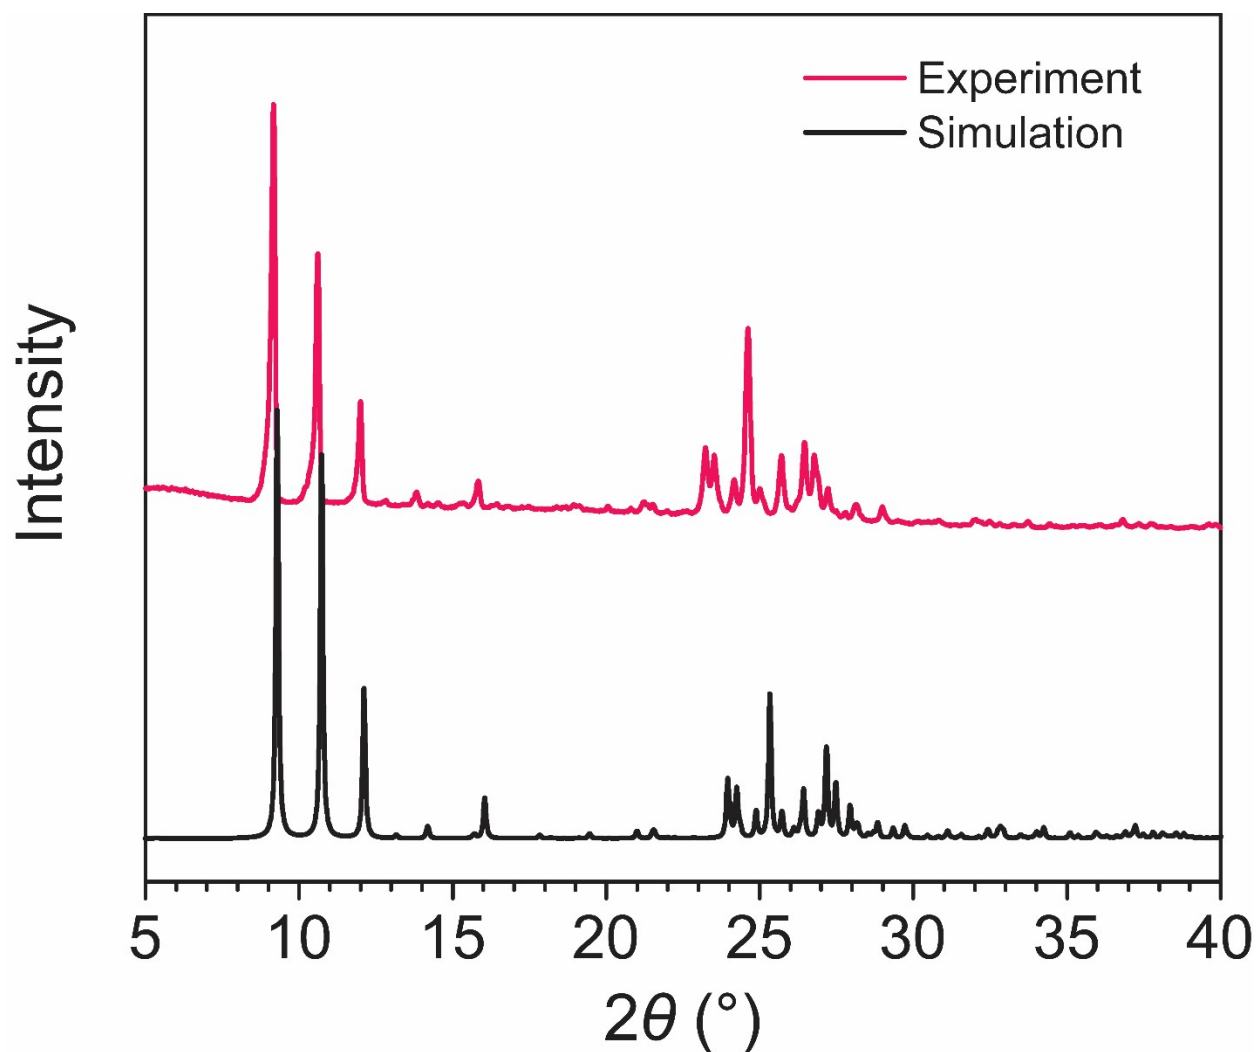

**Figure S6** | PXRD comparison between ground crystals of **2** and the calculated pattern from our obtained crystal structure. The experimental pattern was collected at 298 K, and the simulation is calculated from the single crystal data taken at 100 K. Powder diffraction data were collected with pure CuK $\alpha$  (1.54065 Å) radiation.

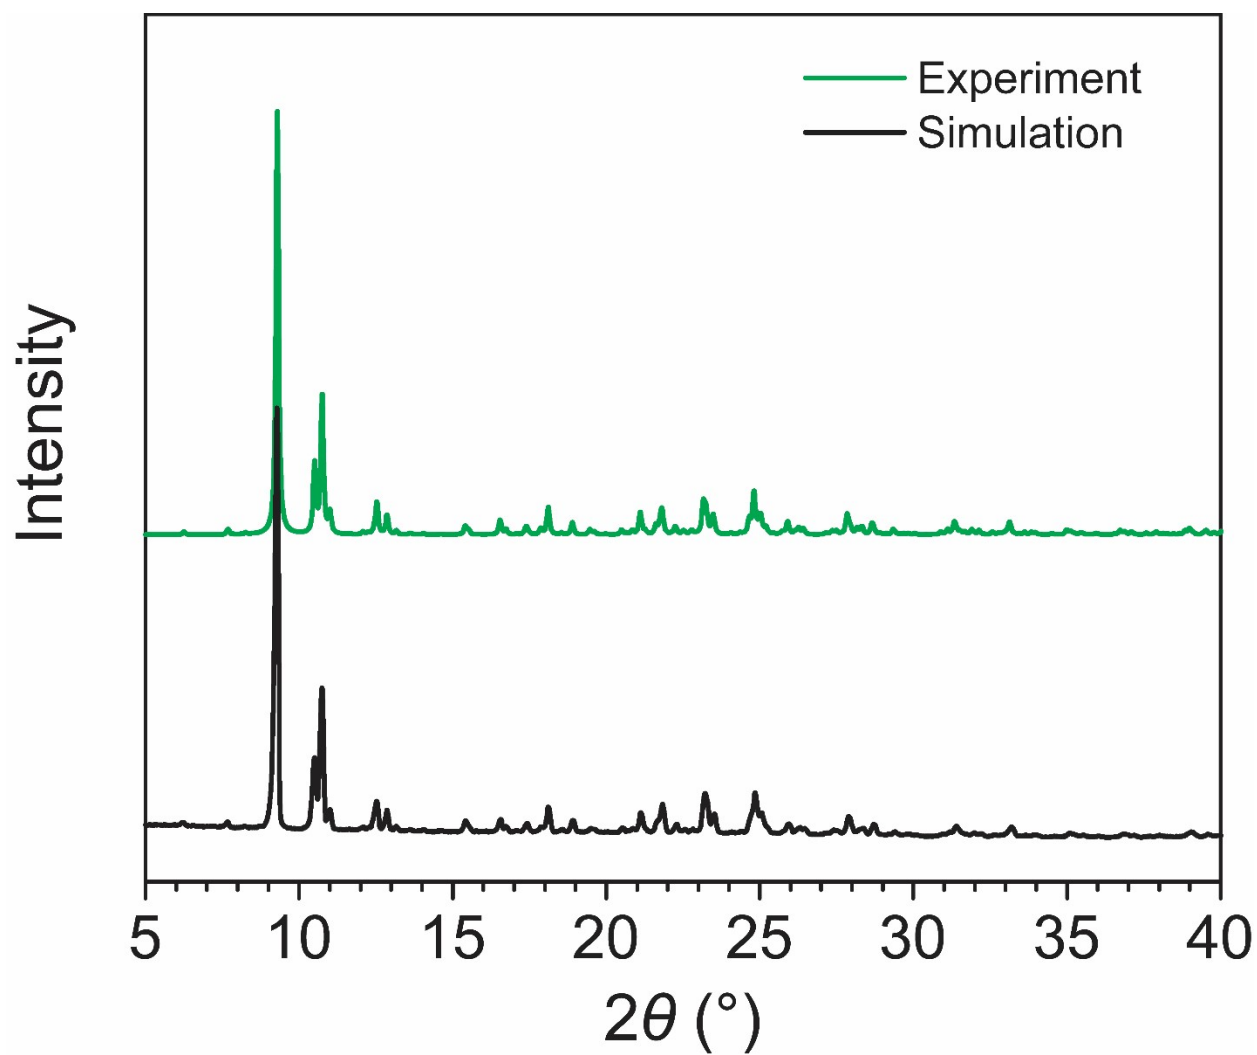

**Figure S7** | PXRD comparison between ground up crystals of **3** with the literature reported structure.<sup>21</sup> Both data sets are at 298 K. Powder diffraction were was collected with pure CuK $\alpha$  (1.54065 Å) radiation.

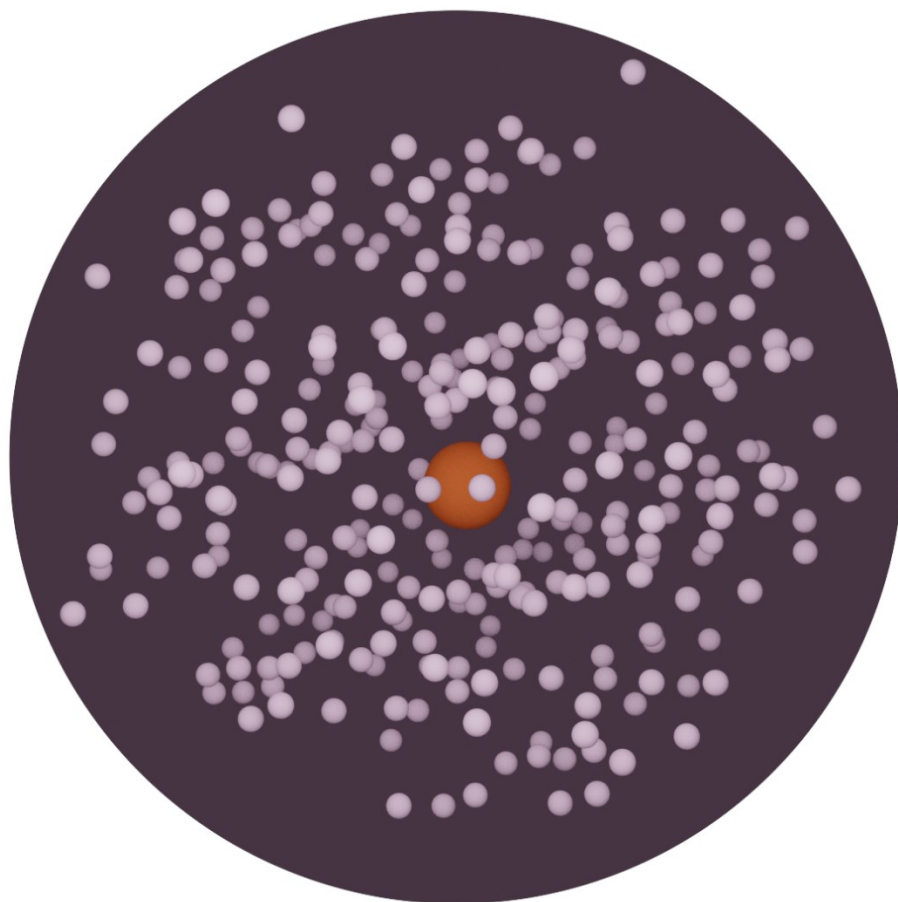

**Figure S8** | A simplified view of the local environment of  $\text{Cu}(\text{Me}_2\text{Nac})_2$  (**1'**) in the solid state. This model shows all hydrogen atoms (white) within a 10 Å distance (represented by the purple sphere) from a copper metal center (orange). We attribute the unexpectedly short  $T_m$  for **1'** to this large proton density of more than 100 hydrogen atoms, many on free-rotating methyl groups.

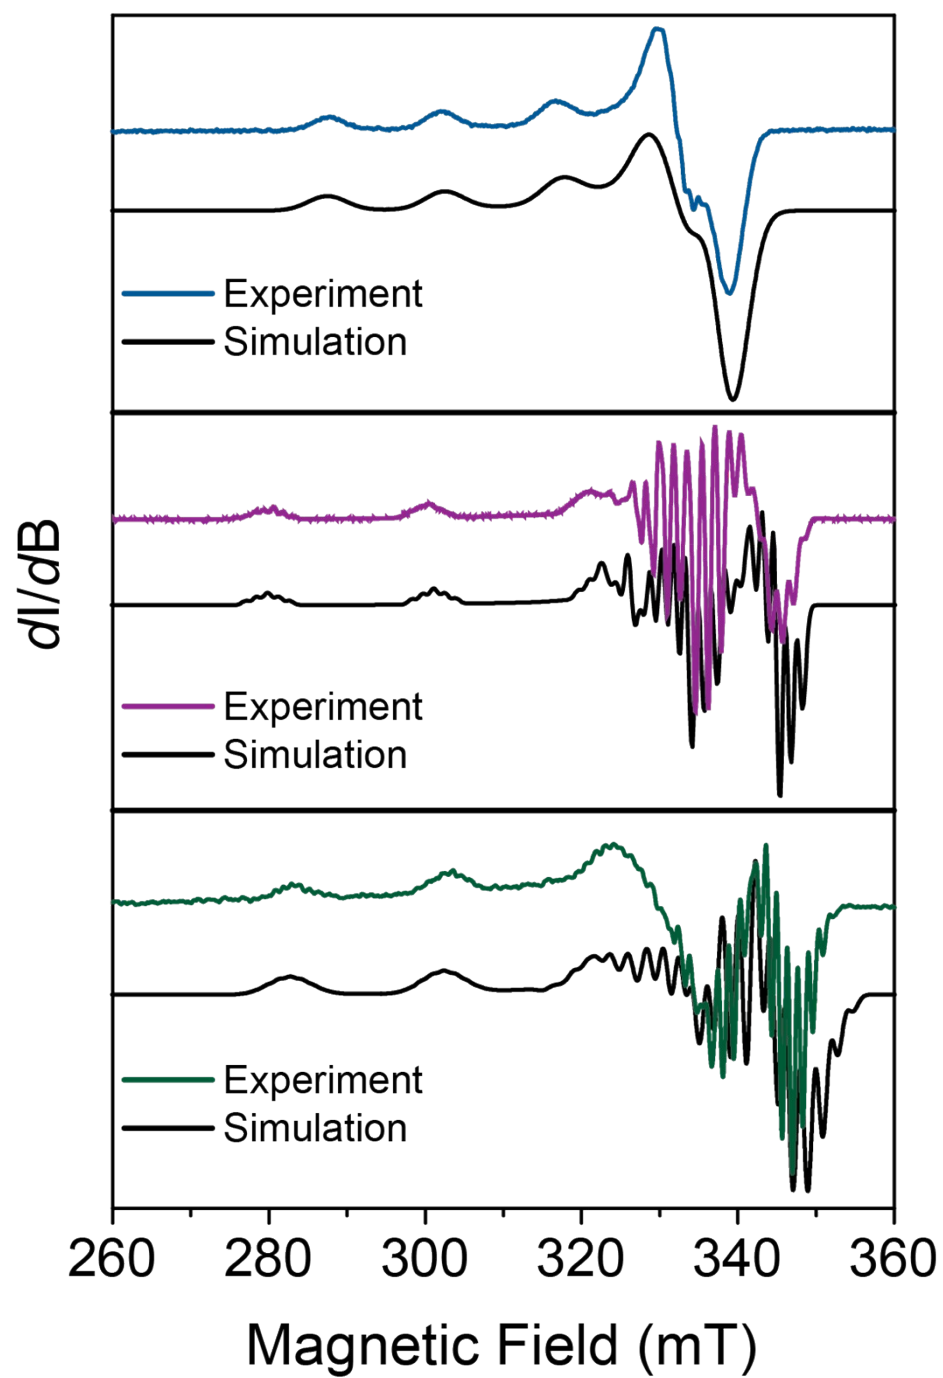

**Figure S9** | CW spectra of **1** (top), **2** (middle), and **3** (bottom) taken in 0.1%<sub>w</sub> OTP at 60 K at X-band (9.540 GHz).

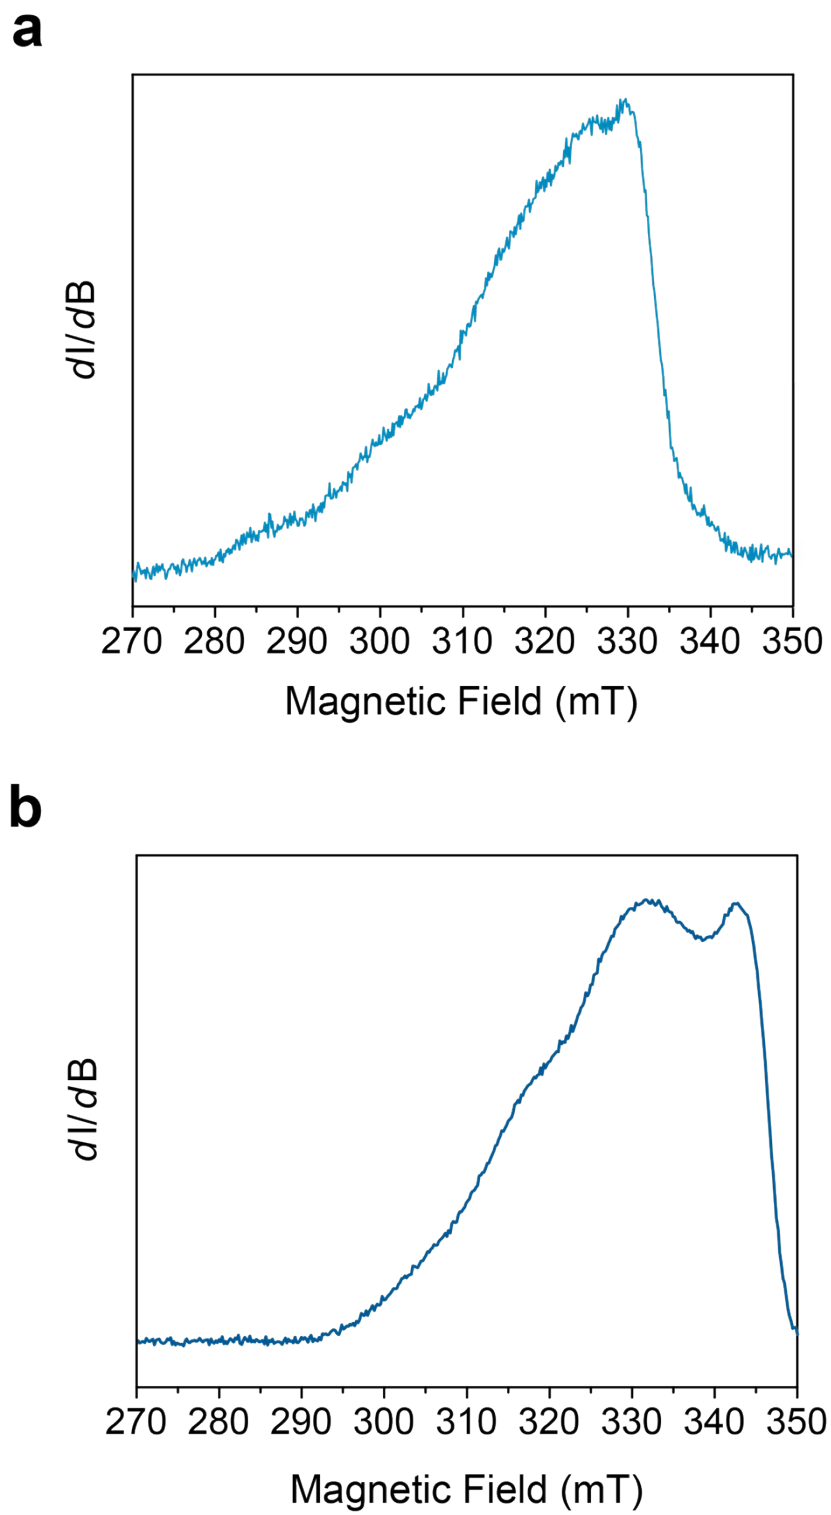

**Figure S10** | Echo-detected field swept spectra for (a) **1'** (9.790 GHz, 5 K) and (b) **1''** (9.384 GHz, 5 K)

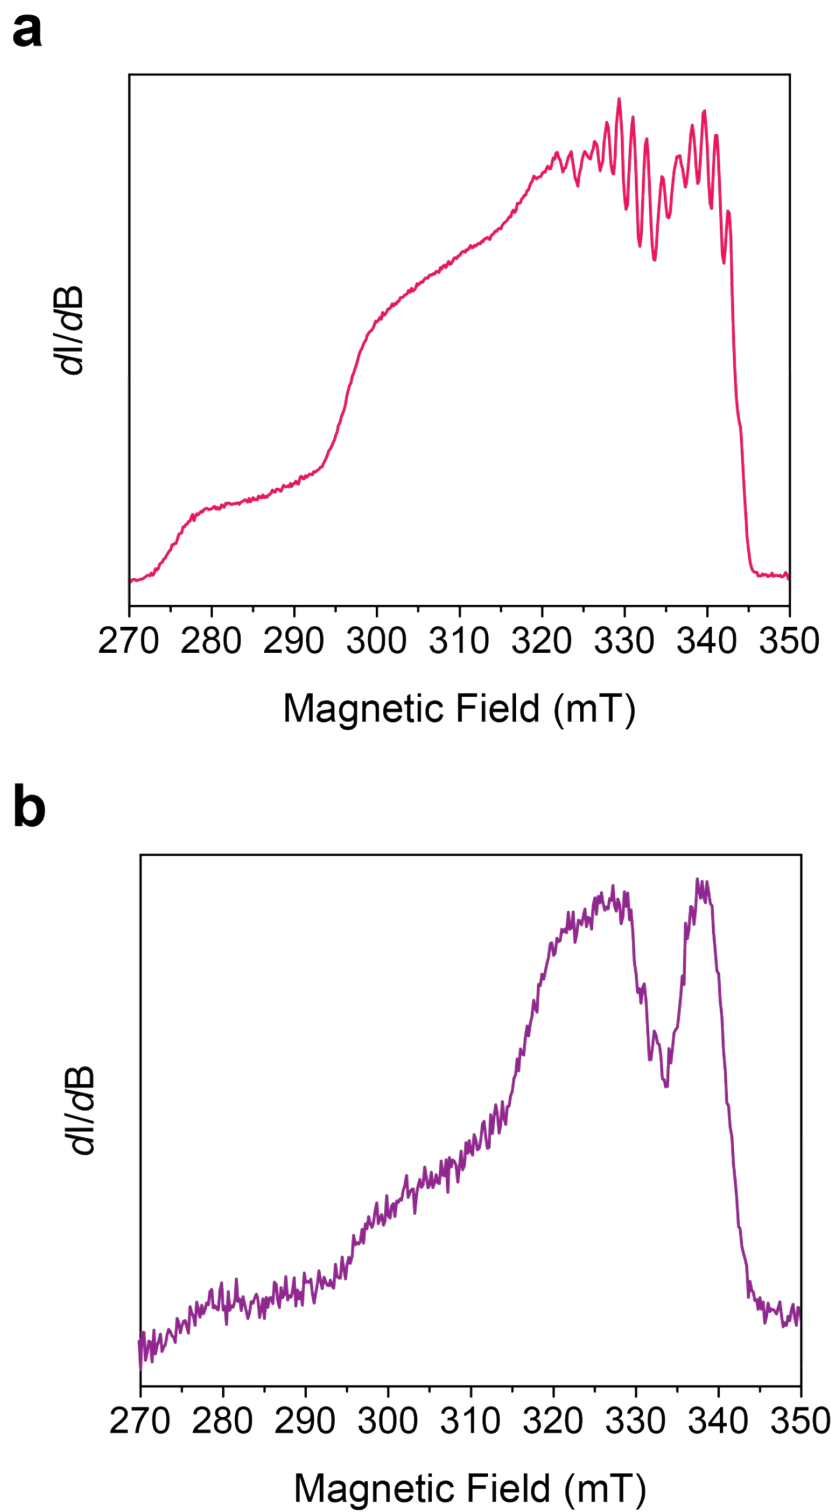

**Figure S11** | Echo-detected field swept spectra for (a) **2'** (9.372 GHz, 5 K) and (b) **2''** (9.387 GHz, 5 K).

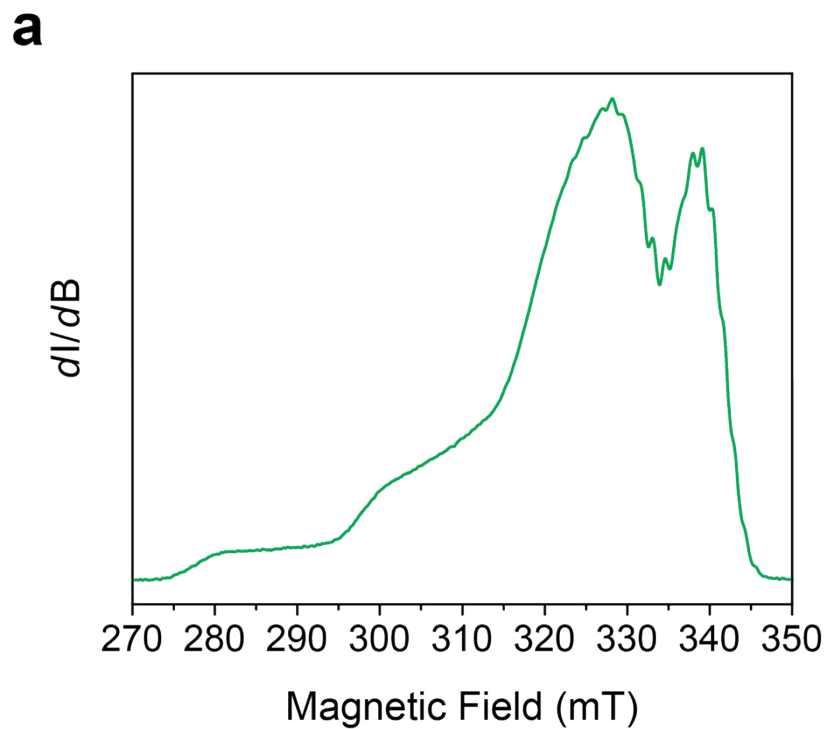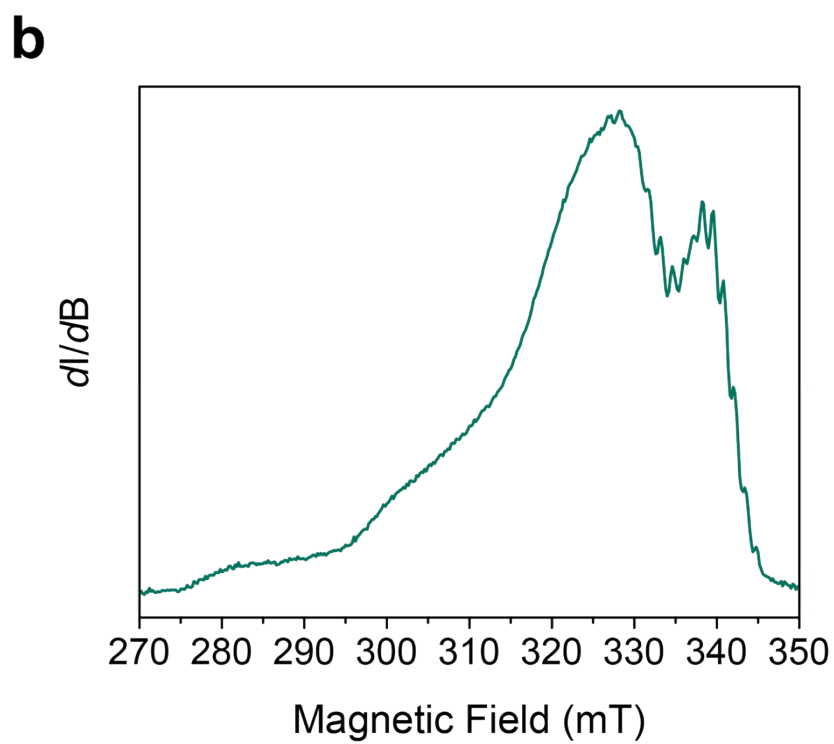

**Figure S12** | Echo-detected field swept spectra for (a) **3'** (9.384 GHz, 5 K) and (b) **3''** (9.377 GHz, 5 K)

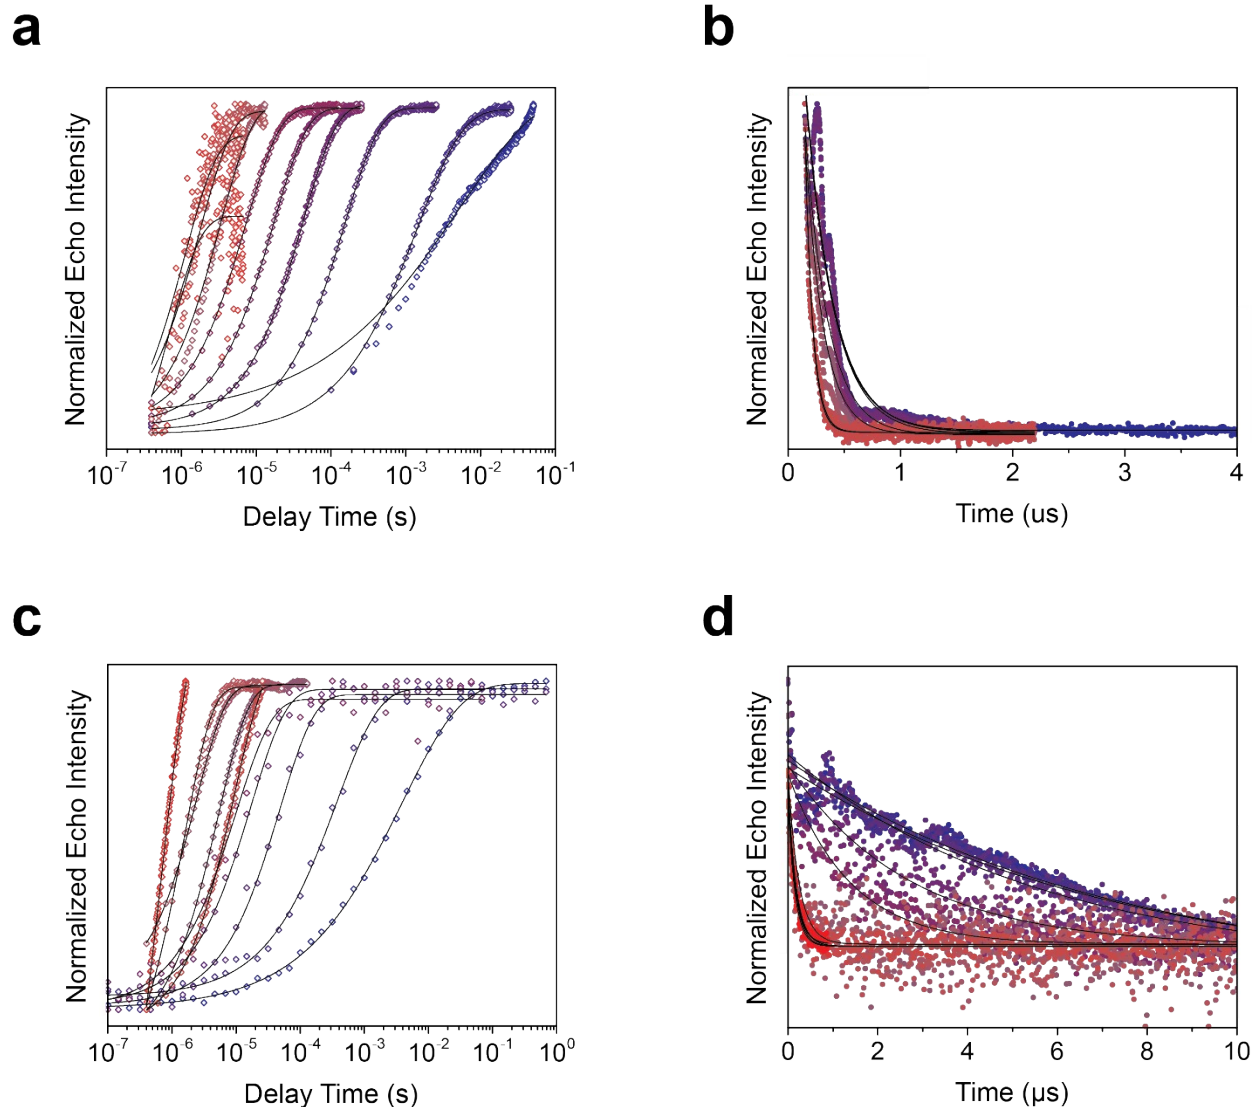

**Figure S13** | Saturation recovery and Hahn echo decay curves for **1** progressing from the lowest temperature measured (blue, 5 K) to the highest (red, 90 K) at X-band (9.790 GHz, 332 mT for **1** and 9.384 GHz, 332 mT). (a) Saturation recovery **1'** (b) Hahn echo decay **1'** (c) Saturation recovery **1''** (d) Hahn echo decay **1''**. The  $T_1$  of **1'** was collected with linear spacing, unlike the logarithmic spacing used for the other complexes. The larger error in fitting the tail has a minor effect on  $T_1$ , as the linear detection means that region of the curve is fit to only a small handful of data points – only the six shortest time points are poorly fit.

**a**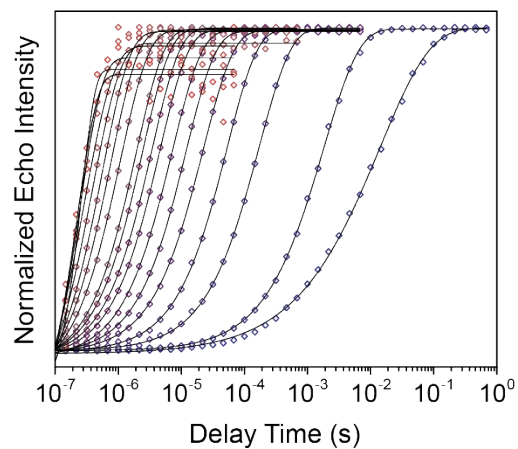**b**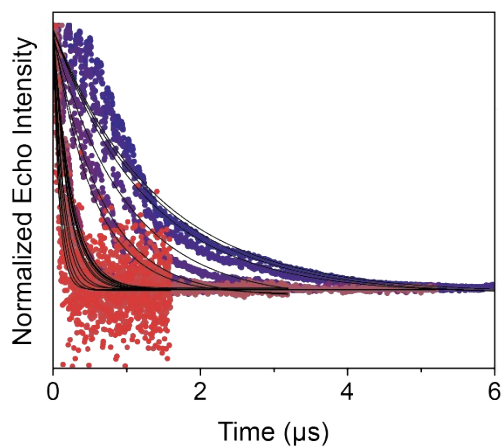**c**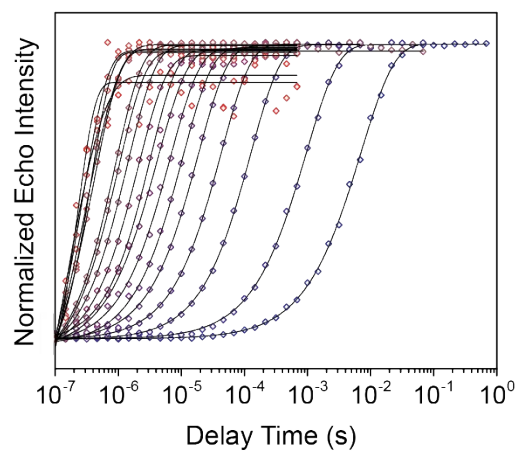**d**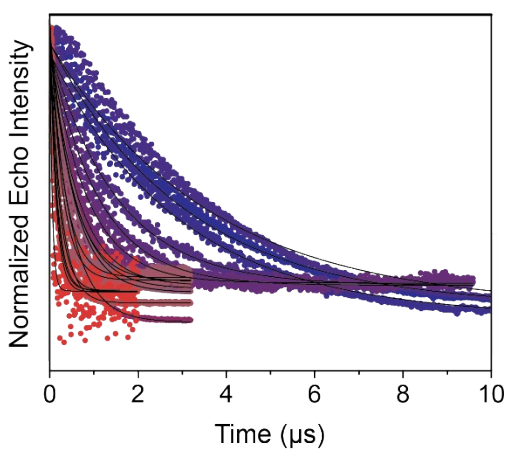

**Figure S14** | Saturation recovery and Hahn echo decay curves for **2** progressing from the lowest temperature measured (blue, 5 K) to the highest (red, 260 K) at X-band (9.372 GHz, 329.2 mT for **2'** and 9.387 GHz, 337.0 mT for **2''**). (a) Saturation recovery **2'** (b) Hahn echo decay **2'** (c) Saturation recovery **2''** (d) Hahn echo decay **2''**.

**a**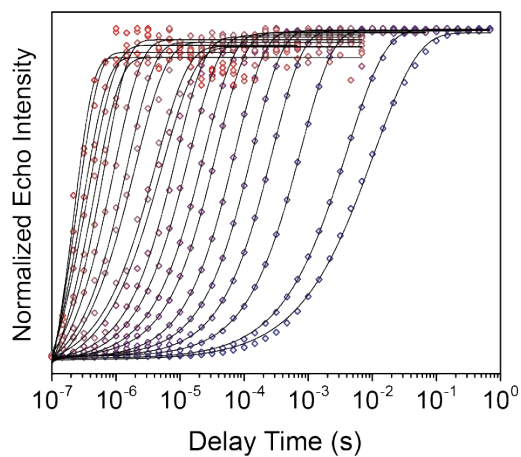**b**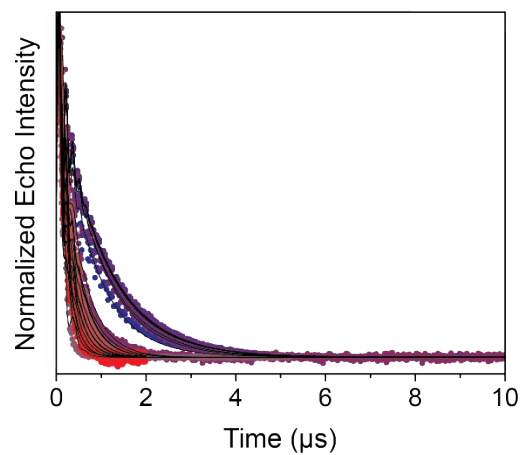**c**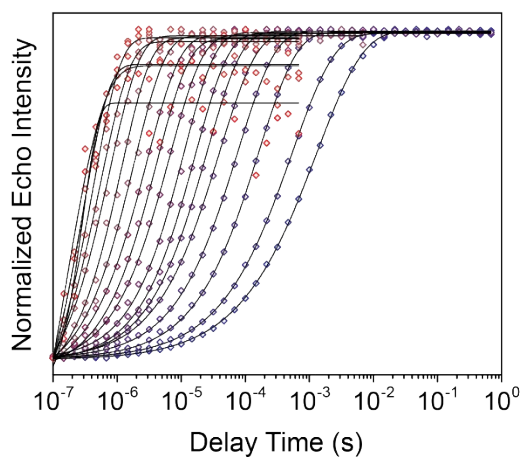**d**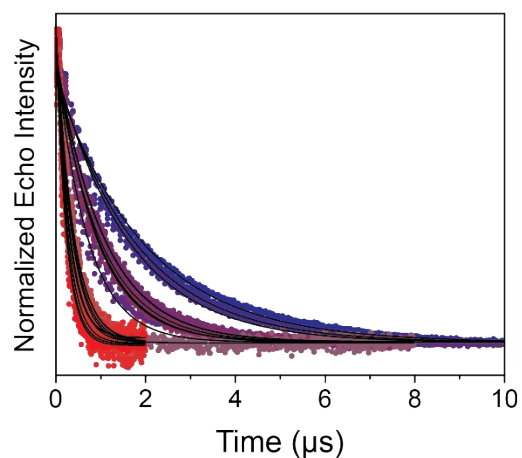

**Figure S15** | Saturation recovery and Hahn echo decay curves for **3** progressing from the lowest temperature measured (blue, 5 K) to the highest (red, 300 K) at X-band (9.384 GHz, 328 mT for **3'** and 9.377 GHz and 328 mT for **3''**). (a) Saturation recovery **3'** (b) Hahn echo decay **3'** (c) Saturation recovery **3''** (d) Hahn echo decay **3''**.

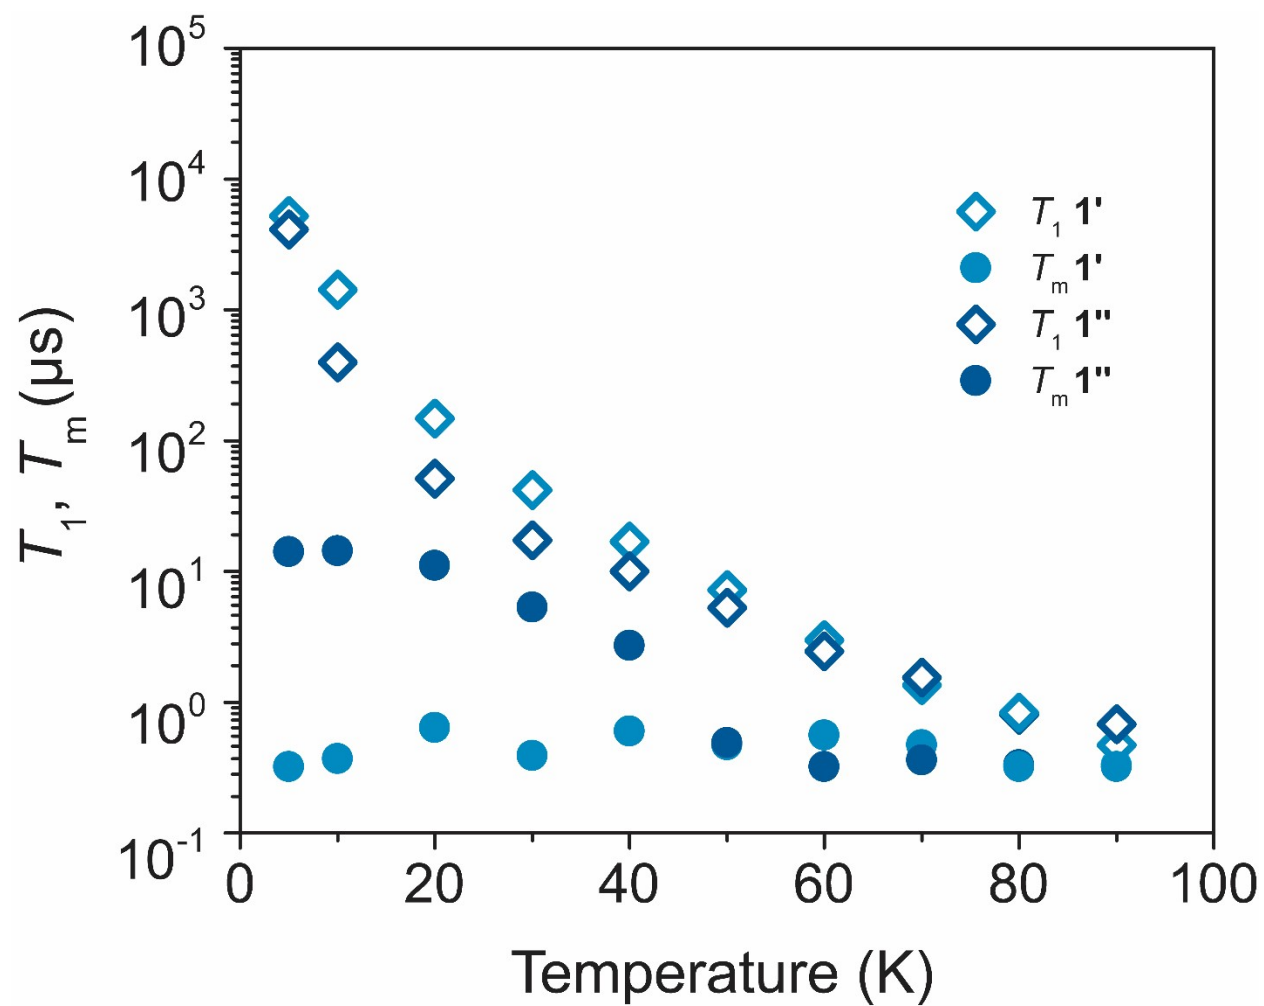

**Figure S16** |  $T_1$  and  $T_m$  vs temperature for **1'** and **1''** at X-band (9.790 GHz, 332 mT for **1** and 9.384 GHz, 332 mT).

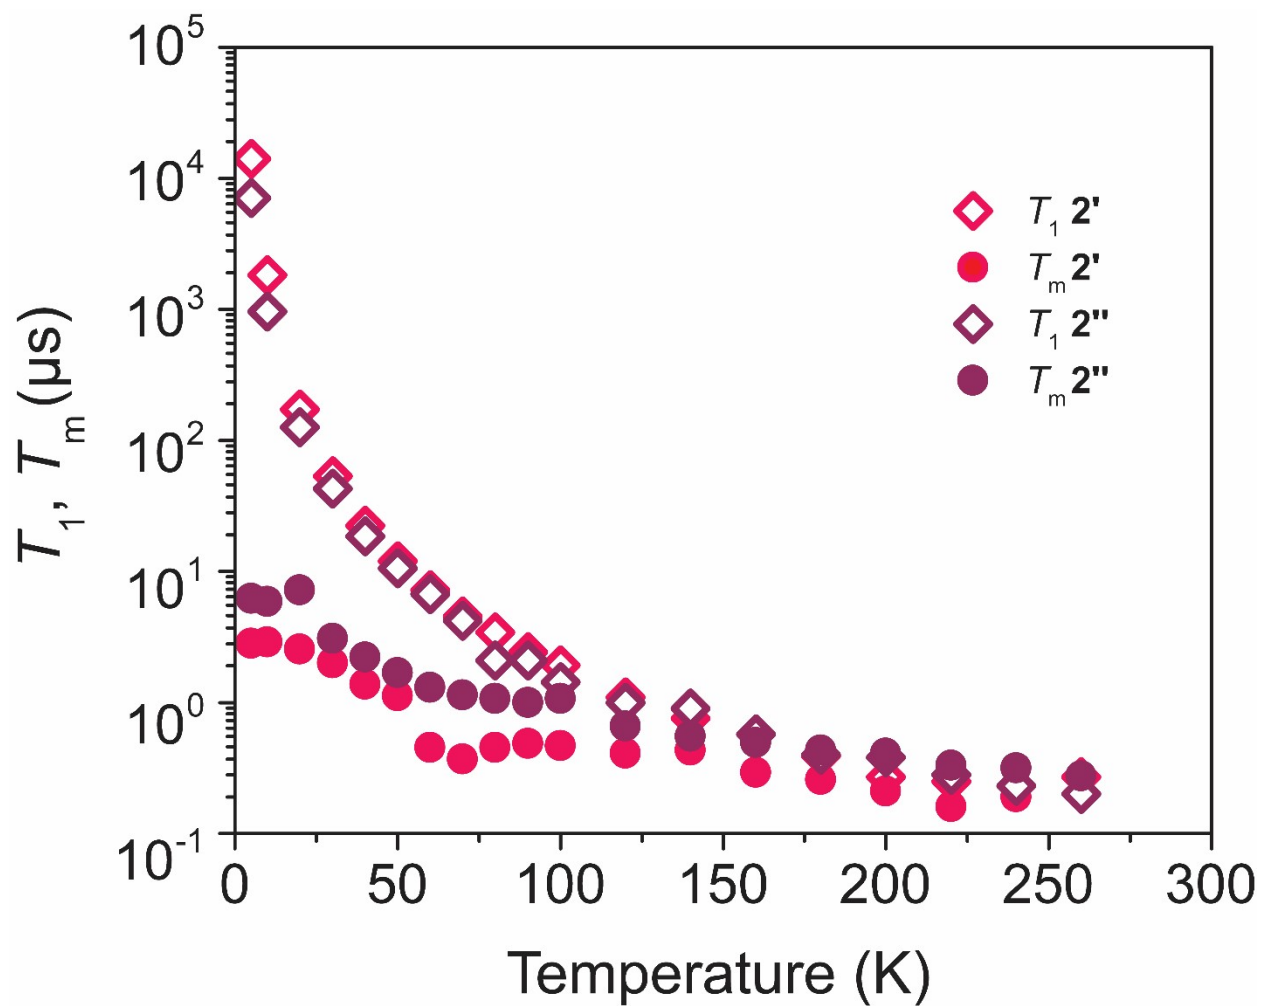

**Figure S17** |  $T_1$  and  $T_m$  vs temperature for **2'** and **2''** at X-band (9.372 GHz, 329.2 mT for **2'** and 9.387 GHz, 337.0 mT for **2''**).

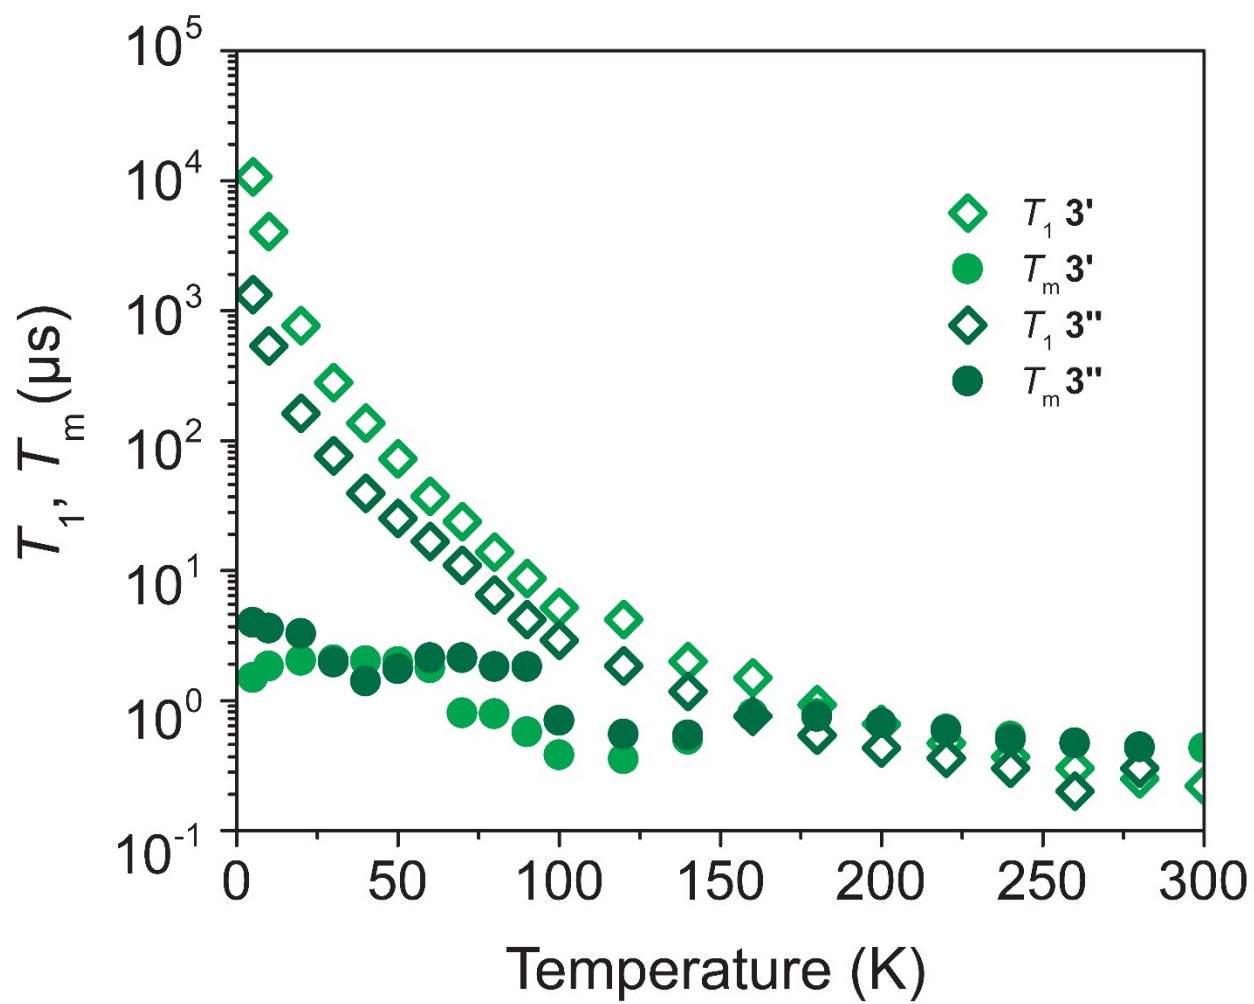

**Figure S18** |  $T_1$  and  $T_m$  vs temperature for 3' and 3'' at X-band (9.384 GHz, 328 mT for 3' and 9.377 GHz and 328 mT for 3'').

**a**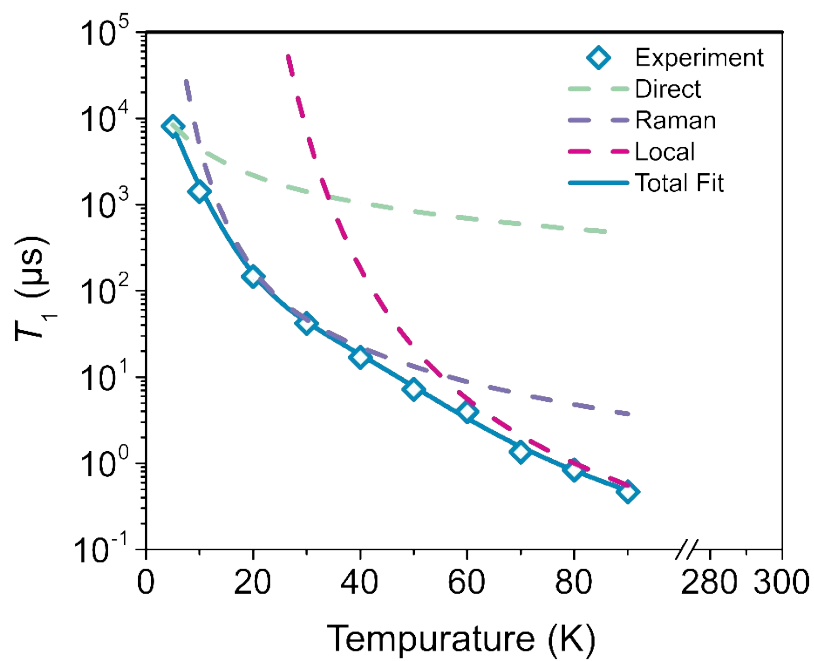**b**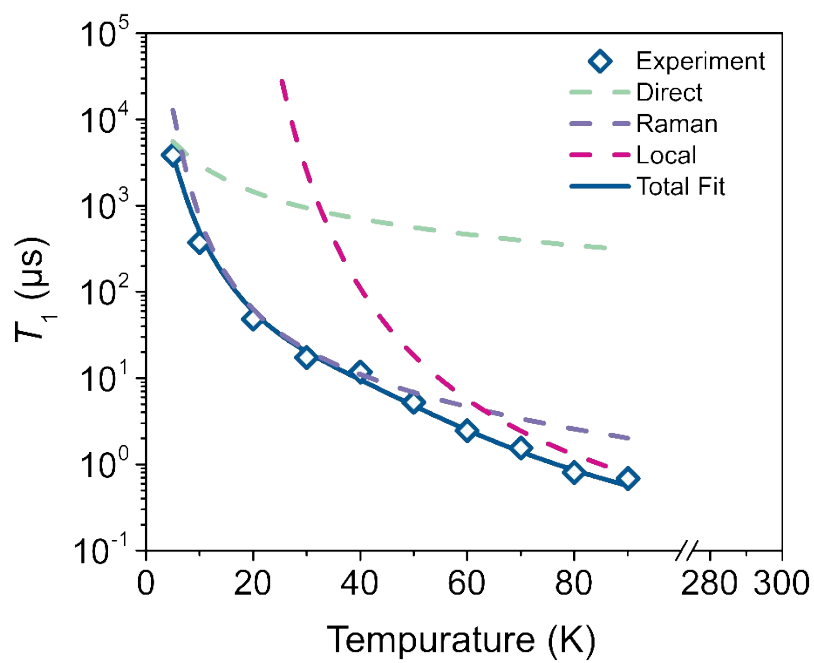

**Figure S19** | Fits of the  $T_1$  data for **1'** (a) and **1''** (b) using the Debye model. Data were taken at X-band (9.790 GHz, 332 mT for **1** and 9.384 GHz, 332 mT).

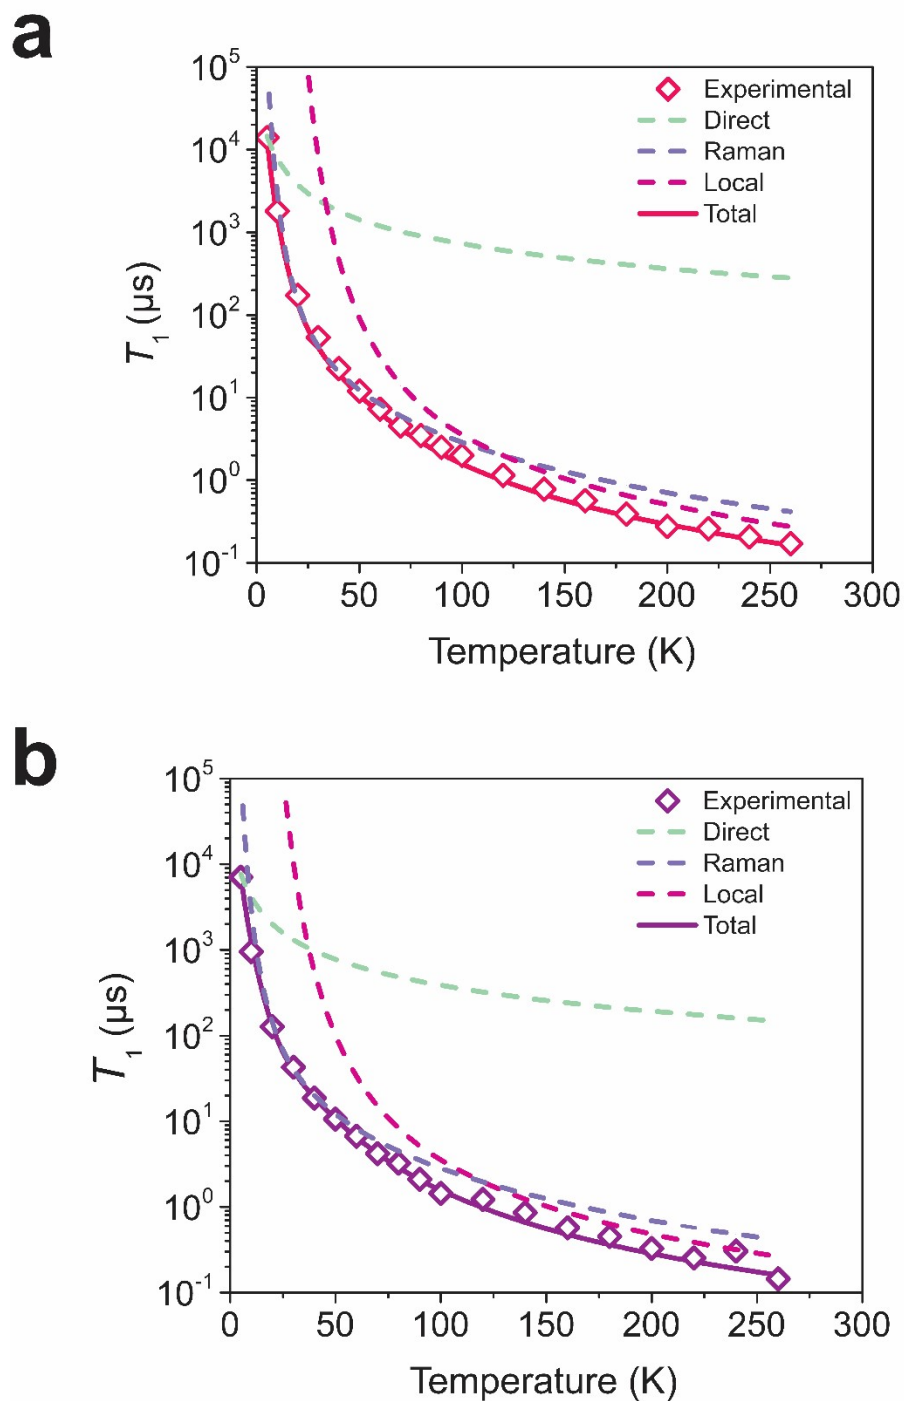

**Figure S20** | Fits of the  $T_1$  data for **2'** (**a**) and **2''** (**b**) using the Debye model. Data were taken at X-band (9.372 GHz, 329.2 mT for **2'** and 9.387 GHz, 337.0 mT for **2''**).

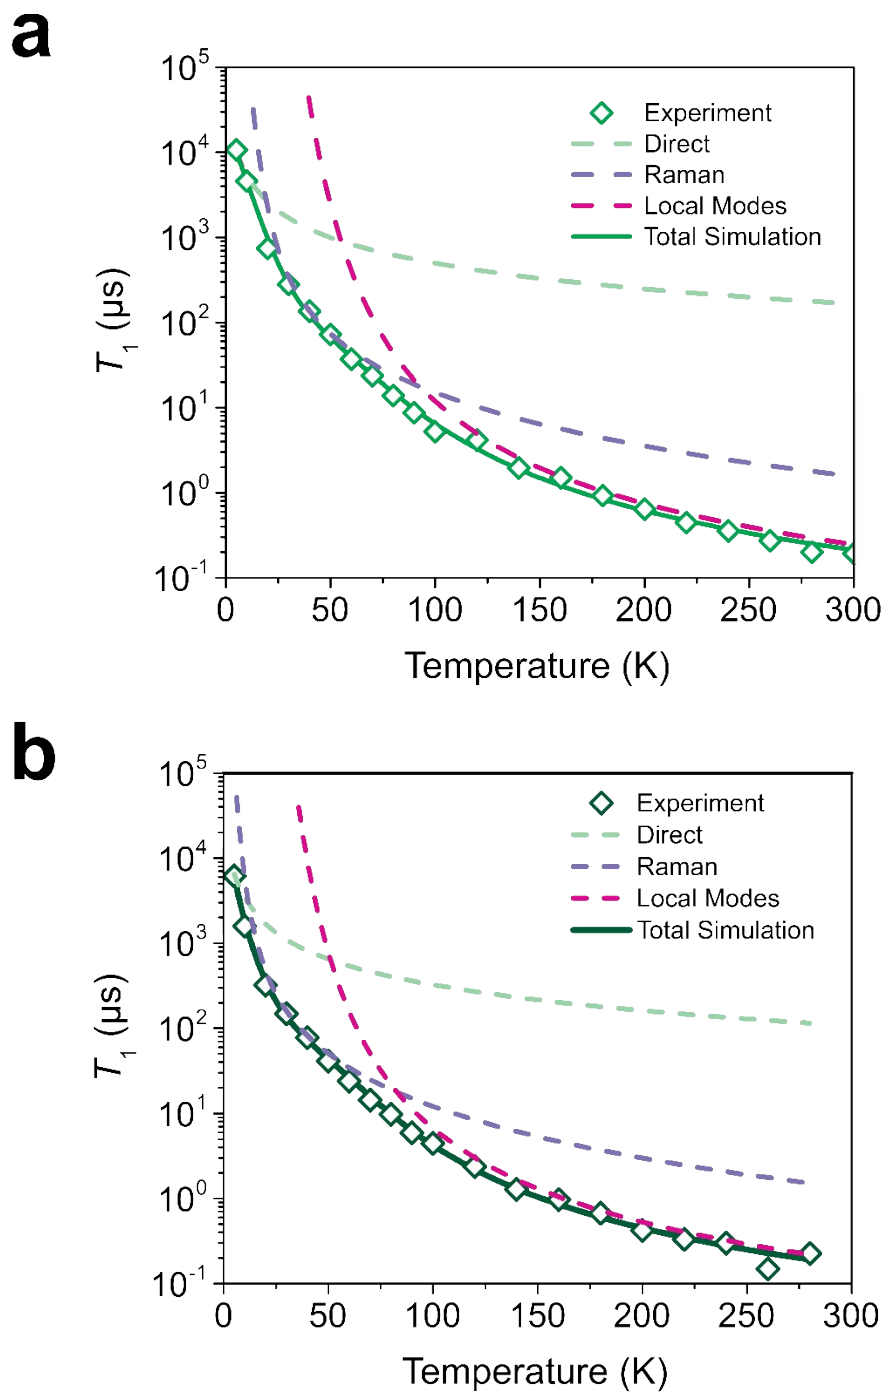

**Figure S21** | Fits of the  $T_1$  data for **3'** (a) and **3''** (b) using the Debye model. Data were acquired at X-band (9.384 GHz, 328 mT for **3'** and 9.377 GHz and 328 mT for **3''**).

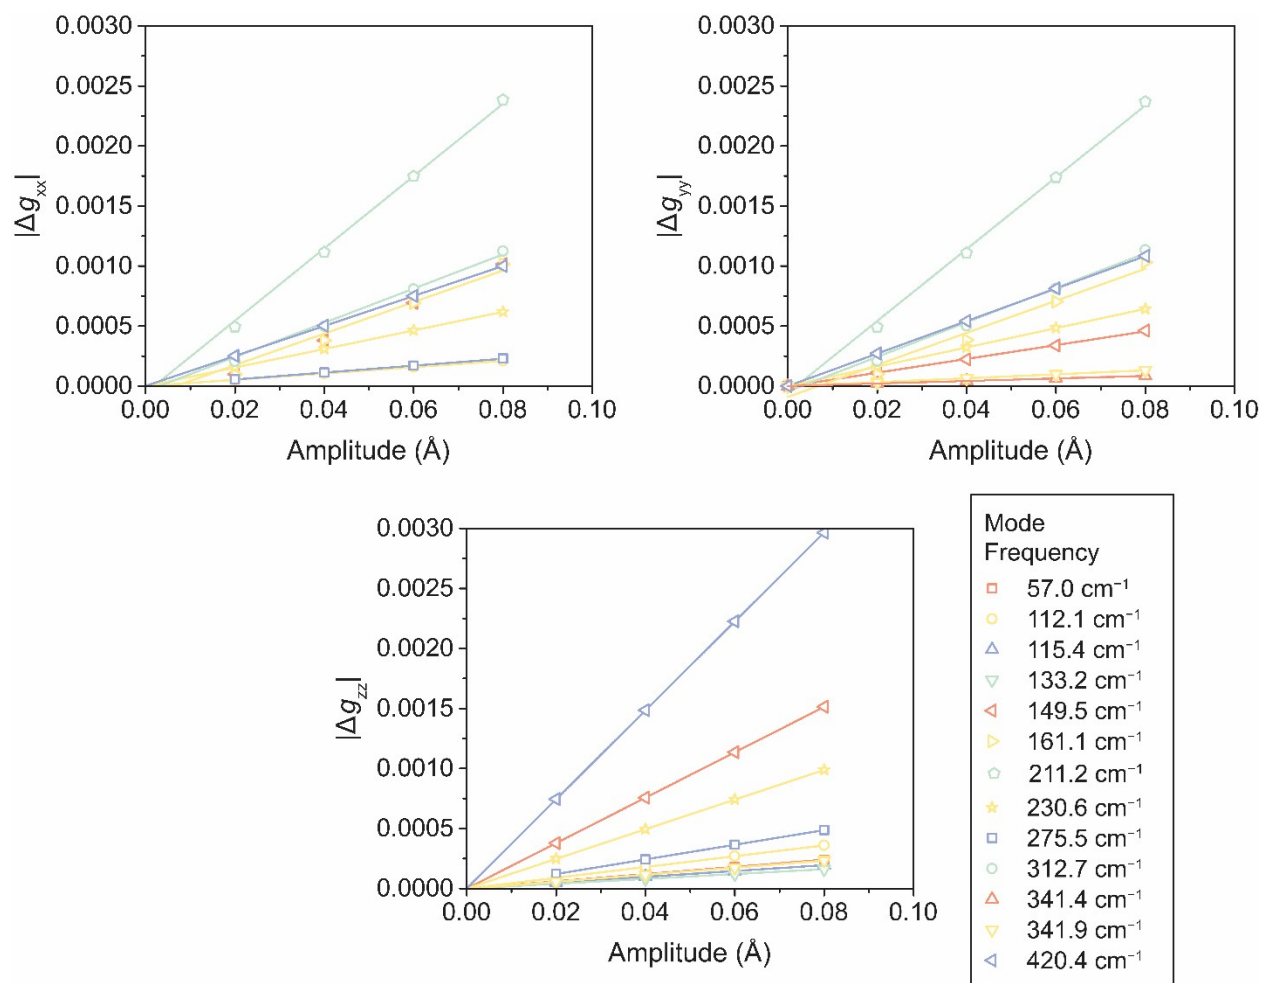

**Figure S22** | The absolute value of the change in the x, y, and z components of the g-tensor from the ground state calculated for distorted structures corresponding to strongly coupled vibrational modes for **1**. Displacement vectors and g-tensor values are only shown for the eight most strongly coupled modes for each component of the g tensor.

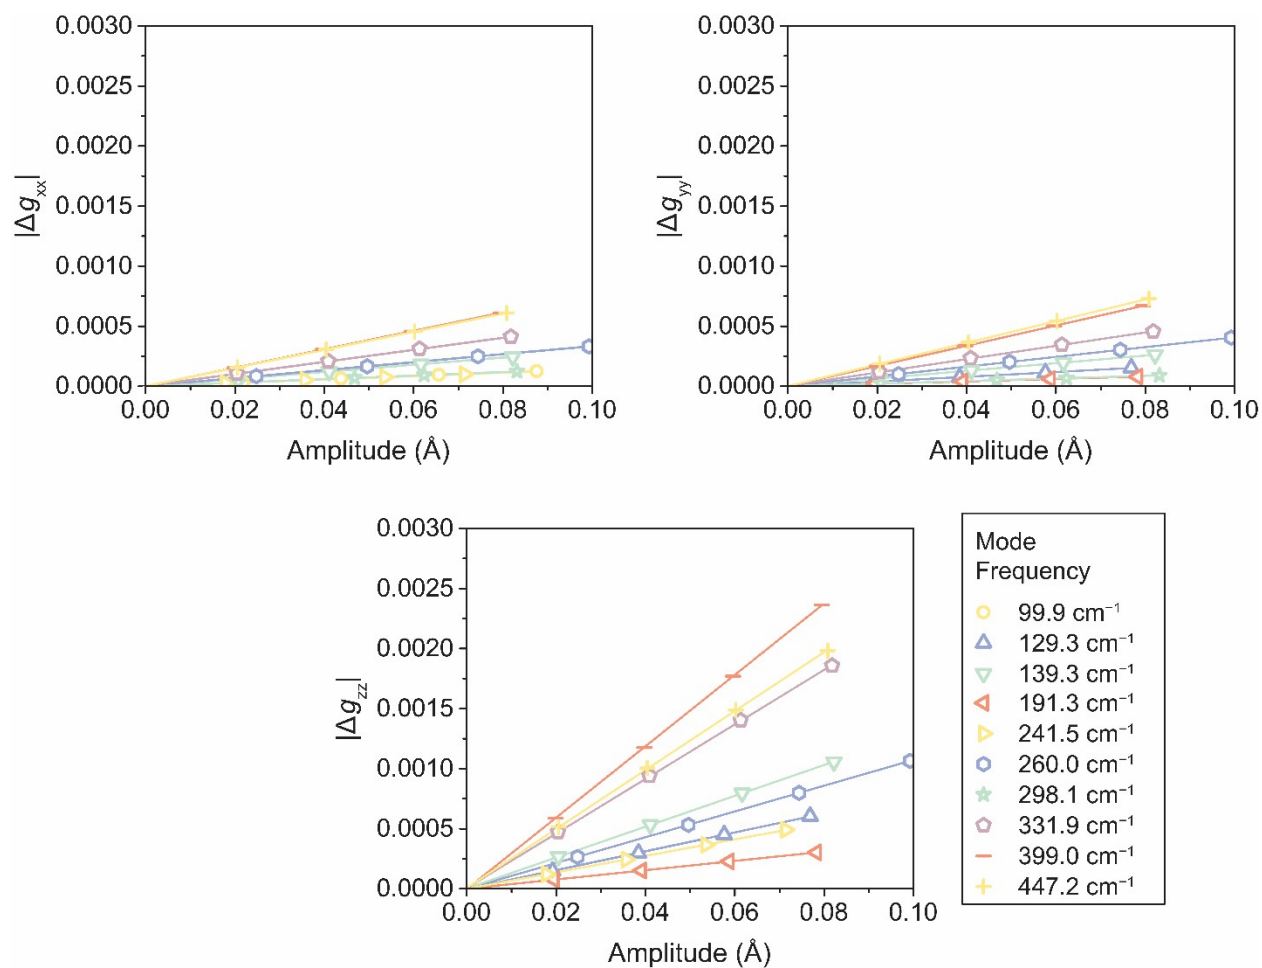

**Figure S23** | The absolute value of the change in the x, y, and z components of the g-tensor from the ground state calculated for distorted structures corresponding to strongly coupled vibrational modes for **2**. Displacement vectors and g-tensor values are only shown for the eight most strongly coupled modes for each component of the g tensor.

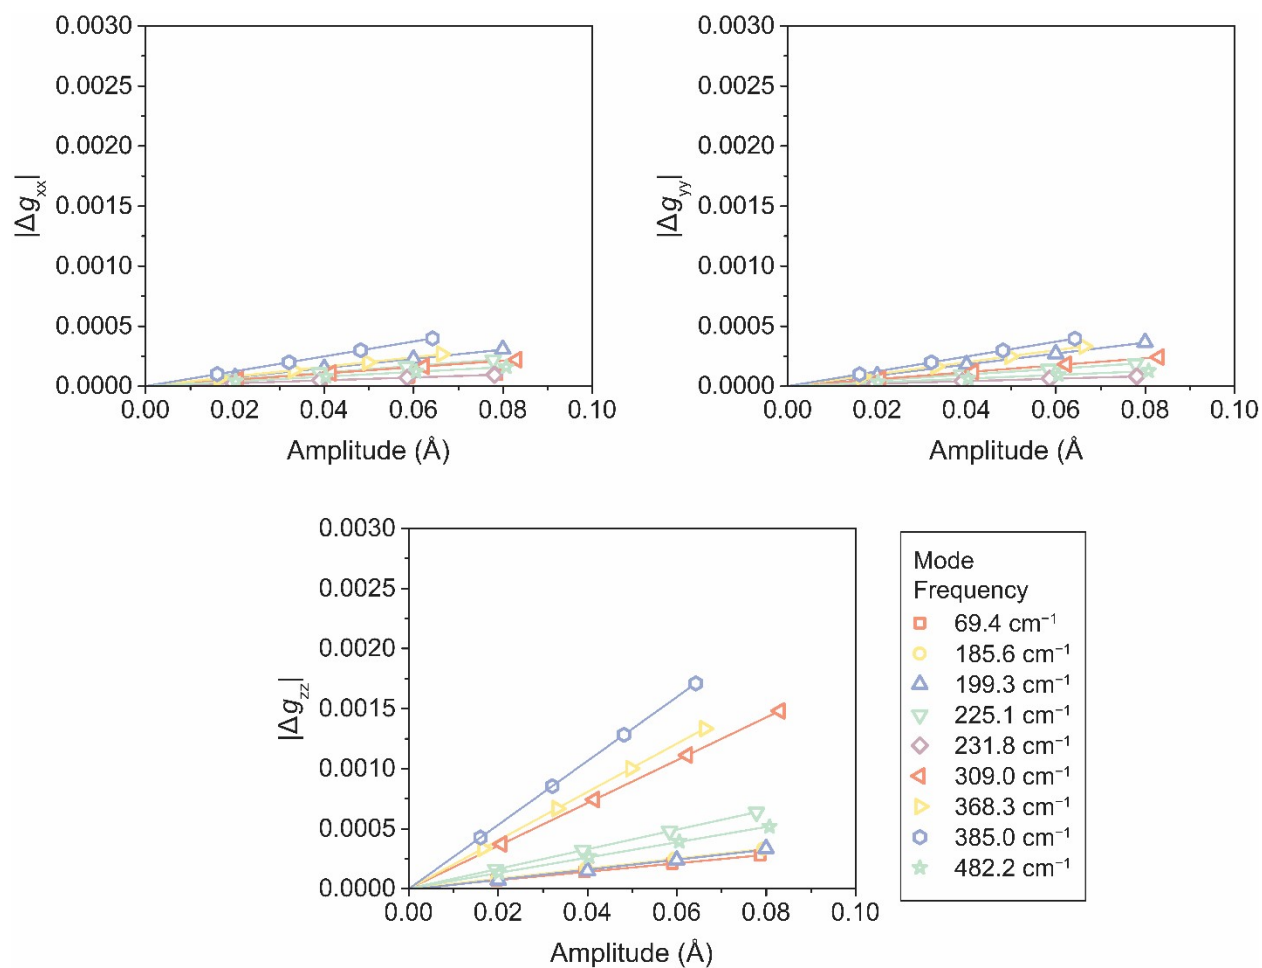

**Figure S24** | The absolute value of the change in the x, y, and z components of the g-tensor from the ground state calculated for distorted structures corresponding to strongly coupled vibrational modes for **3**. Displacement vectors and g-tensor values are only shown for values are only shown for the eight most strongly coupled modes with significant changes in g-tensor ( $\frac{\partial g}{\partial Q} > 0.001 \text{ Å}^{-1}$ ), except for along  $g_{yy}$ , where only seven modes had  $\frac{\partial g}{\partial Q} > 0.001 \text{ Å}^{-1}$ .

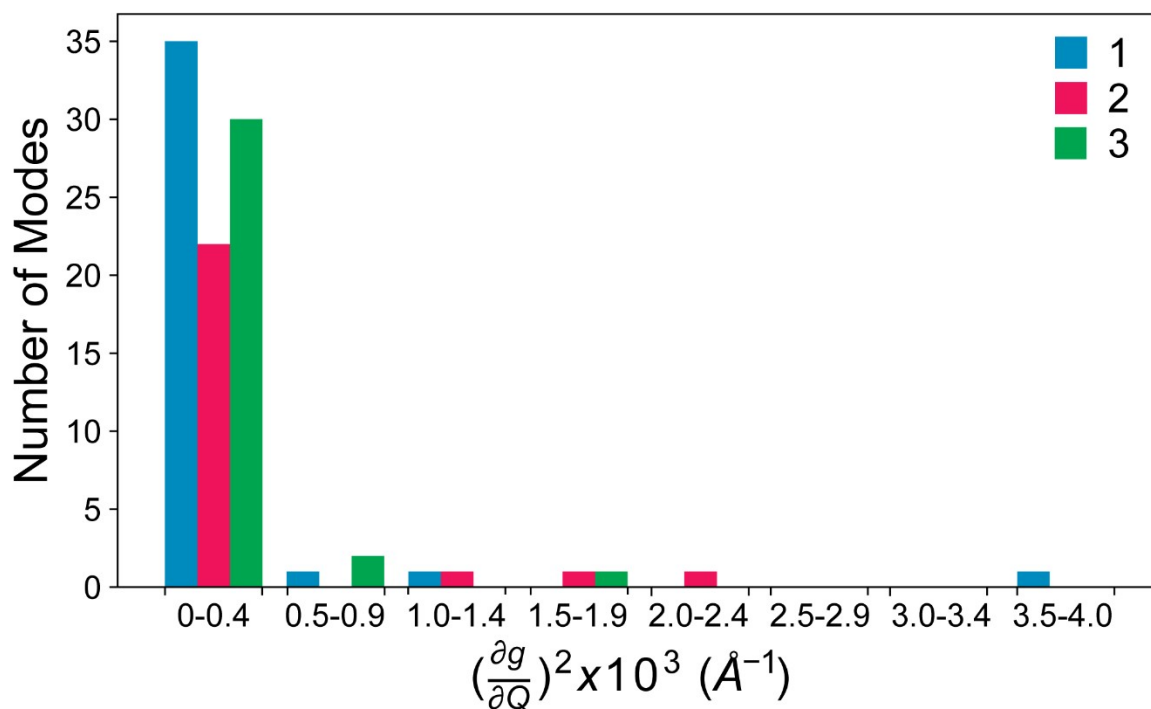

**Figure S25** | Histograms showing the SPC of all local modes between 0 and 500 cm<sup>-1</sup> in **1**, **2**, and **3**. The vast majority of local modes are weakly coupled ( $(\frac{\partial g}{\partial Q})^2 < 0.0001 \text{ Å}^{-1}$ ). A small number of modes in each complex have significantly stronger coupling, and drive rapid relaxation in these complexes.

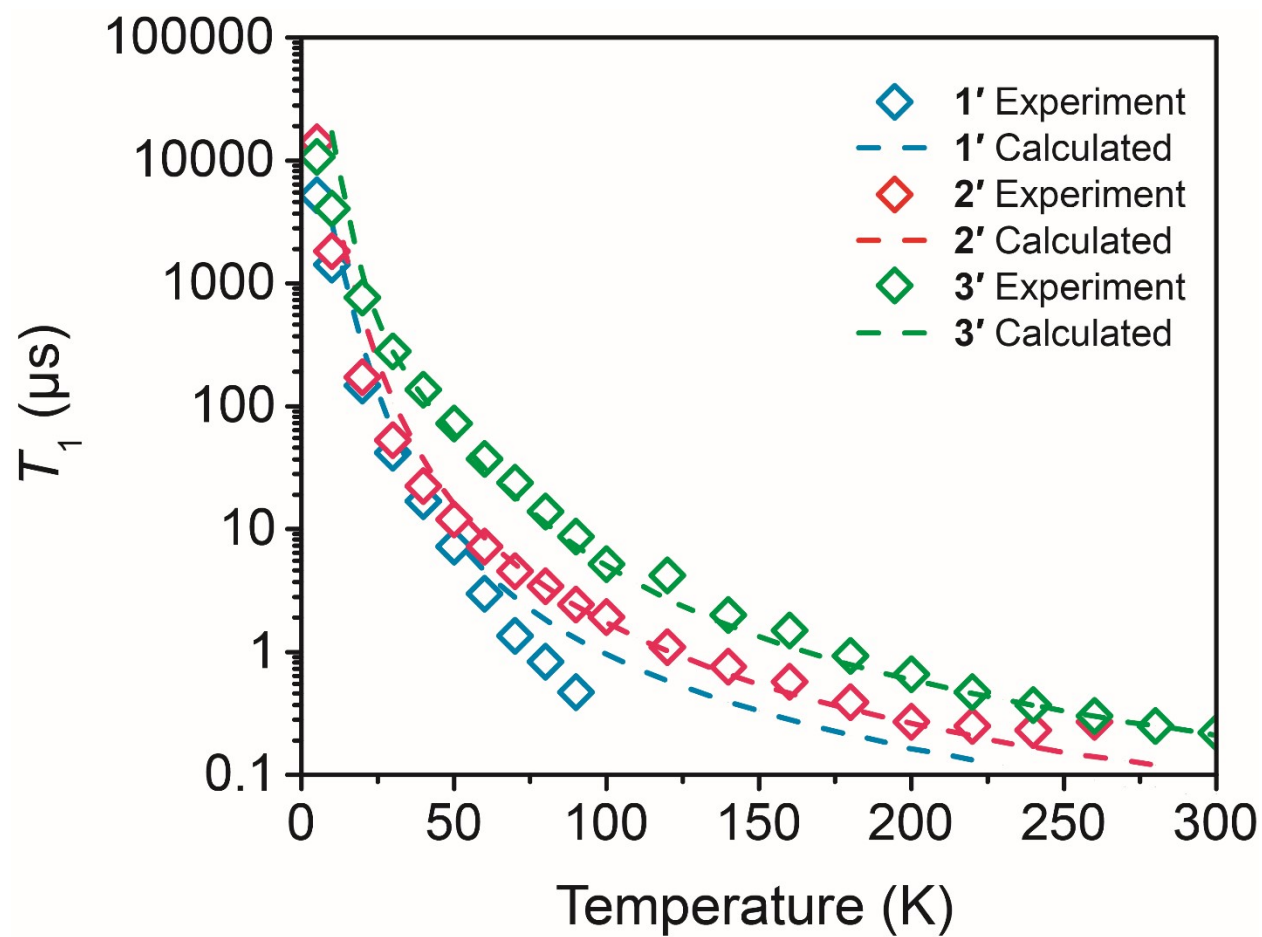

**Figure S26** | Comparison of experimental  $T_1$  values with calculated  $T_1$  values from **Eq 6** for **1'–3'**. The calculated values match the experimental values well at high temperatures, but tend to deviate at lower temperatures where unmodeled lattice vibrations dominate.

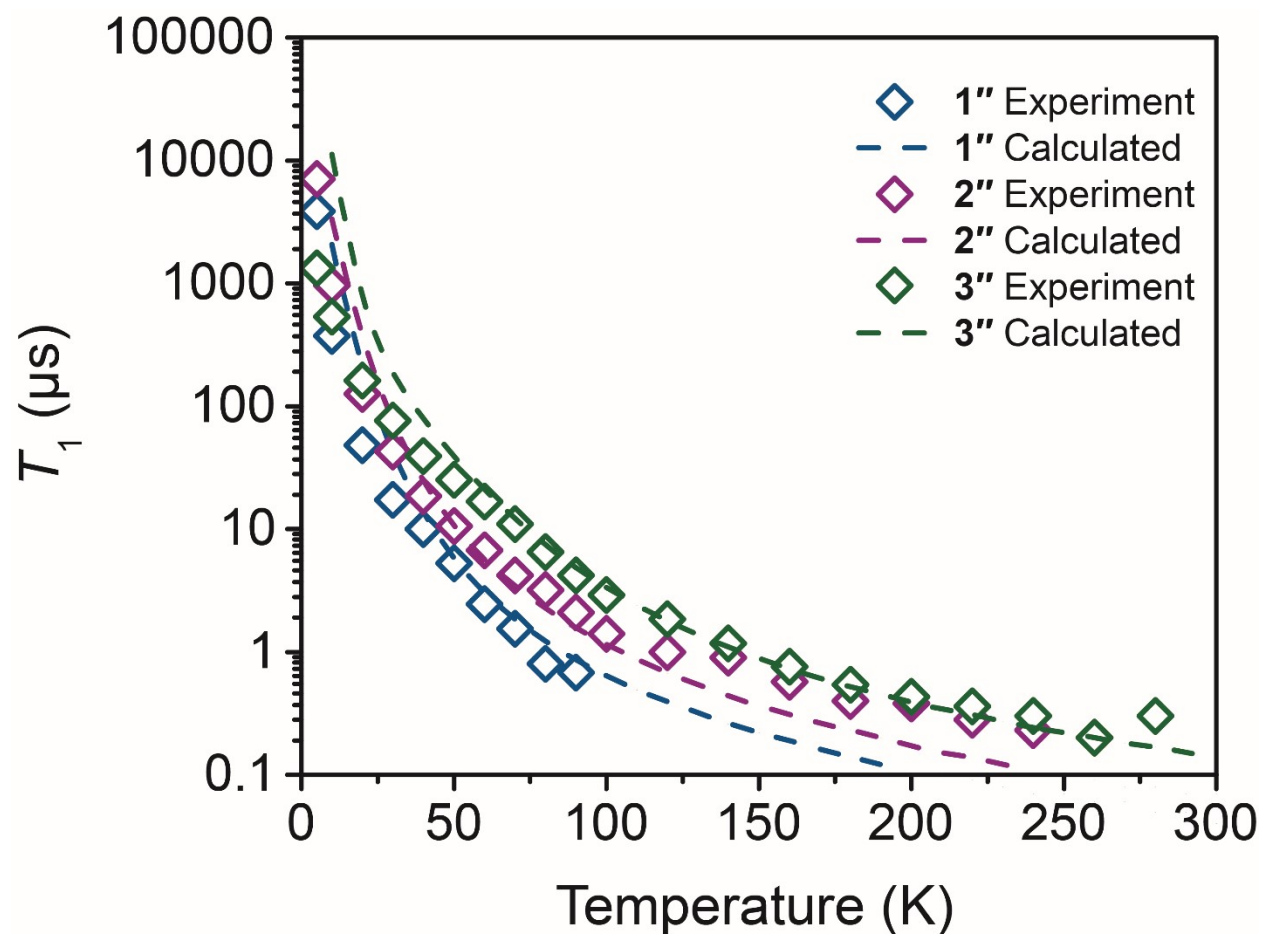

**Figure S27** | Comparison of experimental  $T_1$  values with calculated  $T_1$  values from Eq 6 for 1''–3''. The calculated values match the experimental values well at high temperatures, but tend to deviate at lower temperatures where unmodeled lattice vibrations dominate. Additionally, these calculated values seem to deviate more from experiment than 1'–3', likely as a result of the complexity of phonon interactions in solution.

**a**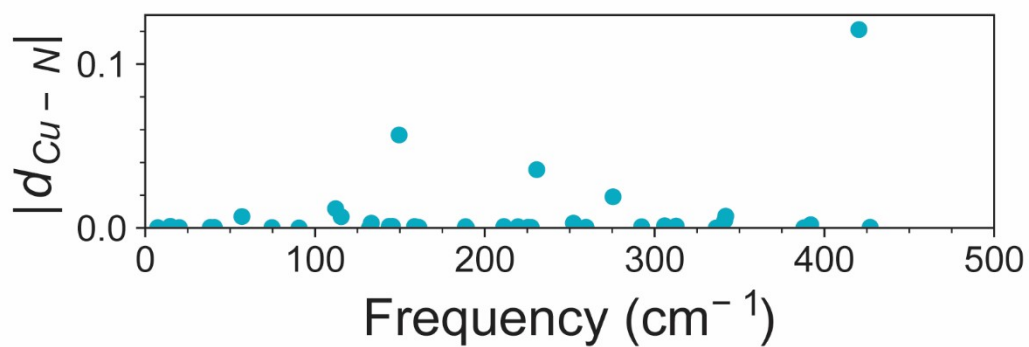**b**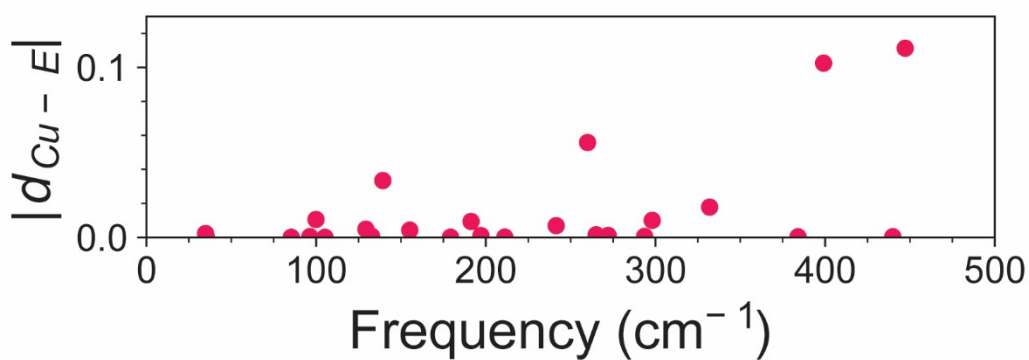**c**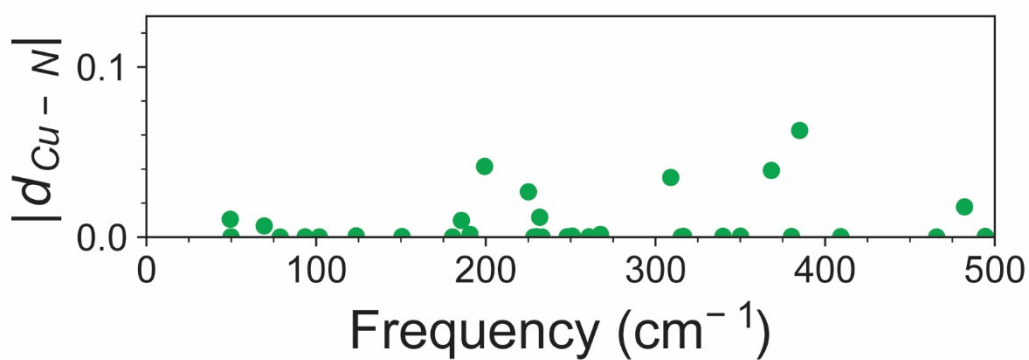

**Figure S28** | Average absolute value of the change in the bond distance metric between the Cu metal center and each of the donor atoms for each of the modes. **(a)** 1 **(b)** 2 **(c)** 3

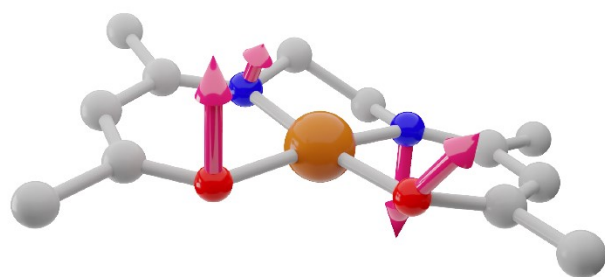

129.3  $\text{cm}^{-1}$

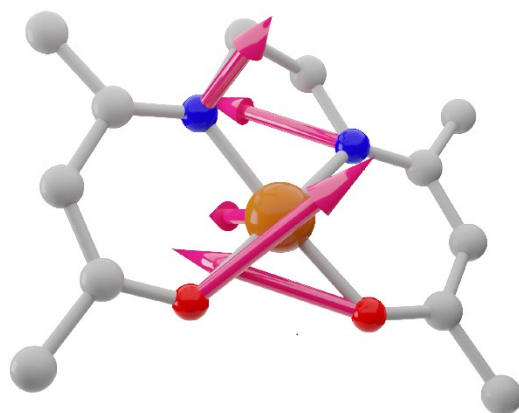

139.3  $\text{cm}^{-1}$

**Figure S29** | Visualization of the motion of the primary coordination sphere in **2** along the strongly coupled low energy vibrational modes at 129.3  $\text{cm}^{-1}$  (left) and 139.3  $\text{cm}^{-1}$  (right). The untethered oxygen atoms have large displacements, causing large perturbations of the spin center and driving rapid relaxation.

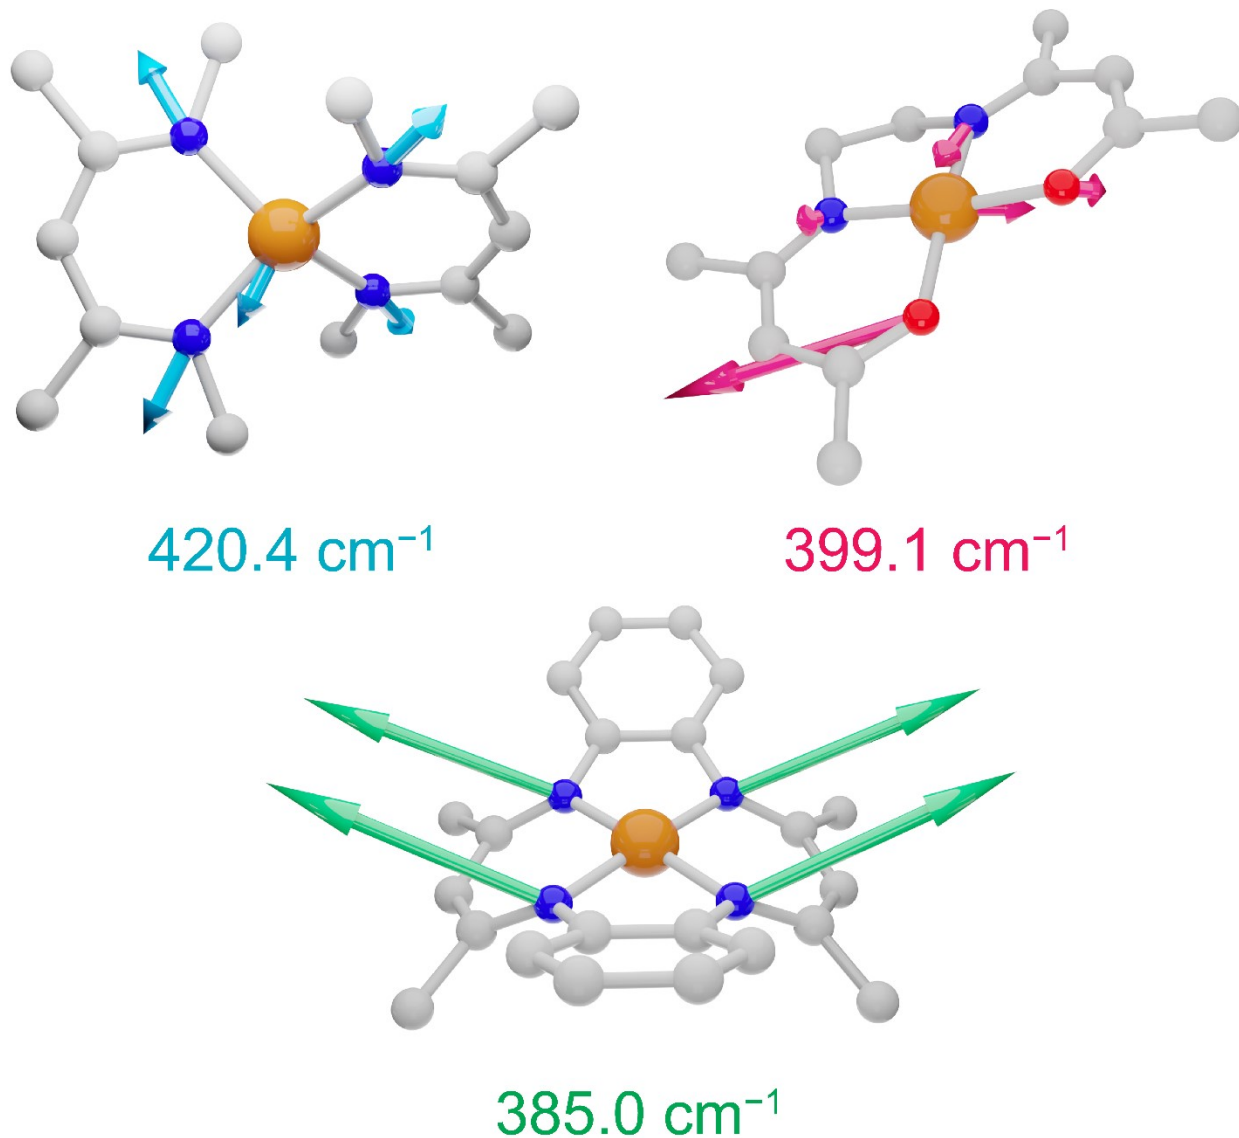

**Figure S30** | The motion of the primary coordination sphere involved in the vibrational modes with the highest  $V_{\text{sph}}^2$  coupling constant in each complex, along with the energy of the mode. Though **3** has the lowest energy of these modes, the slower net relaxation is a result of fewer strongly coupled low energy modes.

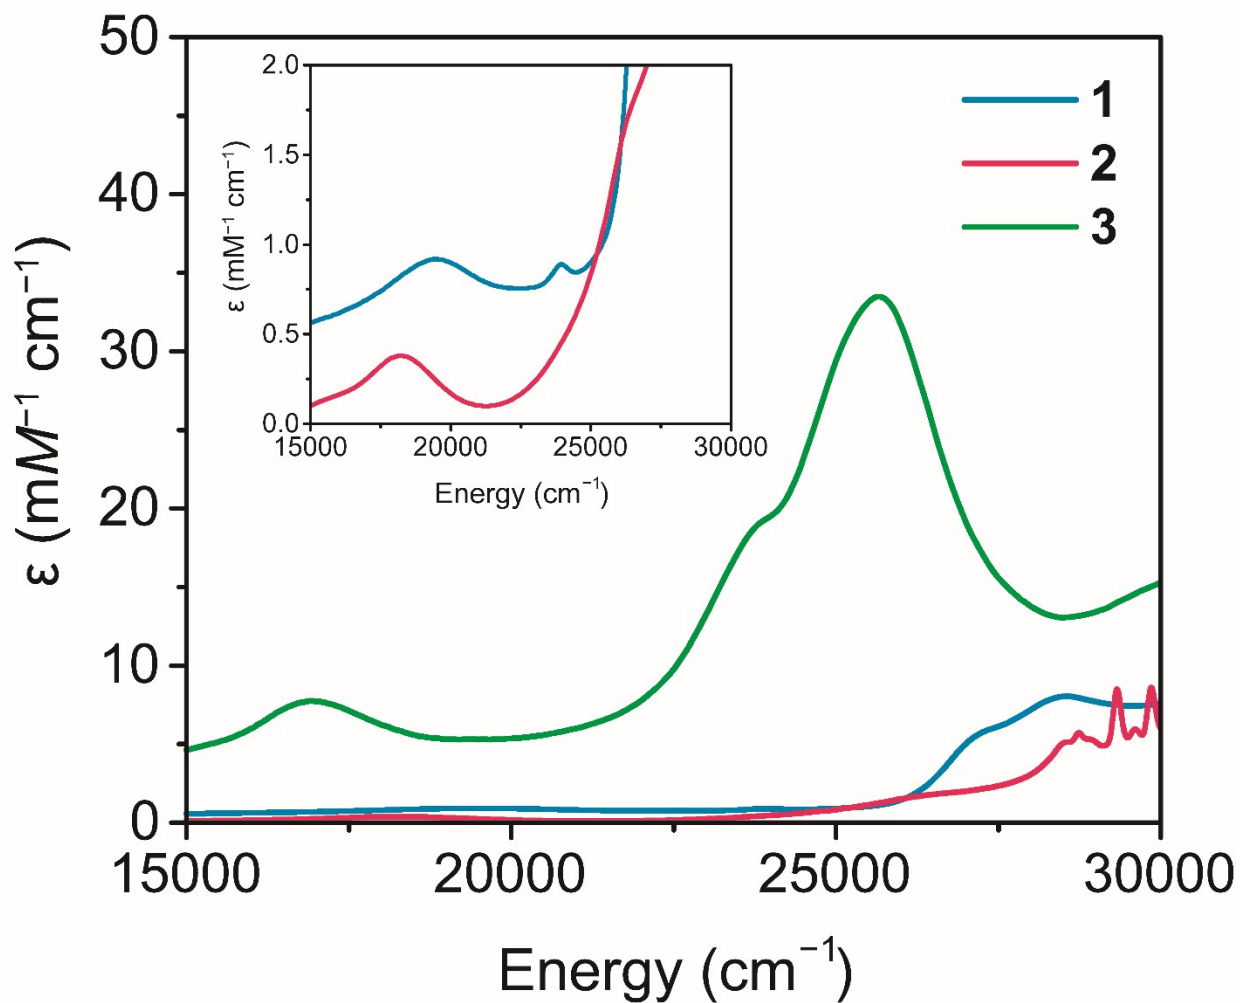

**Figure S31** | UV-VIS spectra of **1–3** in toluene at room temperature. Inset: A better view of the transitions present in **1** and **2** with significantly lower molar absorptivity than **3**.

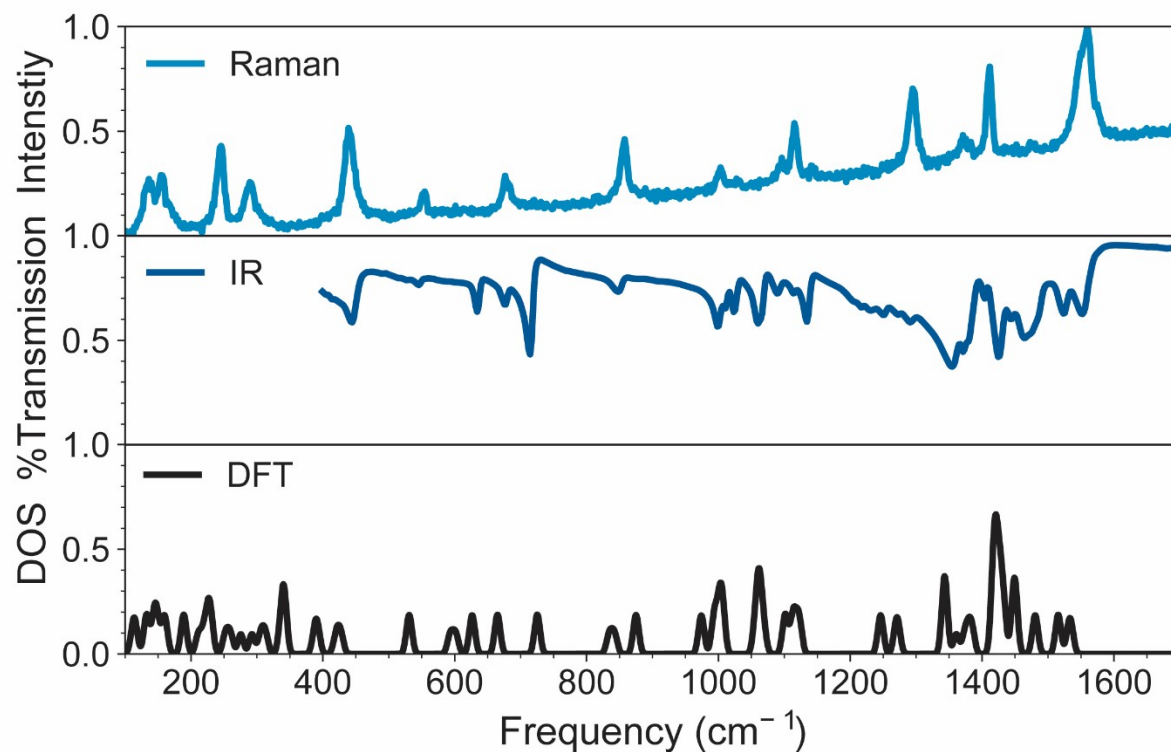

**Figure S32** | Comparison of the experimental Raman spectroscopy normalized intensities, experimental FTIR spectroscopy percent transmission, and computed normalized phonon density of states for **1**. FTIR and Raman spectra were taken on powder samples at ambient temperature.

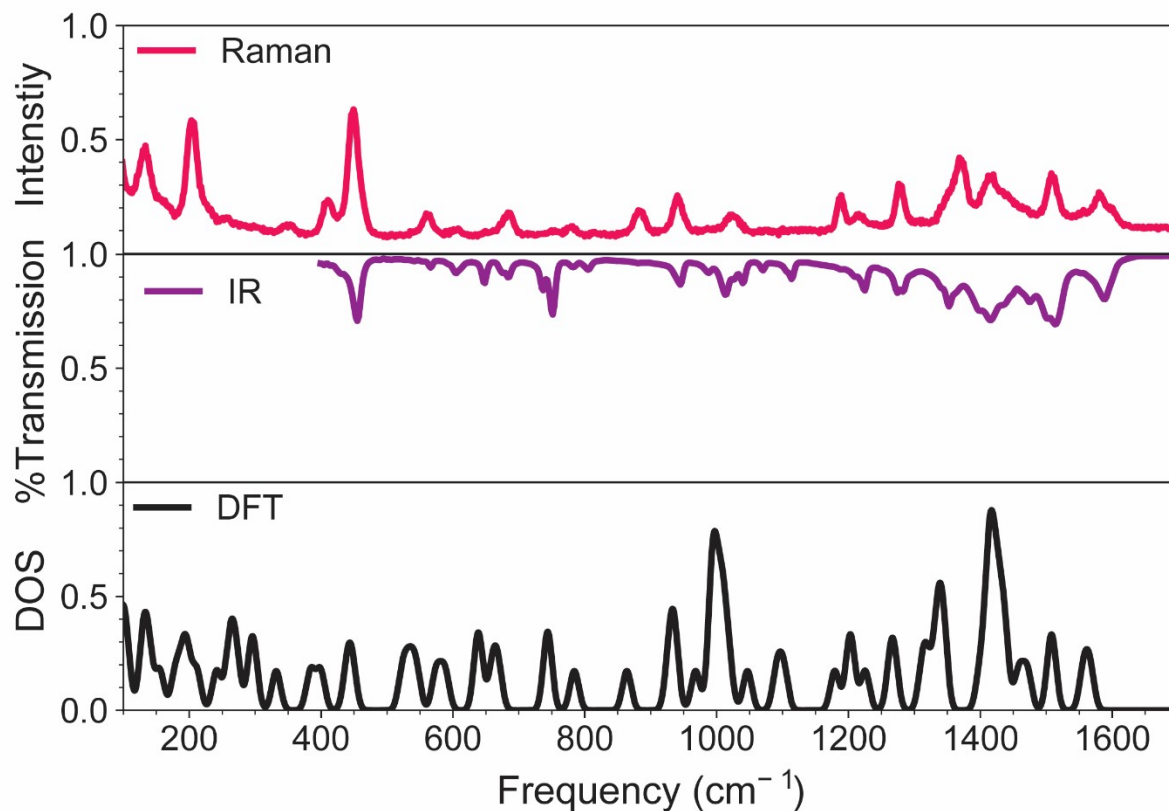

**Figure S33** | Comparison of the experimental Raman spectroscopy normalized intensities, experimental FTIR spectroscopy percent transmission, and computed normalized phonon density of states for **2**. FTIR and Raman spectra were taken on powder samples at ambient temperature.

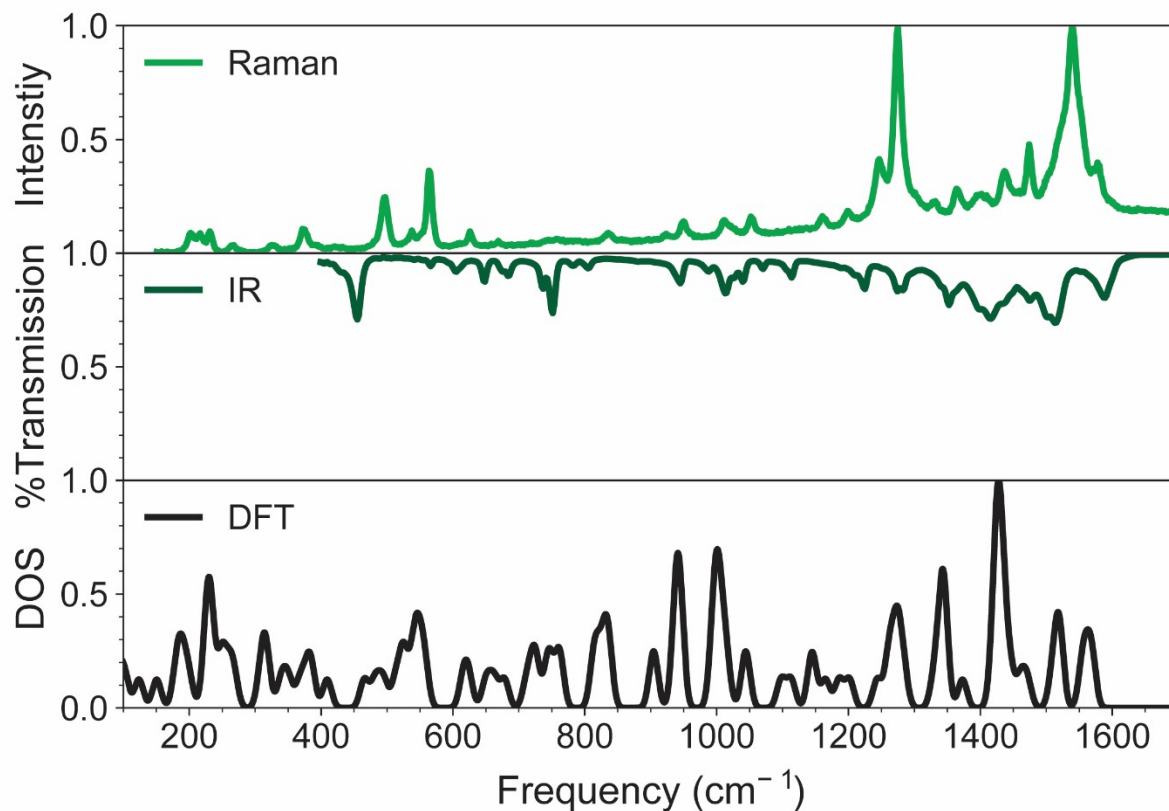

**Figure S34** | Comparison of the experimental Raman spectroscopy normalized intensities, experimental FTIR spectroscopy percent transmission, and computed normalized phonon density of states for **3**. FTIR and Raman spectra were taken on powder samples at ambient temperature.

**a**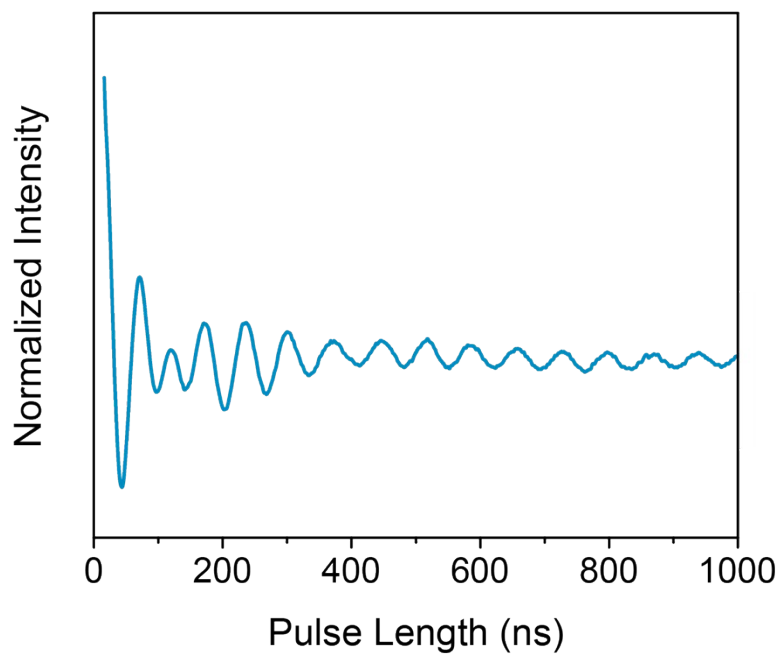**b**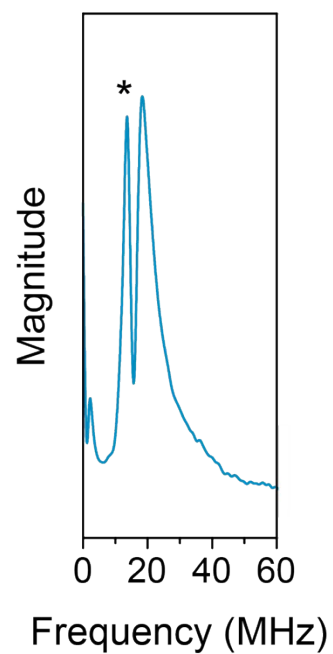

**Figure S35** | (a) Rabi oscillations observed for **1'** at 5 K. (b) The Fourier transform of the nutation experiment. A second peak at 14.5 MHz (marked with an asterisk) is observed, corresponding to the Larmor frequency of  $^1\text{H}$ . This secondary signal is a result of the Hartman-Hahn effect of the processing  $^1\text{H}$  nucleus.<sup>16</sup>

**a**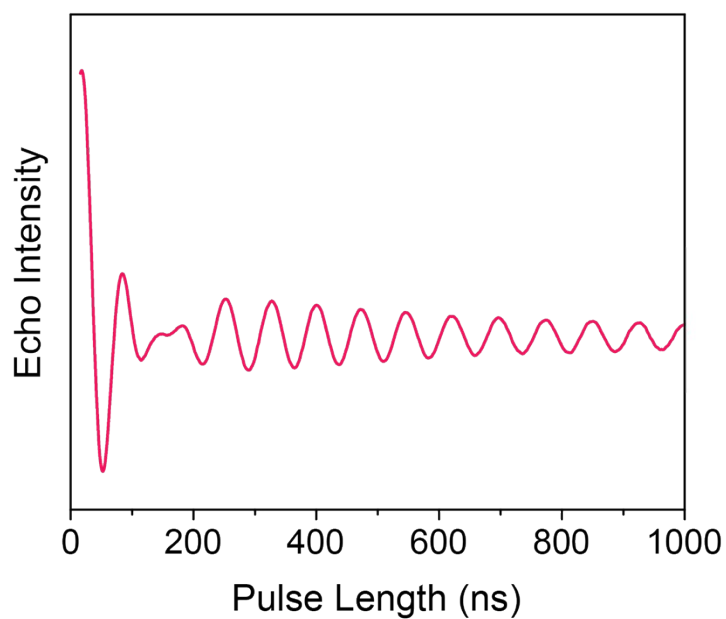**b**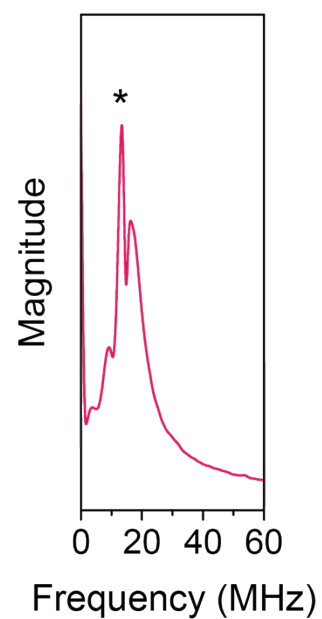

**Figure S36** | (a) Rabi oscillations observed for **2'** at 5 K. (b) The Fourier transform of the nutation experiment. A second peak at 14.5 MHz (marked with an asterisk) is observed, corresponding to the Larmor frequency of  $^1\text{H}$ . This secondary signal is a result of the Hartman-Hahn effect of the processing  $^1\text{H}$  nucleus.<sup>16</sup> Additional low frequency, weak intensity peaks are artifacts of data processing.

**a**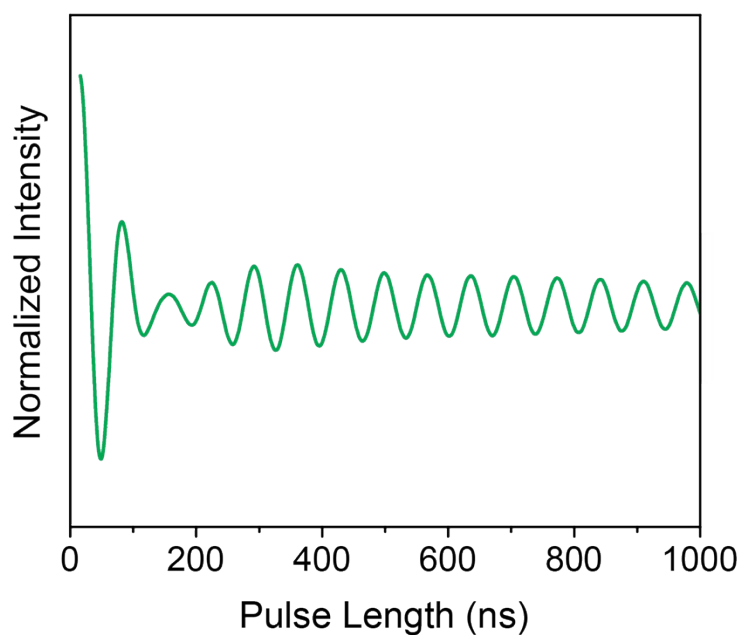**b**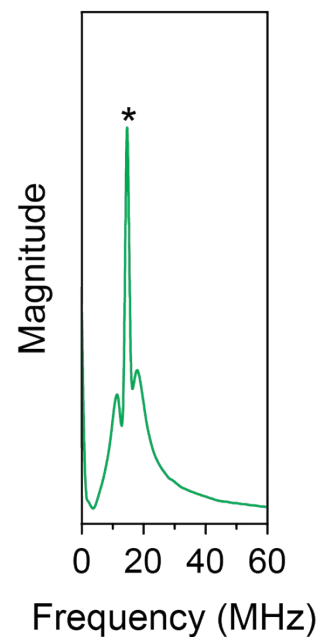

**Figure S37** | (a) Rabi oscillations observed for **3'** at 5 K. (b) The Fourier transform of the nutation experiment. A second peak at 14.5 MHz (marked with an asterisk) is observed, corresponding to the Larmor frequency of  $^1\text{H}$ . This secondary signal is a result of the Hartman-Hahn Effect of the processing  $^1\text{H}$  nucleus.<sup>16</sup> Additional low frequency, weak intensity peaks are artifacts of data processing.

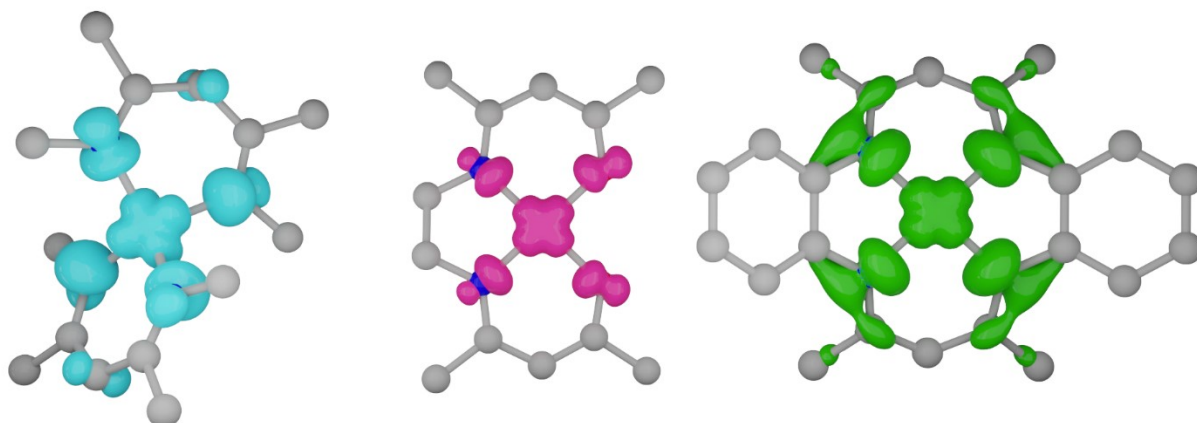

**Figure S38** | Plots of spin densities from VASP calculations at the 70% occupancy level for **1–3**, with the spin densities located on the copper atom ( $\rho_{\text{Cu}}$ ) and the average located on each donor atom ( $\rho_{\text{E,Avg}}$ ). There is an increased spin density on donor atoms and on the copper center in **2** relative to **3** due to the strong resonance effects present in **3** allowing for more delocalization of the spin onto the carbon backbone of the ligand. This places more spin density on the direct donor atoms in **2**. A weaker, though still present, resonance effect in **1** is also at play, explaining the comparatively similar  $\rho_{\text{Cu}}$  between **1** and **2**. Strong interactions with the ligand, as well this resonant effect, explain the comparatively delocalized spins in this report relative to others in the literature.<sup>23</sup>

## References

- 1 M. M. Stalzer, T. L. Lohr and T. J. Marks, *Inorg. Chem.*, 2018, **57**, 3017–3024.
- 2 P. Mountford, *Chem. Soc. Rev.*, 1998, **27**, 105–115.
- 3 R. J. Greet and D. Turnbull, *Mol. J. Chem. Phys.*, 1967, **46**, 2372.
- 4 C. E. Jackson, C.-Y. Lin, S. H. Johnson, J. Van Tol and J. M. Zadrozny, , DOI:10.1039/c9sc02899d.
- 5 A. J. Fielding, S. Fox, G. L. Millhauser, M. Chattopadhyay, P. M. H. Kroneck, G. Fritz, G. R. Eaton and S. S. Eaton, *J Magn Reson*, 2006, **179**, 92–104.
- 6 L. R. Dalton, A. L. Kwiram and J. A. Cowen, *Chem. Phys. Lett.*, 1972, **14**, 77–81.
- 7 B. Biospin, .
- 8 Mathworks, .
- 9 S. Stoll and A. Schweiger, *J. Magn. Reson.*, 2006, **178**, 42–55.
- 10 OriginLab, .
- 11 H. Chen, A. G. Maryasov, O. Y. Rogozhnikova, D. V. Trukhin, V. M. Tormyshev and M. K. Bowman, *Phys. Chem. Chem. Phys.*, 2016, **18**, 24954–24965.
- 12 S. Pfenninger, W. E. Antholine, M. E. Barr, J. S. Hyde, P. M. Kroneck and W. G. Zumft, *Biophys. J.*, 1995, **69**, 2761–2769.
- 13 C. J. Yu, M. D. Krzyaniak, M. S. Fataftah, M. R. Wasielewski and D. E. Freedman, *Chem. Sci.*, 2019, **10**, 1702–1708.
- 14 M. J. Graham, M. D. Krzyaniak, M. R. Wasielewski and D. E. Freedman, *Inorg. Chem.*, 2017, **56**, 8106–8113.
- 15 M. Atzori, E. Morra, L. Tesi, A. Albino, M. Chiesa, L. Sorace and R. Sessoli, *J. Am. Chem. Soc.*, 2016, **138**, 11234–11244.
- 16 S. R. Hartmann and E. L. Hahn, *Phys. Rev.*, 1962, **128**, 2042–2053.
- 17 B. A. Inc., 2007.
- 18 Bruker AXS Inc, 2007.
- 19 G. M. Sheldrick, *Acta Crystallogr. Sect. A Found. Crystallogr.*, 2008, **64**, 112–122.
- 20 O. V. Dolomanov, L. J. Bourhis, R. J. Gildea, J. A. K. Howard and H. Puschmann, *J. Appl. Crystallogr.*, 2009, **42**, 339–341.
- 21 G. Ricciardi, A. Bavoso, A. Rosa, F. Lelj and Y. Cizov, *J. Chem. Soc. Dalt. Trans.*, 1995, 2385–2389.
- 22 A. J. Fielding, S. Fox, G. L. Millhauser, M. Chattopadhyay, P. M. H. Kroneck, G. Fritz, G. R. Eaton and S. S. Eaton, *J. Magn. Reson.*, 2006, **179**, 92–104.
- 23 M. S. Fataftah, M. D. Krzyaniak, B. Vlasisavljevich, M. R. Wasielewski, J. M. Zadrozny and D. E. Freedman, *Chem. Sci.*, 2019, **10**, 6707–6714.
- 24 S. K. Hoffmann and S. Lijewski, *J. Magn. Reson.*, 2013, **227**, 51–56.
- 25 L. Escalera-Moreno, N. Suaud, A. Gaita-Ariñ and E. Coronado, *J. Phys. Chem. Lett*, 2017, **8**, 1695–1700.
- 26 G. R. Eaton and S. S. Eaton, *Biological Magnetic Resonance*, Kluwer Academic Publishers, 2000, vol. 19.
- 27 E. Garlatti, L. Tesi, A. Lunghi, M. Atzori, D. J. Voneshen, P. Santini, S. Sanvito, T. Guidi, R. Sessoli and S. Carretta, *Nat. Commun.*, , DOI:10.1038/s41467-020-15475-7.
- 28 P. C. Andrews, J. L. Atwood, L. J. Barbour, P. D. Croucher, P. J. Nichols, N. O. Smith, B. W. Skelton, A. H. White and C. L. Raston, *J. Chem. Soc. - Dalt. Trans.*, 1999, **17**, 2927–2932.
- 29 L. Yang, D. R. Powell and R. P. Houser, *Dalt. Trans.*, 2007, 955–964.
- 30 D. Rosiak, A. Okuniewski and J. Chojnacki, *Polyhedron*, 2018, **146**, 35–41.
- 31 G. Kresse and J. Hafner, *Phys. Rev. B*, 1993, **47**, 558–561.
- 32 G. Kresse and J. Hafner, *Phys. Rev. B*, 1994, **49**, 14251–14269.
- 33 G. Kresse and J. Furthmüller, *Comput. Mater. Sci.*, 1996, **6**, 15–50.

- 34 T. Frederiksen, M. Paulsson, M. Brandbyge and A. P. Jauho, *Phys. Rev. B - Condens. Matter Mater. Phys.*, 2007, **75**, 205413.
- 35 F. Neese, *Wiley Interdiscip. Rev. Comput. Mol. Sci.*, 2012, **2**, 73–78.
- 36 A. D. Becke, *J. Chem. Phys.*, 1993, **98**, 1372–1377.
- 37 C. Lee, W. Yang and R. G. Parr, *Phys. Rev. B*, 1988, **37**, 785–789.
- 38 S. H. Vosko, L. Wilk and M. Nusair, *Can. J. Phys.*, 1980, **58**, 1200–1211.
- 39 P. J. Stephens, F. J. Devlin, C. F. Chabalowski and M. J. Frisch, *J. Phys. Chem.*, 1994, **98**, 11623–11627.
- 40 F. Weigend, F. Furche and R. Ahlrichs, *J. Chem. Phys.*, 2003, **119**, 12753–12762.
- 41 F. Weigend, *Phys. Chem. Chem. Phys.*, 2006, **8**, 1057–1065.
- 42 N. P. Kazmierczak, R. Mirzoyan and R. G. Hadt, *J. Am. Chem. Soc.*, 2021, **143**, 17305–17315.
- 43 T. V. Basova, V. G. Kiselev, B.-E. Schuster, H. Peisert and T. ChassÃ©, *J. Raman Spectrosc.*, 2009, **40**, 2080–2087.
